1 **LACTATE IS A MAJOR ENERGY SUBSTRATE FOR CORTICAL NEURONS AND**  
2 **ENHANCES THEIR FIRING ACTIVITY.**

3 Anastassios Karagiannis<sup>1</sup>, Thierry Gallopin<sup>2</sup>, Alexandre Lacroix<sup>1</sup>, Fabrice Plaisier<sup>1</sup>,  
4 Juliette Piquet<sup>1</sup>, H el ene Geoffroy<sup>2</sup>, R egine Hepp<sup>1</sup>, J er emie Naud e<sup>1</sup>, Benjamin Le  
5 Gac<sup>1</sup>, Richard Egger<sup>3</sup>, Bertrand Lambolez<sup>1</sup>, Dongdong Li<sup>1</sup>, Jean Rossier<sup>1,2</sup>, Jochen F.  
6 Staiger<sup>4</sup>, Hiromi Imamura<sup>5</sup>, Susumu Seino<sup>6</sup>, Jochen Roeper<sup>3</sup> and Bruno Cauli<sup>1\*</sup>.

7

8 1. Sorbonne Universit e, CNRS, INSERM, Neurosciences Paris Seine - Institut de  
9 Biologie Paris Seine (NPS-IBPS), 9 quai Saint Bernard, 75005 Paris, France.

10 2. Brain Plasticity Unit, CNRS, ESPCI Paris, PSL Research University, 10 rue  
11 Vauquelin, 75005 Paris, France.

12 3. Institute of Neurophysiology, Goethe University Frankfurt, Theodor-Stern-Kai 7,  
13 60590 Frankfurt, Germany.

14 4. Institute for Neuroanatomy, University Medical Center G ttingen, Georg-August-  
15 University G ttingen, 37075 G ttingen, Germany.

16 5. Graduate School of Biostudies, Kyoto University, Kyoto 606-8501, Japan.

17 6. Division of Molecular and Metabolic Medicine, Kobe University Graduate School of  
18 Medicine, 7-5-1 Kusunoki-cho, Chuo-ku, Kobe, Hyogo 650-0017, Japan.

19

20

21

22

23

24

25 \*Correspondence: [bruno.cauli@upmc.fr](mailto:bruno.cauli@upmc.fr)

## 1 **SUMMARY**

2 Glucose is the mandatory fuel for the brain, yet the relative contribution of glucose  
3 and lactate for neuronal energy metabolism is unclear. We found that increased  
4 lactate, but not glucose concentration, enhances the spiking activity of neurons of the  
5 cerebral cortex. Enhanced spiking was dependent on ATP-sensitive potassium ( $K_{ATP}$ )  
6 channels formed with Kir6.2 and SUR1 subunits, which we show are functionally  
7 expressed in most neocortical neuronal types. We also demonstrate the ability of  
8 cortical neurons to take-up and metabolize lactate. We further reveal that ATP is  
9 produced by cortical neurons largely via oxidative phosphorylation and only modestly  
10 by glycolysis. Our data demonstrate that in active neurons, lactate is preferred to  
11 glucose as an energy substrate, and that lactate metabolism shapes neuronal activity  
12 in the neocortex through  $K_{ATP}$  channels. Our results highlight the importance of  
13 metabolic crosstalk between neurons and astrocytes for brain function.

14

## 15 **KEYWORDS**

16  $K_{ATP}$  channel, pyramidal cell, interneuron, glucose, single cell RT-PCR, ATP.

17

## 18 **HIGHLIGHTS**

- 19
- Most cortical neurons subtypes express pancreatic beta-cell like  $K_{ATP}$

20 channels.

  - Lactate enhances spiking activity via its uptake and closure of  $K_{ATP}$  channels.

21

  - Cortical neurons take up and oxidize lactate.

22

  - Cortical neurons produce ATP mainly by oxidative phosphorylation.

23

24

## 1 INTRODUCTION

2 The human brain represents 2% of the body mass, yet it consumes about 20% of  
3 blood oxygen and glucose which are mandatory energy substrates (Clarke and  
4 Sokoloff, 1999). The majority (~50-80%) of the cerebral energy metabolism is  
5 believed to be consumed by the Na<sup>+</sup>/K<sup>+</sup> ATPase pump to maintain cellular ionic  
6 gradients dissipated during synaptic transmission and action potentials (Attwell and  
7 Laughlin, 2001;Lennie, 2003). Synaptic and spiking activities are also coupled with  
8 local cerebral blood flow and glucose uptake (Devor et al., 2008;Logothetis, 2008).  
9 This process, referred to as neurovascular and neurometabolic coupling, is the  
10 physiological basis of brain imaging techniques (Raichle and Mintun, 2006) and  
11 maintains extracellular glucose within a physiological range of 2-3 mM (Silver and  
12 Erecinska, 1994;Hu and Wilson, 1997b). Also, following increased neuronal activity  
13 extracellular lactate increases (Prichard et al., 1991;Hu and Wilson, 1997a) for  
14 several minutes up to twice of its 2-5 mM basal concentration despite oxygen  
15 availability (Magistretti and Allaman, 2018).

16  
17 Based on the observations that various by-products released during glutamatergic  
18 transmission stimulate astrocyte glucose uptake, aerobic glycolysis and lactate  
19 release (Pellerin and Magistretti, 1994;Voutsinos-Porche et al., 2003;Ruminot et al.,  
20 2011;Choi et al., 2012;Sotelo-Hitschfeld et al., 2015;Lerchundi et al., 2015), lactate  
21 has been proposed to be shuttled from astrocytes to neurons to meet neuronal  
22 energy needs. This hypothesis is supported by the existence of a lactate gradient  
23 between astrocytes and neurons (Machler et al., 2016), the preferential use of lactate  
24 as an energy substrate in cultured neurons (Bouzier-Sore et al., 2003;Bouzier-Sore  
25 et al., 2006), and its ability to support neuronal activity during glucose shortage  
26 (Schurr et al., 1988;Rouach et al., 2008;Wyss et al., 2011;Choi et al., 2012).  
27 However, the use of different fluorescent glucose analogues to determine whether  
28 astrocytes or neurons take up more glucose during sensory-evoked neuronal activity  
29 has led to contradicting results (Chuquet et al., 2010;Lundgaard et al., 2015).  
30 Furthermore brain slices and *in vivo* evidence have indicated that synaptic and  
31 sensory stimulation enhanced neuronal glycolysis and potentially lactate release by  
32 neurons (Ivanov et al., 2014;Diaz-Garcia et al., 2017), thereby challenging the  
33 astrocyte-neuron lactate shuttle hypothesis. Hence, the relative contribution of  
34 glucose and lactate to neuronal ATP synthesis remains unresolved.

1 ATP-sensitive potassium channels ( $K_{ATP}$ ) act as metabolic sensors controlling  
2 various cellular functions (Babenko et al., 1998). Their open probability ( $P_o$ ) is  
3 regulated by the energy charge of the cell (*i.e.* the ATP/ADP ratio). While ATP  
4 mediates a tonic background inhibition of  $K_{ATP}$  channels, cytosolic increases of ADP  
5 concentrations that occur as a sequel to enhanced energy demands, increase the  $P_o$   
6 of  $K_{ATP}$  channels. In neurons, electrical activity is accompanied by enhanced sodium  
7 influx, which in turn activates the  $Na^+/K^+$  ATPase. Activity of this pump alters the  
8 submembrane ATP/ADP ratio sufficiently to activate  $K_{ATP}$  channels (Tanner et al.,  
9 2011). The use of fluorescent ATP/ADP biosensors has demonstrated that  $K_{ATP}$   
10 channels are activated ( $P_o > 0.1$ ) when ATP/ADP ratio is  $\leq 5$  (Tantama et al., 2013).

11  
12  $K_{ATP}$  channels are heterooctamers composed of four inwardly rectifying  $K^+$  channel  
13 subunits, Kir6.1 or Kir6.2, and four sulfonylurea receptors, SUR1 or SUR2, the later  
14 existing in two splice variants (SUR2A and SUR2B) (Sakura et al., 1995; Aguilar-  
15 Bryan et al., 1995; Inagaki et al., 1995b; Isomoto et al., 1996; Inagaki et al.,  
16 1996; Chutkow et al., 1996; Yamada et al., 1997; Li et al., 2017; Martin et al., 2017; Lee  
17 et al., 2017; Puljung, 2018). The composition in  $K_{ATP}$  channel subunits confers  
18 different functional properties, pharmacological profiles as well as metabolic  
19 sensitivities (Isomoto et al., 1996; Inagaki et al., 1996; Gribble et al., 1997; Yamada et  
20 al., 1997; Okuyama et al., 1998; Liss et al., 1999).  $K_{ATP}$  channel subunits are  
21 expressed in the neocortex (Ashford et al., 1988; Karschin et al., 1997; Dunn-Meynell  
22 et al., 1998; Thomzig et al., 2005; Cahoy et al., 2008; Zeisel et al., 2015; Tasic et al.,  
23 2016) and have been shown to protect cortical neurons from ischemic injury (Heron-  
24 Milhavet et al., 2004; Sun et al., 2006) and to modulate their excitability (Gimenez-  
25 Cassina et al., 2012) and intrinsic firing activity (Lemak et al., 2014).  $K_{ATP}$  channels  
26 could thus be leveraged to decipher electrophysiologically the relative contribution of  
27 glucose and lactate to neuronal ATP synthesis. Here, we apply single-cell RT-PCR  
28 (scRT-PCR) to identify the mRNA subunit composition of  $K_{ATP}$  channel across  
29 different neocortical neuron subtypes and demonstrate lactate as the preferred  
30 energy substrate that also enhances firing activity.

31

## 1 **RESULTS**

### 2 **Expression of K<sub>ATP</sub> channel subunits in identified cortical neurons**

3 We first sought to determine whether K<sub>ATP</sub> channel subunits were expressed in  
4 different neuronal subtypes from the neocortex. Neurons (n=277) of the juvenile rat  
5 barrel cortex from layers I to IV (Table S1) were functionally and molecularly  
6 characterized in acute slices by scRT-PCR (Figure 1), whose sensitivity was  
7 validated from 500 pg of total cortical RNAs (Figure S1A). Neurons were segregated  
8 into 7 different subtypes according to their overall molecular and electrophysiological  
9 similarity (Figure 1A) using unsupervised Ward's clustering (Ward, 1963), an  
10 approach we previously successfully used to classify cortical neurons (Cauli et al.,  
11 2000; Gallopin et al., 2006; Karagiannis et al., 2009). Regular spiking (RS, n=63) and  
12 intrinsically bursting (IB, n=10) cells exhibited the molecular characteristics of  
13 glutamatergic neurons, with very high single-cell detection rate (n=69 of 73, 95%) of  
14 vesicular glutamate transporter 1 (vGluT1) and low detection rate (n=7 of 73, 10%) of  
15 glutamic acid decarboxylases (GADs, Figure 1B-E and Table S2), the GABA  
16 synthesizing enzymes. This group of glutamatergic neurons distinctly displayed  
17 hyperpolarized resting membrane potential ( $-81.2 \pm 0.8$  mV), possessed a large  
18 membrane capacitance ( $108.6 \pm 3.6$  pF), discharged with wide action potentials ( $1.4$   
19  $\pm 0.0$  ms) followed by medium afterhyperpolarizations (mAHS). These neurons did  
20 sustain only low maximal frequencies ( $35.4 \pm 1.6$  Hz) and showed complex spike  
21 amplitude accommodation (Table S3-7). In contrast to RS neurons, IB neurons were  
22 more prominent in deeper layers (Table S1) and their bursting activity affected their  
23 adaptation amplitudes and kinetics (Figure 1C and Tables S4-5), spike broadening  
24 (Figure 1C and Tables S6) and the shape of mAHS (Figure 1C and Tables S7).

25 All other neuronal subtypes were characterized by a high single-cell detection rate of  
26 GAD65 and/or GAD67 mRNA (n=202 of 204, 99%, Figure 1B and Table S2) and  
27 therefore likely corresponded to GABAergic interneurons. Among GAD-positive  
28 population, neurons frequently expressed mRNA for vasoactive intestinal polypeptide  
29 (VIP), and in accordance to their electrophysiological phenotypes, were segregated  
30 into Bursting VIP (n=27) and Adapting VIP (n=59) neurons. These VIP interneurons  
31 were further characterized by high membrane resistance ( $581 \pm 27$  M $\Omega$ ) and small  
32 membrane capacitance ( $52.7 \pm 2.3$  pF, Figure 1B-C and Tables S2-3).

33 Other GABAergic interneurons co-expressed somatostatin (SOM) and calbindin (CB)  
34 as well as neuropeptide Y (NPY) to a lesser extent and functionally corresponded to

1 Adapting SOM neurons (n=24, Figure 1B and Table S2). They displayed depolarized  
2 resting membrane potential, pronounced voltage sags, low rheobases and  
3 pronounced afterdepolarizations (Figure 1C and Table S3-6). In another group of  
4 GABAergic adapting interneurons located in superficial layers, mRNA for NPY was  
5 detected at a high rate (n=31 of 56, 55%). In these Adapting NPY interneurons  
6 mRNA for nitric oxide synthase-1 (NOS-1) was detected at a lower rate (Figure 1B  
7 and Tables S1-2). In response to suprathreshold depolarizing current steps, these  
8 interneurons showed very little spike frequency adaptation (Figure 1C and Table S4).  
9 Finally, parvalbumin (PV) was observed in virtually all neurons of a subpopulation  
10 termed Fast Spiking-PV interneurons (FS-PV, n=37 of 38, 97%, Figure 1B and Table  
11 S2). In comparison to all other cortical neurons described above, they were  
12 characterized by low membrane resistance ( $201 \pm 13 \text{ M}\Omega$ ), fast time constant, high  
13 rheobase, very short spikes ( $0.6 \pm 0.0 \text{ ms}$ ) with sharp fast afterhyperpolarizations  
14 (fAHs) and the ability to sustain high firing rates ( $139.9 \pm 6.8 \text{ Hz}$ ) with little to no  
15 frequency adaptation (Figure 1C and Tables S3-7). These data thus identified  
16 different neuronal subtypes based on their distinctive electrophysiological and  
17 molecular features (Ascoli et al., 2008) confirming our previous classification  
18 schemes (Cauli et al., 2000; Gallopin et al., 2006; Karagiannis et al., 2009).

19 The functional and molecular classification of cortical neurons allowed us to probe for  
20 the single-cell expression of mRNA for  $K_{\text{ATP}}$  channel subunits in well defined  
21 subpopulations. We observed consistent expression of Kir6.2 and SUR1 between the  
22 different cortical neuronal subtypes (Figure 1D-F). Although the scRT-PCR  
23 procedure was shown to be reliable for co-detecting all  $K_{\text{ATP}}$  channel subunits from  
24 low amounts of total cortical RNAs (Figure S1A), the overall single-cell detection  
25 rates were low for Kir6.2 (n=63 of 248, 25%) and SUR1 (n=28 of 277, 10%). In  
26 accordance to previous single-cell studies (Liss et al., 1999; Zeisel et al., 2015; Tasic  
27 et al., 2016), our observation suggests an expression at a low copy number at the  
28 single-cell level. Apart from a single Adapting NPY neuron (Figure 1D), where Kir6.1  
29 mRNA was detected, our data set provide evidence that for all neocortical neuron  
30 types the pattern of detected  $K_{\text{ATP}}$  channels mRNA expression suggested the co-  
31 expression Kir6.2 and SUR1 subunits. This implies that most cortical neurons might  
32 be endowed with a pancreatic beta-cell like  $K_{\text{ATP}}$  channel, which might operate as a  
33 metabolic sensor. We next tested this prediction with functional recordings of  $K_{\text{ATP}}$   
34 channel-mediated whole-cell currents in neocortical neurons.



## 1 **Characterization of $K_{ATP}$ channels in cortical neurons**

2 To assess whether  $K_{ATP}$  channels are functional in identified cortical neurons ( $n=18$ ,  
3 Figure 2A), we measured the effects of different  $K_{ATP}$  channel modulators on whole-  
4 cell currents ( $Q_{(3,18)}=32.665$ ,  $p=3.8 \times 10^{-7}$ , Friedman test) and membrane resistances  
5 ( $Q_{(3,18)}=40.933$ ,  $p=6.8 \times 10^{-9}$ ). Pinacidil (100  $\mu$ M), a SUR2-preferring  $K_{ATP}$  channel  
6 opener (Inagaki et al., 1996;Moreau et al., 2005), had little or no effect on current ( $4.1$   
7  $\pm 3.7$  pA,  $p=0.478$ ) and membrane resistance ( $-9.6 \pm 3.7$  %,  $p=0.121$ , Figure 2B-C).  
8 By contrast, diazoxide (300  $\mu$ M), an opener acting on SUR1 and SUR2B-containing  
9  $K_{ATP}$  channels (Inagaki et al., 1996;Moreau et al., 2005), consistently induced an  
10 outward current ( $45.0 \pm 9.6$  pA,  $p=4.8 \times 10^{-5}$ ) and a decrease in membrane  
11 resistance ( $-34.5 \pm 4.3\%$ ,  $p=3.6 \times 10^{-5}$ ) indicative of the activation of a hyperpolarizing  
12 conductance (Figure 2B-C). The sulfonylurea tolbutamide (500  $\mu$ M, Figure 2B-C), a  
13  $K_{ATP}$  channel blocker (Ammala et al., 1996;Isomoto et al., 1996;Gribble et al.,  
14 1997;Isomoto and Kurachi, 1997), did not change whole-cell basal current ( $-6.6 \pm 3.0$   
15 pA,  $p=0.156$ ) or membrane resistance ( $20.5 \pm 7.5\%$ ,  $p=3.89 \times 10^{-2}$ ). Conversely,  
16 tolbutamide dramatically reversed diazoxide effects on both current ( $p=4.1 \times 10^{-8}$ )  
17 and membrane resistance ( $p=5.8 \times 10^{-10}$ ).

18  
19 In virtually all neuronal subtypes ( $H_{(6,43)}=2.274$ ,  $p=0.810$ , Kruskal–Wallis H test) or  
20 groups ( $t_{(42)}=0.3395$ ,  $p=0.736$ , Student's t-test), the diazoxide-tolbutamide  
21 current/voltage relationship reversed very close to the theoretical potassium  
22 equilibrium potential ( $E_K=-106.0$  mV, Figure 2D-F) confirming the opening of a  
23 selective potassium conductance. Besides its effects on plasma membrane  $K_{ATP}$   
24 channels, diazoxide is also a mitochondrial uncoupler (Drose et al., 2006) which  
25 increases reactive oxygen species (ROS) production. This might stimulate  $Ca^{2+}$   
26 sparks and large-conductance  $Ca^{2+}$ -activated potassium channels (Xi et al., 2005)  
27 leading to potential confounding effects. This possibility was ruled out by the  
28 observation that Mn(III)tetrakis(1-methyl-4-pyridyl)porphyrin (MnTMPyP, 25  $\mu$ M), a  
29 ROS scavenger (D'Agostino et al., 2007), did not reduce the diazoxide-tolbutamide  
30 responses on current ( $t_{(10)}=0.76559$ ,  $p=0.462$ , Figure S2A,B) and conductance  
31 ( $t_{(10)}=1.24758$ ,  $p=0.241$ , Figure S2A,C).

32  
33 Cortical neurons exhibited  $K_{ATP}$  conductances of similar value between their subtypes  
34 ( $H_{(6,63)}=5.6141$ ,  $p=0.468$ ) or groups ( $U_{(9,54)}=233$ ,  $p=0.855$ , Mann–Whitney U test,

1 Figures S3A,B).  $K_{ATP}$  channels activated by diazoxide essentially doubled the whole  
2 cell conductance in the subthreshold membrane potential compared to control or  
3 tolbutamide conditions, regardless of neuronal subtypes ( $H_{(6,63)}=5.4763$ ,  $p=0.484$ ) or  
4 groups ( $t_{(61)}=1.324$ ,  $p=0.191$ , Figures 2G,H). Also,  $K_{ATP}$  current density was similar  
5 ( $H_{(6,63)}=4.4769$ ,  $p=0.612$ ,  $U_{(9,54)}=240.5$ ,  $p=0.965$ , Figures S3C,D). Together with the  
6 pinacidil unresponsiveness, these data indicate that the large majority of cortical  
7 neurons expressed functional SUR1-mediated  $K_{ATP}$  channels in a homogeneous  
8 fashion across different subpopulations. To confirm that Kir6.2 is the pore-forming  
9 subunit of  $K_{ATP}$  channels in cortical neurons, we used a genetic approach based on  
10 Kir6.2 knock-out mice (Miki et al., 1998). We first verified the expression of Kir6.2 and  
11 SUR1 subunits in pyramidal cells from wild type mice by scRT-PCR (Figure 3A,B).  
12 We next used a dialysis approach by recording neurons with an ATP-free pipette  
13 solution (Miki et al., 2001) enriched in sodium (20 mM) to stimulate submembrane  
14 ATP depletion and ADP production by the  $Na^+/K^+$  ATPase, which is known to activate  
15  $K_{ATP}$  channels (Figure 3H). We confirmed that ATP1a1 and ATP1a3 (Figure 3B) were  
16 the main  $\alpha$ -subunits of the  $Na^+/K^+$  ATPase pump in pyramidal neurons (Zeisel et al.,  
17 2015; Tasic et al., 2016). Dialysis of ATP-free/20 mM  $Na^+$ -pipette solution indeed  
18 induced a standing outward current in Kir6.2<sup>+/+</sup> neurons within 5 minutes ( $46.7 \pm 19.0$   
19 pA at -50 mV,  $n=26$ ) that was reversing close to  $E_K$  (Figure 3C,E). In contrast, this  
20 current was not observed in Kir6.2<sup>-/-</sup> neurons ( $-59.9 \pm 11.9$  pA,  $n=22$ ,  $U_{(26,22)}=78$ ,  
21  $p=2.4221 \times 10^{-6}$ , one-tailed, Figure 3D-G). Collectively, these data show that cortical  
22 neurons predominately express functional  $K_{ATP}$  channels composed of Kir6.2 and  
23 SUR1 subunits.

24

### 25 **Modulation of neuronal excitability and activity by $K_{ATP}$ channel**

26 Despite their large diversity, cortical neurons display a homogenous functional  
27 expression of  $K_{ATP}$  channels, questioning how these channels integrate the metabolic  
28 environment to adjust neuronal activity. To address this question, we first evaluated  
29 in identified cortical neurons ( $n=39$ ) the ability of  $K_{ATP}$  channels to modulate neuronal  
30 excitability, notably by measuring membrane potentials ( $Q_{(2,39)}=38.000$ ,  $p=5.6 \times 10^{-9}$ )  
31 and membrane resistances ( $Q_{(2,39)}=40.205$ ,  $p=1.9 \times 10^{-9}$ ), as well as spiking activity  
32 ( $Q_{(2,39)}=28.593$ ,  $p=6.2 \times 10^{-9}$ ). Following electrophysiological identification, the  $K_{ATP}$   
33 channel blocker tolbutamide was applied, which resulted in a slight depolarization  
34 ( $\Delta V_m=2.6 \pm 0.8$  mV,  $p=1.74 \times 10^{-2}$ , Figure 4A,D) and increase in membrane



1 resistance ( $\Delta R_m = 78 \pm 31 \text{ M}\Omega$ ,  $p = 1.52 \times 10^{-3}$ , Figure 4B,E). These effects were strong  
2 enough to trigger and stimulate the firing of action potentials ( $\Delta F = 0.3 \pm 0.1 \text{ Hz}$ ,  $p =$   
3  $9.21 \times 10^{-3}$ , Figure 4A,C,F). By contrast, diazoxide hyperpolarized cortical neurons ( $-$   
4  $4.0 \pm 0.6 \text{ mV}$ ,  $p = 1.87 \times 10^{-4}$ , Figure 4A,D), decreased their membrane resistance ( $-39$   
5  $\pm 23 \text{ M}\Omega$ ,  $p = 1.52 \times 10^{-3}$ , Figure 4B,E) but did alter their rather silent basal spiking  
6 activity ( $-0.1 \pm 0.1 \text{ Hz}$ ,  $p = 0.821$ , Figure 4A,C,F).

7  
8 Most cortical neurons ( $n = 32$  of  $39$ ) showed modulation of neuronal excitability by  
9 both  $K_{ATP}$  channel modulators and were considered to be responsive. A similar  
10 proportion of responsive neurons was observed between neuronal subtypes (Figure  
11 S4A,  $X^2_{(5)} = 7.313$ ,  $p = 0.1984$ ) or groups (Figure S4B,  $p = 0.9999$ , Fisher's exact test).  
12 The apparent relative lack of responsiveness in FS-PV interneurons (Figure S4A),  
13 despite a whole-cell  $K_{ATP}$  conductance similar to that of other neuronal types (Figure  
14 S3A), is likely attributable to their low input resistance (Table S3) making  $K_{ATP}$   
15 channels less effective to change membrane potential. Overall,  $K_{ATP}$  channels  
16 modulated membrane potential, resistance and firing rate by up to  $7.6 \pm 0.9 \text{ mV}$ ,  $76 \pm$   
17  $17\%$  and  $0.5 \pm 0.2 \text{ Hz}$ , respectively. This modulation of neuronal excitability (Figure  
18 4G-J) and activity (Figure S4C,D) was similar between neuronal subtypes or groups  
19 (Figure 4H-J and S4C-E). Thus,  $K_{ATP}$  channels modulate the excitability and activity  
20 of all subtypes of cortical neurons.

## 21 22 **Enhancement of neuronal activity by lactate via modulation of $K_{ATP}$ channels**

23 The uniform expression of metabolically highly sensitive  $K_{ATP}$  channels by cortical  
24 neurons suggests their ability to couple the local glycolysis capacity of astrocytes  
25 with spiking activity. We therefore evaluated whether extracellular changes in  
26 glucose and lactate could differentially shape the spiking activity of cortical neurons  
27 through their energy metabolism and  $K_{ATP}$  channel modulation. Importantly, to  
28 preserve intracellular metabolism, neurons were recorded in perforated patch-  
29 configuration. Stable firing rates of about  $4 \text{ Hz}$  inducing ATP consumption by the  
30  $\text{Na}^+/\text{K}^+$  ATPase (Attwell and Laughlin, 2001) were evoked by applying a depolarizing  
31 current and continuously monitored throughout changes in extracellular medium  
32 (Figure 5A,  $Q_{(2,16)} = 22.625$ ,  $p = 1.222 \times 10^{-5}$ ).

1 Decreasing extracellular glucose from 10 mM to a normoglycemic concentration of  
2 2.5 mM (Silver and Erecinska, 1994;Hu and Wilson, 1997b) did not change firing rate  
3 (Figure 5A,B,  $p=0.2159$ ) of cortical neurons ( $n=16$ ). By contrast, supplementing  
4 extracellular 2.5 mM glucose with 15 mM lactate, a concentration observed in the  
5 blood after an intense physical exercise (Quistorff et al., 2008) and corresponding to  
6 the same number of carbon atoms as 10 mM glucose, roughly doubled the firing rate  
7 compared to both 2.5 ( $p=7.829 \times 10^{-4}$ ) and 10 mM glucose ( $p=4.303 \times 10^{-6}$ )  
8 conditions. Firing rate enhancement by lactate was dose-dependent ( $H_{(8,76)}=35.142$ ,  
9  $p=1.052 \times 10^{-5}$ ) and reached statistical significance above 5 mM (Figure 5C). We  
10 reasoned that this effect could be mediated by  $K_{ATP}$  channel closure. Indeed, the  
11 increase in firing rate by lactate ( $209 \pm 49\%$ ) was strongly reduced by the  $K_{ATP}$   
12 channel activator diazoxide ( $71 \pm 18\%$ ,  $p=3.346 \times 10^{-3}$ , Figure 5D). Tolbutamide  
13 reversed diazoxide's effect ( $160 \pm 17\%$ ,  $p=9.345 \times 10^{-3}$ ) but did not increase firing  
14 rate further ( $p=0.5076$ ). This occlusion of tolbutamide's effect by 15 mM lactate also  
15 suggests that this concentration reaches saturating levels and is the highest  
16 metabolic state that can be sensed by  $K_{ATP}$  channels. Enhancement of neuronal  
17 activity by lactate was also observed in Kir6.2<sup>+/+</sup> cortical neurons ( $147 \pm 25\%$ ,  
18  $p=2.840 \times 10^{-2}$ ) but not in Kir6.2<sup>-/-</sup> mice ( $112 \pm 32\%$ ,  $p=0.8785$ , Figure 5E). These  
19 observations indicate that lactate enhances neuronal activity via a closure of  $K_{ATP}$   
20 channels (Figure 5F).

21

## 22 **Mechanism of lactate-sensing**

23 To determine whether lactate-sensing involves intracellular lactate oxidative  
24 metabolism and/or extracellular activation of the lactate receptor GPR81, we next  
25 probed the expression of monocarboxylate transporters (MCT), which allow lactate  
26 uptake. Consistent with mouse RNAseq data (Zeisel et al., 2015;Tasic et al., 2016),  
27 MCT1 and MCT2 were the main transporters detected in rat cortical neurons by  
28 scRT-PCR, although with relatively low single cell detection rates (54 of 277, 19.5%  
29 and 78 of 277, 28.2%, for MCT1 and 2, respectively, Figure 6A and S5).

30 The expression of monocarboxylate transporters in cortical neurons is compatible  
31 with lactate uptake and metabolism leading to the closure of  $K_{ATP}$  channels and an  
32 increase in firing rate. We thus evaluated whether lactate uptake was needed for  
33 lactate-sensing. We used 250  $\mu$ M  $\alpha$ -cyano-4-hydroxycinnamic acid (4-CIN), a  
34 concentration blocking lactate uptake while only moderately altering mitochondrial

1 pyruvate carrier in brain slices (Schurr et al., 1999;Ogawa et al., 2005;Galeffi et al.,  
2 2007). 4-CIN reversed the increased firing rate induced by lactate (Figure 6B,  $T(9)=0$ ,  
3  $p=7.686 \times 10^{-3}$ ) indicating that facilitated lactate transport is required for  $K_{ATP}$  channel  
4 closure and in turn firing rate acceleration.

5 A mechanism of lactate-sensing involving an intracellular lactate oxidative  
6 metabolism would also require the expression of lactate dehydrogenase (LDH), that  
7 reversibly converts lactate and nicotinamide adenine dinucleotide ( $NAD^+$ ) to pyruvate  
8 and NADH (Figure 6E, inset). We thus also probed for the expression of LDH  
9 subunits. LDH-A and LDH-B were observed in a large majority of cortical neurons  
10 with LDH-A being more frequent in glutamatergic neurons than in GABAergic  
11 interneurons ( $p=1.61 \times 10^{-2}$ , Figure 6A and S5). Nonetheless, neuron subtypes  
12 analysis did not allow to disclose which populations express less frequently LDH-A.  
13 (Figure S5). To confirm the ability of cortical neurons to take up and oxidize lactate  
14 we also visualized NADH fluorescence dynamics (Chance et al., 1962) induced by  
15 bath application of lactate. Widefield somatic NADH fluorescence appeared as a  
16 diffuse labeling surrounding presumptive nuclei (Figure 6D). Consistent with lactate  
17 transport by MCTs and oxidization by LDH, NADH was increased under lactate  
18 application ( $U_{(61,67)}=196$ ,  $p=1.2 \times 10^{-18}$ , Figure 6E-F).

19 Since the lactate receptor GPR81 has been observed in the cerebral cortex  
20 (Lauritzen et al., 2014), lactate-sensing might also involve this receptor. This  
21 possibility was ruled out by the observation that pyruvate (15 mM), which is  
22 transported by MCTs (Broer et al., 1998;Broer et al., 1999) but does not activate  
23 GPR81 (Ahmed et al., 2010), enhanced firing rate to an extent similar to that of  
24 lactate (Figure 6C,  $U_{(16,6)}=43$ ,  $p=0.7468$ ). In line with its uptake and reduction,  
25 pyruvate also decreased NADH (Figure 6E-F,  $U_{(44,67)}=868$ ,  $p=2.08 \times 10^{-4}$ ).

26 The requirement of monocarboxylate transport and the similar effect of lactate and  
27 pyruvate on neuronal activity suggest that once taken up, lactate would be oxidized  
28 into pyruvate and metabolized by mitochondria to produce ATP, leading in turn to a  
29 closure of  $K_{ATP}$  channels and increased firing rate. The apparent absence of glucose  
30 responsiveness in cortical neurons also suggests that glycolysis contributes modestly  
31 to ATP production. To determine the relative contribution of glycolysis and oxidative  
32 phosphorylation to ATP synthesis, we transduced the genetically encoded  
33 fluorescence resonance energy transfer (FRET)-based ATP biosensor AT1.03<sup>YEMK</sup>  
34 (Imamura et al., 2009) using a recombinant Sindbis virus. AT1.03<sup>YEMK</sup> fluorescence

1 was mostly observed in pyramidal shaped cells (Figure 6G), consistent with the  
2 strong tropism of this viral vector towards pyramidal neurons (Piquet et al., 2018).  
3 Blocking glycolysis with 200  $\mu$ M iodoacetic acid (IAA) decreased modestly the FRET  
4 ratio by  $2.9 \pm 0.2\%$  (Figure 6H,  $p=2.55 \times 10^{-9}$ ). By contrast, adding potassium cyanide  
5 (KCN, 1mM), a respiratory chain blocker, reduced the FRET ratio to a much larger  
6 extent ( $52.3 \pm 0.6\%$ , Figure 6H,  $p=2.55 \times 10^{-9}$ ). KCN also induced a strong NADH  
7 fluorescence increase (Figure S6A-B,  $U_{(12,42)}=0$ ,  $p=5.83 \times 10^{-12}$ ), indicating a highly  
8 active oxidative phosphorylation in cortical neurons.

## 1 **DISCUSSION**

2 We report that extracellular lactate and pyruvate, but not glucose, enhance the  
3 activity of cortical neurons through a mechanism involving facilitated transport and  
4 the subsequent closure of  $K_{ATP}$  channels composed of Kir6.2 and SUR1 subunits.  
5 ATP synthesis derives mostly from oxidative phosphorylation and weakly from  
6 glycolysis in cortical neurons. Together with their ability to oxidize lactate by LDH,  
7 these observations suggest that lactate is a preferred energy substrate over glucose  
8 in cortical neurons. Besides its metabolic importance lactate also appears as a  
9 signaling molecule enhancing firing activity (Figure 7). This suggests that an efficient  
10 neurovascular and neurometabolic coupling could define a time window of an up  
11 state of lactate during which neuronal activity and plasticity would be locally  
12 enhanced (Suzuki et al., 2011; Jimenez-Blasco et al., 2020).

13

### 14 **$K_{ATP}$ channel subunits in cortical neurons**

15 Similarly to neurons of the hippocampal formation (Zawar et al., 1999; Cunningham et  
16 al., 2006; Sada et al., 2015) we found that, regardless of the neuronal type, most  
17 neocortical neurons express diazoxide-sensitive, but pinacidil-insensitive  $K_{ATP}$   
18 channels (Cao et al., 2009). In agreement with this pharmacological profile (Inagaki  
19 et al., 1996) and the absence of functional  $K_{ATP}$  channels in Kir6.2<sup>-/-</sup> neurons, we  
20 observed Kir6.2 and SUR1 subunits as the main components of  $K_{ATP}$  channels. Their  
21 low detection rate is presumably due to the low copy number of their mRNAs, as  
22 described in single cortical neurons from mice (Zeisel et al., 2015; Tasic et al., 2016),  
23 and making their observation by scRT-PCR challenging (Tsuzuki et al., 2001). Since  
24 Kir6.2 is an intronless gene, collection of the nucleus was avoided to prevent  
25 potential false positives. Thus, neurons positive for both Kir6.2 and somatostatin  
26 intron, taken as an indicator of genomic DNA (Hill et al., 2007; Devienne et al., 2018),  
27 were discarded from Kir6.2 expression analysis. Unavoidably, this procedure does  
28 reduce the amount of cytoplasm collected, thereby decreasing the detection rate of  
29 both Kir6.2 and SUR1.

30

31 Consistent with the preferred expression of Kir6.1 in mural and endothelial cells  
32 (Bondjers et al., 2006; Zeisel et al., 2015; Tasic et al., 2016; Aziz et al.,  
33 2017; Vanlandewijck et al., 2018; Saunders et al., 2018), this subunit was only  
34 observed in one out of 277 cortical neurons analyzed. Similarly, SUR2B, the SUR2

1 variant expressed in forebrain (Isomoto et al., 1996) and cortex (Figure S1), whose  
2 presence is largely restricted to vascular cells (Zeisel et al., 2015), was not observed  
3 in cortical neurons.

4

### 5 **Relative sensitivity of cortical neurons to glucose, lactate and pyruvate**

6 Consistent with previous observations (Yang et al., 1999), decreasing extracellular  
7 glucose from standard slice concentrations down to a normoglycemic level did not  
8 alter firing rates of cortical neurons. However, their activity is silenced during  
9 hypoglycemic episodes through  $K_{ATP}$  channels activation (Yang et al., 1999;Zawar  
10 and Neumcke, 2000;Molnar et al., 2014;Sada et al., 2015). This relative glucose  
11 unresponsiveness is in contrast with pancreatic beta cells and hypothalamic glucose-  
12 excited neurons whose activity is regulated over a wider range of glucose  
13 concentrations by  $K_{ATP}$  channels also composed with Kir6.2 and SUR1 subunits  
14 (Aguilar-Bryan et al., 1995;Inagaki et al., 1995a;Miki et al., 1998;Yang et al.,  
15 1999;Miki et al., 2001;Tarasov et al., 2006;Varin et al., 2015). The inability of cortical  
16 neurons to regulate their spiking activity at glucose levels beyond normoglycemia is  
17 likely due to the lack of glucokinase, a hexokinase which catalyzes the first step of  
18 glycolysis and acts as a glucose sensor in the millimolar range (German, 1993;Yang  
19 et al., 1999). As earlier reported, hexokinase-1 (HK1) is the major isoform in cortical  
20 neurons (Zeisel et al., 2015;Tasic et al., 2016;Piquet et al., 2018). Since this enzyme  
21 has a micromolar affinity for glucose and is inhibited by its product, glucose-6-  
22 phosphate (Wilson, 2003), HK1 is likely already saturated and/or inhibited during  
23 normoglycemia thereby limiting glycolysis. Nonetheless, HK1 saturation/inhibition can  
24 be mitigated when energy consumption is high (Attwell and Laughlin, 2001;Wilson,  
25 2003;Tantama et al., 2013), and then glucose can probably modulate neuronal  
26 activity via a high affinity mechanism, as evidenced by slow oscillations of spiking  
27 activity involving synaptic transmission (Cunningham et al., 2006) or by the use of  
28 glucose-free whole-cell patch-clamp solution (Kawamura, Jr. et al., 2010) that mimics  
29 high glucose consumption (Piquet et al., 2018;Diaz-Garcia et al., 2019).

30

31 Similarly to glucose-excited hypothalamic neurons (Yang et al., 1999;Song and  
32 Routh, 2005), but in contrast with pancreatic beta cells (Newgard and McGarry,  
33 1995), cortical neurons were dose-dependently excited by lactate. This lactate  
34 sensitivity is consistent with lactate transport and oxidization in hypothalamic and



1 cortical neurons (Ainscow et al., 2002;Sada et al., 2015;Diaz-Garcia et al., 2017)  
2 which are low in beta cells (Sekine et al., 1994;Pullen et al., 2011). Pyruvate had a  
3 similar effect to lactate in cortical neurons under normoglycemic condition whereas it  
4 only maintains the activity of hypothalamic glucose-excited neurons during  
5 hypoglycemia (Yang et al., 1999) and barely activates pancreatic beta cells (Dufer et  
6 al., 2002). Thus, cortical neurons display a peculiar metabolic sensitivity to  
7 monocarboxylates. Our data also suggest that under normoglycemic conditions a  
8 portion of  $K_{ATP}$  channels are open when cortical neurons fire action potentials.

9

### 10 **Mechanism of lactate-sensing**

11 Our pharmacological, molecular and genetic evidence indicates that the closure of  
12  $K_{ATP}$  channels is responsible for the firing rate enhancement by lactate. Since  $K_{ATP}$   
13 channels can be modulated by G protein-coupled receptors (Kawamura, Jr. et al.,  
14 2010), lactate-sensing might have been mediated by GPR81, a  $G_i$  protein-coupled  
15 lactate receptor expressed in the cerebral cortex (Lauritzen et al., 2014). This  
16 possibility is however unlikely since the activation of GPR81 inhibits cultured cortical  
17 neurons (Bozzo et al., 2013;de Castro Abrantes H. et al., 2019) and we show here  
18 that enhancing effect pyruvate on neuronal activity was similar to that of lactate,  
19 although pyruvate does not activate GPR81 (Ahmed et al., 2010).

20

21 We found that lactate-sensing was critically dependent on lactate transport and we  
22 confirmed the capacity of cortical neurons to take up and oxidize lactate (Bittar et al.,  
23 1996;Laughton et al., 2000;Bouzier-Sore et al., 2003;Wyss et al., 2011;Choi et al.,  
24 2012;Sada et al., 2015;Machler et al., 2016). LDH metabolites, including pyruvate  
25 and oxaloacetate, can lead to  $K_{ATP}$  channel closure (Dhar-Chowdhury et al.,  
26 2005;Sada et al., 2015) and could mediate lactate-sensing. An intermediate role of  
27 oxaloacetate in lactate-sensing is compatible with enhanced Krebs cycle and  
28 oxidative phosphorylation, which leads to an increased ATP/ADP ratio and the  
29 closure of  $K_{ATP}$  channels (Figure 7). In contrast to oxaloacetate, intracellular ATP was  
30 found to be ineffective for reverting  $K_{ATP}$  channel opening induced by LDH inhibition  
31 (Sada et al., 2015). Interestingly, hippocampal interneurons were found to be  
32 insensitive to glucose deprivation in whole cell configuration (Sada et al., 2015) but  
33 not in perforated patch configuration (Zawar and Neumcke, 2000) whereas almost  
34 the opposite was found in CA1 pyramidal cells. Whether altered intracellular

1 metabolism by whole-cell recording accounted for the apparent lack of ATP  
2 sensitivity remains to be determined.

3

#### 4 **Lactate as an energy substrate for neurons and an enhancer of spiking activity** 5 **and neuronal plasticity**

6 We confirmed that the ATP produced by cortical neurons was mostly derived from  
7 oxidative phosphorylation and marginally from glycolysis (Almeida et al., 2001; Hall et  
8 al., 2012). Together with the enhancement of spiking activity through  $K_{ATP}$  channels  
9 by lactate, but not by glucose, our data support both the notion that lactate is a  
10 preferred energy substrate over glucose for cortical neurons (Bouzier-Sore et al.,  
11 2003) and the astrocyte-neuron lactate shuttle hypothesis (Pellerin and Magistretti,  
12 1994). Although the local cellular origin of lactate has been recently questioned (Lee  
13 et al., 2012; Diaz-Garcia et al., 2017), a growing number of evidence indicates that  
14 astrocytes are major central lactate producers (Almeida et al., 2001; Choi et al.,  
15 2012; Sotelo-Hitschfeld et al., 2015; Karagiannis et al., 2015; Le Douce J. et al.,  
16 2020; Jimenez-Blasco et al., 2020).

17 Glutamatergic synaptic transmission stimulates blood glucose uptake, astrocyte  
18 glycolysis, as well as lactate release (Pellerin and Magistretti, 1994; Voutsinos-Porche  
19 et al., 2003; Ruminot et al., 2011; Choi et al., 2012; Sotelo-Hitschfeld et al.,  
20 2015; Lerchundi et al., 2015) and diffusion through the astroglial gap junctional  
21 network (Rouach et al., 2008). This indicates that local and fast glutamatergic  
22 synaptic activity would be translated by astrocyte metabolism into a widespread and  
23 long-lasting extracellular lactate increase (Prichard et al., 1991; Hu and Wilson,  
24 1997a), which could in turn enhance the firing of both excitatory and inhibitory  
25 neurons (Figure 7). Such a lactate surge would be spatially confined by the gap  
26 junctional connectivity of the astroglial network, which in layer IV represents an  
27 entire barrel (Houades et al., 2008).

28 This suggests that increased astrocytic lactate induced by whisker stimulation could  
29 enhance the activity of the cortical network and fine-tune upcoming sensory  
30 processing for several minutes, thereby favoring neuronal plasticity. Along this line,  
31 lactate derived from astrocyte glycogen supports both neuronal activity and long-term  
32 memory formation (Suzuki et al., 2011; Choi et al., 2012; Vezzoli et al., 2020).  
33 Similarly, cannabinoids, which notably alter neuronal processing and memory

1 formation (Stella et al., 1997), hamper lactate production by astrocytes (Jimenez-  
2 Blasco et al., 2020).  
3 Peripheral lactate produced by skeletal muscles during intense physical exercise and  
4 consumed by the active brain (Quistorff et al., 2008) could also have a similar but  
5 more global effect on neuronal processing and plasticity. Blood-borne lactate has  
6 been shown to promote learning and memory formation via brain-derived  
7 neurotrophic factor (El Hayek L. et al., 2019). It is worth noting that the production of  
8 this neurotrophin is altered in Kir6.2<sup>-/-</sup> mice and impaired by a K<sub>ATP</sub> channel opener  
9 (Fan et al., 2016), both conditions compromising the effect of lactate on spiking  
10 activity. Hence, the increase in astrocyte or systemic lactate could fine-tune neuronal  
11 processing and plasticity in a context-dependent manner and their coincidence could  
12 be potentially synergistic.

13

#### 14 **Lactate-sensing compensatory mechanisms**

15 Since excitatory neuronal activity increases extracellular lactate (Prichard et al.,  
16 1991;Hu and Wilson, 1997a) and lactate enhances neuronal activity, such a positive  
17 feedback loop (Figure 7) suggests that compensatory mechanisms might be  
18 recruited to prevent an overexcitation of neuronal activity by lactate supply. A  
19 metabolic negative feedback mechanism could involve the impairment of astrocyte  
20 metabolism and lactate release by endocannabinoids (Jimenez-Blasco et al., 2020)  
21 produced during intense neuronal activity (Stella et al., 1997).

22 Another possibility would consist in a blood flow decrease that would in turn reduce  
23 the delivery of blood glucose and subsequent local lactate production and release but  
24 also blood-borne lactate. Some GABAergic interneuron subtypes (Cauli et al.,  
25 2004;Uhlirva et al., 2016;Krawchuk et al., 2019), but also astrocytes (Girouard et al.,  
26 2010), can trigger vasoconstriction and blood flow decrease when their activity is  
27 increased. This could provide a negative hemodynamic feedback restricting spatially  
28 and temporally the increase of spiking activity by lactate.

29 PV-expressing and SOM-expressing interneurons exhibit higher mitochondrial  
30 content and apparent oxidative phosphorylation than pyramidal cells (Gulyas et al.,  
31 2006) suggesting that interneurons would more rapidly metabolize and sense lactate  
32 than pyramidal cells. These inhibitory GABAergic interneurons might therefore  
33 silence the cortical network, thereby providing a negative neuronal feedback loop.  
34 Active decrease in blood flow is associated with a decrease in neuronal activity

1 (Shmuel et al., 2002;Shmuel et al., 2006;Devor et al., 2007). Vasoconstrictive  
2 GABAergic interneurons may underlie for both processes and could contribute to  
3 returning the system to a low lactate state.

4

## 5 **Conclusion**

6 Our data indicate that lactate is both an energy substrate for cortical neurons and a  
7 signaling molecule enhancing their spiking activity. This suggests that a coordinated  
8 neurovascular and neurometabolic coupling would define a time window of an up  
9 state of lactate that, besides providing energy and maintenance to the cortical  
10 network, would fine-tune neuronal processing and favor, for example, memory  
11 formation (Suzuki et al., 2011;Kann et al., 2014;Galow et al., 2014;Jimenez-Blasco et  
12 al., 2020).

13

## 14 **ACKNOWLEDGMENTS**

15 This work was supported by grants from the Human Frontier Science Program  
16 (HFSP, RGY0070/2007, BC), the Agence Nationale pour la Recherche (ANR 2011  
17 MALZ 003 01, BC). AK was supported by a Fondation pour la Recherche Médicale  
18 fellowship (FDT20100920106). We thank the animal facility of the IBPS (Paris,  
19 France).

20

## 1 AUTHOR CONTRIBUTIONS

2 Conceptualization, T.G., J. Roeper and B.C.; Formal Analysis, J.N., B.C.;  
 3 Investigation, A.K., T.G., A.L., F.P., J.P., H.G., R.H., B.C., Resources, B.L., J.  
 4 Rossier, H.I., S.S., J. Roeper, B.C.; Writing –Original Draft, B.C.; Writing –Review &  
 5 Editing, J.N., B.L.G., R.E., D.L., B.L., J.F.S., J. Roeper, B.C., Visualization, A.K.,  
 6 B.C.; Supervision, B.C.; Project Administration, B.C., Funding Acquisition, B.C.

## 8 DECLARATION OF INTERESTS

9 The authors declare no competing interests.

10

## 11 STAR★METHODS

## 12 KEY RESOURCES TABLE

| REAGENT or RESOURCE                                                        | SOURCE                      | IDENTIFIER  |
|----------------------------------------------------------------------------|-----------------------------|-------------|
| Chemicals, Peptides, and Recombinant Proteins                              |                             |             |
| Kynurenic acid                                                             | Sigma-Aldrich               | K3375       |
| Potassium D-gluconate                                                      | Sigma-Aldrich               | G4500       |
| Magnesium chloride solution                                                | Sigma-Aldrich               | M1028       |
| EGTA                                                                       | Sigma-Aldrich               | E3889       |
| HEPES                                                                      | Sigma-Aldrich               | H4034       |
| Pinacidil monohydrate                                                      | Sigma-Aldrich               | P154        |
| Diazoxide                                                                  | Sigma-Aldrich               | D9035       |
| Tolbutamide                                                                | Sigma-Aldrich               | T0891       |
| Mn(III)tetrakis(1-methyl-4-pyridyl)porphyrin                               | Millipore                   | 475872      |
| Gramicidin from <i>Bacillus aneurinolyticus</i> ( <i>Bacillus brevis</i> ) | Sigma-Aldrich               | G5002       |
| Sodium L-lactate                                                           | Sigma-Aldrich               | L7022       |
| $\alpha$ -Cyano-4-hydroxycinnamic Acid                                     | Sigma-Aldrich               | C2020       |
| Sodium pyruvate                                                            | Sigma-Aldrich               | P2256       |
| Sodium iodoacetate                                                         | Sigma-Aldrich               | I2512       |
| Potassium cyanide                                                          | Sigma-Aldrich               | 60178       |
| Tetrodotoxin citrate                                                       | Latoxan Laboratory          | L8502       |
| Dithiothreitol                                                             | VWR                         | 443852A     |
| Primer "random"                                                            | Roche                       | 11034731001 |
| dNTPs                                                                      | GE Healthcare Life Sciences | 28-4065-52  |
| Mineral Oil                                                                | Sigma-Aldrich               | M5904       |
| RNasin Ribonuclease Inhibitors                                             | Promega                     | N2511       |
| SuperScript II Reverse Transcriptase                                       | Invitrogen                  | 18064014    |
| Taq DNA Polymerase                                                         | Qiagen                      | 201205      |
| Penicillin-Streptomycin                                                    | Sigma-Aldrich               | P4333-100ML |
| MEGAscript™ SP6 Transcription Kit                                          | Ambion                      | AM1330      |
| Experimental Models: Cell Lines                                            |                             |             |
| Baby hamster kidney-21                                                     | ATCC                        | CCL-10      |

| Experimental Models: Organisms/Strains                                        |                            |             |
|-------------------------------------------------------------------------------|----------------------------|-------------|
| Rat: Wistar                                                                   | Janvier Labs               | jHan:W1     |
| Mouse: Wild type C57BL/6RJ                                                    | Janvier Labs               | C57BL/6RJ   |
| Mouse: Kir6.2 knockout (KO)                                                   | Miki et al., 1998          | MGI:2178821 |
| Oligonucleotides                                                              |                            |             |
| PCR primer rat vGluT1 external sense:<br>5'-GGCTCCTTTTTCTGGGGGTAC-3'          | (Gallopín et al., 2006)    | N/A         |
| PCR primer rat/mouse vGluT1 external antisense:<br>5'-CCAGCCGACTCCGTTCTAAG-3' | (Gallopín et al., 2006)    | N/A         |
| PCR primer rat vGluT1 internal sense:<br>5'-TGGGGGTACATTGTCACCTAGA-3'         | (Gallopín et al., 2006)    | N/A         |
| PCR primer rat vGluT1 internal antisense:<br>5'-ATGGCAAGCAGGGTATGTGAC-3'      | (Gallopín et al., 2006)    | N/A         |
| PCR primer rat/mouse GAD65 external sense:<br>5'-CCAAAAGTTCACGGGCGG-3'        | (Karagiannis et al., 2009) | N/A         |
| PCR primer rat/mouse GAD65 external antisense:<br>5'-TCCTCCAGATTTTGCAGTTG-3'  | (Karagiannis et al., 2009) | N/A         |
| PCR primer rat GAD65 internal sense:<br>5'-TGAGAAGCCAGCAGAGAGCG-3'            | (Karagiannis et al., 2009) | N/A         |
| PCR primer rat GAD65 internal antisense:<br>5'-TGGGGTAATGGAAATCAATCACTT-3'    | (Karagiannis et al., 2009) | N/A         |
| PCR primer rat GAD67 external sense:<br>5'-ATGATACTTGGTGTGGCGTAGC-3'          | (Karagiannis et al., 2009) | N/A         |
| PCR primer rat GAD67 external antisense:<br>5'-GTTTGCTCCTCCCGTCTTAG-3'        | (Karagiannis et al., 2009) | N/A         |
| PCR primer rat GAD67 internal sense:<br>5'-CAATAGCCTGGAAGAGAAGAGTCG-3'        | (Karagiannis et al., 2009) | N/A         |
| PCR primer rat GAD67 internal antisense:<br>5'-GTTTGCTCCTCCCGTCTTAG-3'        | (Karagiannis et al., 2009) | N/A         |
| PCR primer rat NOS-1 external sense:<br>5'-CCTGGGGCTCAAATGGTATG-3'            | (Karagiannis et al., 2009) | N/A         |
| PCR primer rat NOS-1 external antisense:<br>5'-CACAAATCCACACCAGTCGG-3'        | (Karagiannis et al., 2009) | N/A         |
| PCR primer rat NOS-1 internal sense:<br>5'-CCTCCCGCTGTGTCCAA-3'               | (Karagiannis et al., 2009) | N/A         |
| PCR primer rat NOS-1 internal antisense:<br>5'-GAGTGGTGGTCAACGATGGTCA-3'      | (Karagiannis et al., 2009) | N/A         |
| PCR primer rat CB external sense:<br>5'-GAAAGAAGGCTGGATTGGAG-3'               | (Karagiannis et al., 2009) | N/A         |
| PCR primer rat CB external antisense:<br>5'-CCCACACATTTTGATTCCCTG-3'          | (Karagiannis et al., 2009) | N/A         |
| PCR primer rat CB internal sense:<br>5'-ATGGGCAGAGAGATGATGGG-3'               | (Karagiannis et al., 2009) | N/A         |
| PCR primer rat CB internal antisense:<br>5'-TATCATCCACGGTCTTGTTC-3'           | (Karagiannis et al., 2009) | N/A         |
| PCR primer rat NOS-1 internal antisense:<br>5'-GAGTGGTGGTCAACGATGGTCA-3'      | (Karagiannis et al., 2009) | N/A         |
| PCR primer rat PV external sense:<br>5'-GCCTGAAGAAAAGAGTGCGG-3'               | (Karagiannis et al., 2009) | N/A         |
| PCR primer rat PV external antisense:<br>5'-GTCCCGTCTTGTCTCCAG-3'             | (Karagiannis et al., 2009) | N/A         |
| PCR primer rat PV internal sense:<br>5'-GCGGATGATGTGAAGAAGGTG-3'              | (Karagiannis et al., 2009) | N/A         |
| PCR primer rat PV internal antisense:<br>5'-CAGCCATCAGCGTCTTTGTT-3'           | (Karagiannis et al., 2009) | N/A         |
| PCR primer rat CR external sense:<br>5'-TTGATGCTGACGAAATGGGTA-3'              | (Karagiannis et al., 2009) | N/A         |
| PCR primer rat CR external antisense:<br>5'-CAAGCCTCCATAAACTCAGCG-3'          | (Karagiannis et al., 2009) | N/A         |
| PCR primer rat CR internal sense:<br>5'-GCTGGAGAAGGCAAGGAAAGG-3'              | (Karagiannis et al., 2009) | N/A         |
| PCR primer rat CR internal antisense:<br>5'-ATTCTCTCGGTTGGCAGGA-3'            | (Karagiannis et al., 2009) | N/A         |
| PCR primer rat NPY external sense:<br>5'-CGAATGGGGCTGTGTGGA-3'                | (Karagiannis et al., 2009) | N/A         |
| PCR primer rat NPY external antisense:<br>5'-AGTTTCATTTCCCATCACCACAT-3'       | (Karagiannis et al., 2009) | N/A         |
| PCR primer rat NPY internal sense:<br>5'-CCCTCGCTCTATCCCTGCTC-3'              | (Karagiannis et al., 2009) | N/A         |



|                                                                                 |                            |     |
|---------------------------------------------------------------------------------|----------------------------|-----|
| PCR primer rat NPY internal antisense:<br>5'-GTTCTGGGGGCATTTTCTGTG-3'           | (Karagiannis et al., 2009) | N/A |
| PCR primer rat VIP external sense:<br>5'-TTATGATGTGTCCAGAAATGCCGAG-3'           | (Karagiannis et al., 2009) | N/A |
| PCR primer rat VIP external antisense:<br>5'- TTTTATTTGGTTTTGCTATGGAAG-3'       | (Karagiannis et al., 2009) | N/A |
| PCR primer rat VIP internal sense:<br>5'-TGGCAAACGAATCAGCAGTAGC-3'              | (Karagiannis et al., 2009) | N/A |
| PCR primer rat VIP internal antisense:<br>5'-GAATCTCCCTCACTGCTCCTCT-3'          | (Karagiannis et al., 2009) | N/A |
| PCR primer rat SOM external sense:<br>5'-ATGCTGCTCCTGCCGTCTCCA-3'               | (Karagiannis et al., 2009) | N/A |
| PCR primer rat SOM external antisense:<br>5'-GCCTCATCTCGTCCGTCTCA-3'            | (Férézou et al., 2007)     | N/A |
| PCR primer rat SOM internal sense:<br>5'-GCATCGTCCCTGGCTTTGGG-3'                | (Karagiannis et al., 2009) | N/A |
| PCR primer rat SOM internal antisense:<br>5'-AGGCTCCAGGGCATCGTTCT-3'            | (Karagiannis et al., 2009) | N/A |
| PCR primer rat CCK external sense:<br>5'-TGTCTGTGCGTGGTGATGGC-3'                | (Karagiannis et al., 2009) | N/A |
| PCR primer rat CCK external antisense:<br>5'-GCATAGCAACATTAGGTCTGGGAG-3'        | (Karagiannis et al., 2009) | N/A |
| PCR primer rat CCK internal sense:<br>5'-ATACATCCAGCAGGTCCGCAA-3'               | (Karagiannis et al., 2009) | N/A |
| PCR primer rat CCK internal antisense:<br>5'-GGTCGTGTGCGTGGTTGTTT-3'            | (Karagiannis et al., 2009) | N/A |
| PCR primer rat Kir6.1 external sense:<br>5'-CTGGCTCACAAAGACATCCG-3'             | This paper                 | N/A |
| PCR primer rat Kir6.1 external antisense:<br>5'- AGCGTCTCTGCCCTTCTGTG-3'        | This paper                 | N/A |
| PCR primer rat Kir6.1 internal sense:<br>5'-GCTGGCTGCTCTTCGCTATC-3'             | (Varin et al., 2015)       | N/A |
| PCR primer rat Kir6.1 internal antisense:<br>5'-TTCTCCCTCCAAACCCAATG-3'         | This paper                 | N/A |
| PCR primer rat Kir6.2 external sense:<br>5'-CCCCACACGCTGCTCATTTC-3'             | This paper                 | N/A |
| PCR primer rat Kir6.2 external antisense:<br>5'-AGGAGCCAGGTCGTAGAGCG-3'         | This paper                 | N/A |
| PCR primer rat Kir6.2 internal sense:<br>5'-GCGTCACAAGCATCCACTCC-3'             | This paper                 | N/A |
| PCR primer rat Kir6.2 internal antisense:<br>5'-CCACCCACACCGTTCTCCAT-3'         | This paper                 | N/A |
| PCR primer rat SUR1 external sense:<br>5'-GGTGAAGAAGCCTCCGATGA-3'               | This paper                 | N/A |
| PCR primer rat SUR1 external antisense:<br>5'-GGTGAAGAAGCCTCCGATGA-3'           | This paper                 | N/A |
| PCR primer rat SUR1 internal sense:<br>5'-GGTTCCGGTCCACTGTCAAGG-3'              | This paper                 | N/A |
| PCR primer rat SUR1 internal antisense:<br>5'-GTCAGCGTCTCCATCCGTGC-3'           | This paper                 | N/A |
| PCR primer rat SUR2 external sense:<br>5'-CGCTGCCTTTTGAGTCCTGT-3'               | This paper                 | N/A |
| PCR primer rat SUR2 external antisense:<br>5'- GATGGCAAGGAGGAGAGACG -3'         | This paper                 | N/A |
| PCR primer rat SUR2 internal sense:<br>5'-TGGACAACACTACGAGCAGGCG-3'             | This paper                 | N/A |
| PCR primer rat SUR2 internal antisense:<br>5'-CACAAACCCACCTGACCCACA-3'          | This paper                 | N/A |
| PCR primer rat SOM intron external sense:<br>5'-GGAAATGGCTGGACTCGTC-3'          | (Hill et al., 2007)        | N/A |
| PCR primer rat SOM intron external antisense:<br>5'-AAACCATGGATGATAGGAAGTCGT-3' | (Hill et al., 2007)        | N/A |
| PCR primer rat SOM intron internal sense:<br>5'-GTCCCCTTTGCCAATCCCT-3'          | This paper                 | N/A |
| PCR primer rat SOM intron internal antisense:<br>5'-TTCGAGCAGCTCCATTTTCC-3'     | This paper                 | N/A |
| PCR primer rat SUR2A/B sense:<br>5'-ACTTCAGCGTTGGACAGAGACA-3'                   | This paper                 | N/A |
| PCR primer rat SUR2A/B antisense:<br>5'-GGTCAGCAGTCAGAATGGTGTG-3'               | This paper                 | N/A |
| PCR primer mouse vGluT1 external sense:<br>5'-GGCTCCTTTTTCTGGGGCTAC-3'          | (Cabezas et al., 2013)     | N/A |

|                                                                               |                              |     |
|-------------------------------------------------------------------------------|------------------------------|-----|
| PCR primer mouse vGluT1 internal sense:<br>5'-ATTTCGACGCAACAGGGTCT-3'         | (Cabezas et al., 2013)       | N/A |
| PCR primer mouse vGluT1 internal antisense:<br>5'-TGGCAAGCAGGGTATGTGAC-3'     | (Cabezas et al., 2013)       | N/A |
| PCR primer mouse GAD65 internal sense:<br>5'-CACCTGCGACCAAAAACCT-3'           | (Perrenoud et al., 2012)     | N/A |
| PCR primer mouse GAD65 internal antisense:<br>5'-GATTTTGGGTTGGTCTGCC-3'       | (Perrenoud et al., 2012)     | N/A |
| PCR primer mouse GAD67 external sense:<br>5'-TACGGGGTTCGCACAGGTC-3'           | (Férézou et al., 2002)       | N/A |
| PCR primer mouse GAD67 external antisense:<br>5'-CCCAGGCAGCATCCACAT-3'        | (Cabezas et al., 2013)       | N/A |
| PCR primer mouse GAD67 internal sense:<br>5'-CCCAGAAGTGAAGACAAAAGGC-3'        | (Cabezas et al., 2013)       | N/A |
| PCR primer mouse GAD67 internal antisense:<br>5'-AATGCTCCGTAACAGTCGTGC-3'     | (Cabezas et al., 2013)       | N/A |
| PCR primer mouse ATP1α1 external sense:<br>5'-CAGGGCAGTGTTCAGGCTAA-3'         | (Devienne et al., 2018)      | N/A |
| PCR primer mouse ATP1α1 external antisense:<br>5'-CCGTGGAGAAGGATGGAGC-3'      | (Devienne et al., 2018)      | N/A |
| PCR primer mouse ATP1α1 internal sense:<br>5'-TAAGCGGGCAGTAGCGGG-3'           | (Devienne et al., 2018)      | N/A |
| PCR primer mouse ATP1α1 internal antisense:<br>5'-AGGTGTTTGGGCTCAGATGC-3'     | (Devienne et al., 2018)      | N/A |
| PCR primer mouse ATP1α2 external sense:<br>5'-AGTGAGGAAGATGAGGGACAGG-3'       | (Devienne et al., 2018)      | N/A |
| PCR primer mouse ATP1α2 external antisense:<br>5'-ACAGAAGCCCAGCACTCGTT-3'     | (Devienne et al., 2018)      | N/A |
| PCR primer mouse ATP1α2 internal sense:<br>5'-AAATCCCCCTCAACTCCACCA-3'        | (Devienne et al., 2018)      | N/A |
| PCR primer mouse ATP1α2 internal antisense:<br>5'-GTTCCCCAAGTCCTCCCAGC-3'     | (Devienne et al., 2018)      | N/A |
| PCR primer mouse ATP1α3 external sense:<br>5'-CGGAAATACAATACTGACTGCGTG-3'     | (Devienne et al., 2018)      | N/A |
| PCR primer mouse ATP1α3 external antisense:<br>5'-GTCATCCTCCGTCCTGCC-3'       | (Devienne et al., 2018)      | N/A |
| PCR primer mouse ATP1α3 internal sense:<br>5'-TGACACACAGTAAAGCCCAGGA-3'       | (Devienne et al., 2018)      | N/A |
| PCR primer mouse ATP1α3 internal antisense:<br>5'-CCACAGCAGGATAGAGAAGCCA-3'   | (Devienne et al., 2018)      | N/A |
| PCR primer mouse Kir6.2 external sense:<br>5'-CGGAGAGGGCACC AATGT-3'          | (Devienne et al., 2018)      | N/A |
| PCR primer mouse Kir6.2 external antisense:<br>5'-CACCCACGCCATTCTCCA-3'       | (Devienne et al., 2018)      | N/A |
| PCR primer mouse Kir6.2 internal sense:<br>5'-CATCCACTCCTTTTCATCTGCC-3'       | (Devienne et al., 2018)      | N/A |
| PCR primer mouse Kir6.2 internal antisense:<br>5'-TCGGGGCTGGTGGTCTTG-3'       | (Devienne et al., 2018)      | N/A |
| PCR primer mouse SUR1 external sense:<br>5'-CAGTGTGCCCCCGAGAG-3'              | (Devienne et al., 2018)      | N/A |
| PCR primer mouse SUR1 external antisense:<br>5'-GGTCTTCTCCCTCGCTGTCTG-3'      | (Devienne et al., 2018)      | N/A |
| PCR primer mouse SUR1 internal sense:<br>5'-ATCATCGGAGGCTTCTTACC-3'           | (Devienne et al., 2018)      | N/A |
| PCR primer mouse SUR1 internal antisense:<br>5'-GGTCTTCTCCCTCGCTGTCTG-3'      | (Devienne et al., 2018)      | N/A |
| PCR primer mouse SOM intron external sense:<br>5'-CTGTCCCCCTTACGAATCCC-3'     | (Thoby-Brisson et al., 2003) | N/A |
| PCR primer mouse SOM intron external antisense:<br>5'-CCAGCACCAGGGATAGAGCC-3' | (Thoby-Brisson et al., 2003) | N/A |
| PCR primer mouse SOM intron internal sense:<br>5'-CTTACGAATCCCCAGCCTT-3'      | (Cea-del Rio et al., 2010)   | N/A |
| PCR primer mouse SOM intron internal antisense:<br>5'-TTGAAAGCCAGGGAGGAACT-3' | (Cea-del Rio et al., 2010)   | N/A |
| PCR primer rat MCT1 external sense:<br>5'-GTCAGCCTTCTCCTTTCCA-3'              | This paper                   | N/A |
| PCR primer rat MCT1 external antisense:<br>5'-TCCGCTTCTGTTCTTTGGC-3'          | This paper                   | N/A |
| PCR primer rat MCT1 internal sense:<br>5'-TTGTTGCGAATGGAGTGTGC-3'             | This paper                   | N/A |
| PCR primer rat MCT1 internal antisense:<br>5'-CAGCCACAAGCCCAGTATG-3'          | This paper                   | N/A |

|                                                                          |                           |                                                                                                                         |
|--------------------------------------------------------------------------|---------------------------|-------------------------------------------------------------------------------------------------------------------------|
| PCR primer rat MCT2 external sense:<br>5'-GCGAAGTCTAAAAGTAAGGTTGGC-3'    | This paper                | N/A                                                                                                                     |
| PCR primer rat MCT2 external antisense:<br>5'-ATTTACCAGCCAGGGGAGGG-3'    | This paper                | N/A                                                                                                                     |
| PCR primer rat MCT2 internal sense:<br>5'-CCGTATGCTAAGGACAAAGGAGT-3'     | This paper                | N/A                                                                                                                     |
| PCR primer rat MCT2 internal antisense:<br>5'-GGGAAGAACTGGGCAACACT-3'    | This paper                | N/A                                                                                                                     |
| PCR primer rat MCT4 external sense:<br>5'-CATTGGTCTCGTGCTGT-3'           | This paper                | N/A                                                                                                                     |
| PCR primer rat MCT4 external antisense:<br>5'-CCCCGTTTTTCTCAGGCTCT-3'    | This paper                | N/A                                                                                                                     |
| PCR primer rat MCT4 internal sense:<br>5'-TGTGGCTGTGCTCATCGGAC-3'        | This paper                | N/A                                                                                                                     |
| PCR primer rat MCT4 internal antisense:<br>5'-CCTCTTCCCTTCCCGATGC-3'     | This paper                | N/A                                                                                                                     |
| PCR primer rat LDH-A external sense:<br>5'-GAAGAACAGGTCCCCCAGAA-3'       | This paper                | N/A                                                                                                                     |
| PCR primer rat LDH-A external antisense:<br>5'-GGGTTTGAGACGATGAGCAGT-3'  | This paper                | N/A                                                                                                                     |
| PCR primer rat LDH-A internal sense:<br>5'-CAGTTGTTGGGGTTGGTGCT-3'       | This paper                | N/A                                                                                                                     |
| PCR primer rat LDH-A internal antisense:<br>5'-TCTCTCCCTTTGCTGACGG-3'    | This paper                | N/A                                                                                                                     |
| PCR primer rat LDH-B external sense:<br>5'-ACTGCCGTCCCGAACAA-3'          | This paper                | N/A                                                                                                                     |
| PCR primer rat LDH-B external antisense:<br>5'-ACTCTCCCCTCCTGCTGG-3'     | This paper                | N/A                                                                                                                     |
| PCR primer rat LDH-B internal sense:<br>5'-TCTGGGGAAGTCTCTGGCTGA-3'      | This paper                | N/A                                                                                                                     |
| PCR primer rat LDH-B internal antisense:<br>5'-TTGGCTGTACGGAGTAATCTTT-3' | This paper                | N/A                                                                                                                     |
| Recombinant DNA                                                          |                           |                                                                                                                         |
| pcDNA-Ateam1.03YEMK                                                      | (Imamura et al., 2009)    | N/A                                                                                                                     |
| pSinRep5 plasmid                                                         | Invitrogen                | K750-01                                                                                                                 |
| pDH(26S) helper plasmid                                                  | Invitrogen                | K750-01                                                                                                                 |
| Software and Algorithms                                                  |                           |                                                                                                                         |
| Pclamp 10.2                                                              | Molecular Devices         | <a href="https://www.moleculardevices.com">https://www.moleculardevices.com</a>                                         |
| Matlab 2018b                                                             | MathWorks                 | <a href="https://fr.mathworks.com/">https://fr.mathworks.com/</a>                                                       |
| Statistica 6.1                                                           | Statsoft                  | <a href="http://www.statsoft.com/Products/STATISTICA-Features">http://www.statsoft.com/Products/STATISTICA-Features</a> |
| GraphPad Prism 7                                                         | GraphPad                  | <a href="https://www.graphpad.com/">https://www.graphpad.com/</a>                                                       |
| ImagingWorkbench 6.0.25                                                  | INDEC Systems             | <a href="http://www.indecbiosystems.com">http://www.indecbiosystems.com</a>                                             |
| FIJI                                                                     | (Schindelin et al., 2012) | <a href="https://fiji.sc/Fiji">https://fiji.sc/Fiji</a>                                                                 |
| Image-Pro Analyzer 7.0                                                   | MediaCybernetics          | <a href="http://www.mediacy.com/">http://www.mediacy.com/</a>                                                           |
| Other                                                                    |                           |                                                                                                                         |
| VT1000S                                                                  | Leica                     | N/A                                                                                                                     |
| BX51WI                                                                   | Olympus                   | N/A                                                                                                                     |
| WI-DPMC                                                                  | Olympus                   | N/A                                                                                                                     |
| LUMPlan FI /IR 60x/0.90 W                                                | Olympus                   | N/A                                                                                                                     |
| LUMPlan FI /IR 40x/0.80 W                                                | Olympus                   | N/A                                                                                                                     |
| CoolSnap HQ2                                                             | Roper Scientific          | N/A                                                                                                                     |
| Axopatch 200B                                                            | Molecular Devices         | N/A                                                                                                                     |
| Digidata 1440A                                                           | Molecular Devices         | N/A                                                                                                                     |
| S900 stimulator                                                          | Dagan corporation         | N/A                                                                                                                     |
| pE-2                                                                     | CoolLED                   | N/A                                                                                                                     |
| FF395/495/610-Di01-25x36                                                 | Semrock                   | N/A                                                                                                                     |
| FF01-425/527/685-25                                                      | Semrock                   | N/A                                                                                                                     |
| 780 nm Collimated LED                                                    | Thorlabs                  | M780L3-C1                                                                                                               |
| Dotd Gradient Contrast                                                   | Luigs and Neumann         | 200-100 200 0155                                                                                                        |
| 725 DCSPXR                                                               | Semrock                   | N/A                                                                                                                     |
| XC ST-70 CE                                                              | Sony                      | N/A                                                                                                                     |

|                  |                    |           |
|------------------|--------------------|-----------|
| Millicell        | Millipore          | PICM0RG50 |
| FF02-438/24-25   | Semrock            | N/A       |
| FF458-Di02-25x36 | Semrock            | N/A       |
| FF01-483/32-25   | Semrock            | N/A       |
| FF01-542/27-25   | Semrock            | N/A       |
| Lambda 10B       | Sutter Instruments | N/A       |

1 **LEAD CONTACT AND MATERIALS AVAILABILITY**

2 Further information and requests for resources and reagents should be directed to,  
3 and will be fulfilled by, the lead contact, B. Cauli ([bruno.cauli@upmc.fr](mailto:bruno.cauli@upmc.fr)).

4  
5 **EXPERIMENTAL MODEL AND SUBJECT DETAILS**

6 Wistar rats, C57BL/6RJ or Kir6.2 KO mice were used for all experiments in  
7 accordance with French regulations (Code Rural R214/87 to R214/130) and  
8 conformed to the ethical guidelines of both the European Economic Community  
9 (86/609/EEC) and the French National Charter on the ethics of animal  
10 experimentation. A maximum of 3 rats or 5 mice were housed per cage and single  
11 animal housing was avoided. Male rats and mice of both genders were housed on a  
12 12-hour light/dark cycle in a temperature-controlled (21–25°C) room and were given  
13 food and water *ad libitum*. Animals were used for experimentation at 13-24 days of  
14 age.

## 1 **METHOD DETAILS**

### 2 **Cortical slice preparation**

3 Rats or mice were deeply anesthetized with isoflurane. After decapitation brains were  
4 quickly removed and placed into cold (~4°C) oxygenated artificial cerebrospinal fluid  
5 (aCSF) containing (in mM): 126 NaCl, 2.5 KCl, 1.25 NaH<sub>2</sub>PO<sub>4</sub>, 2 CaCl<sub>2</sub>, 1 MgCl<sub>2</sub>, 26  
6 NaHCO<sub>3</sub>, 10 glucose, 15 sucrose, and 1 kynurenic acid. Coronal slices (300 µm  
7 thick) containing the barrel cortex were cut with a vibratome (VT1000S, Leica) and  
8 allowed to recover at room temperature for at least 1h in aCSF saturated with O<sub>2</sub>/CO<sub>2</sub>  
9 (95 %/5 %) as previously described (Karagiannis et al., 2009;Devienne et al., 2018).

10

### 11 **Whole-cell patch-clamp recording**

12 Patch pipettes (4-6 MΩ) pulled from borosilicate glass were filled with 8 µl of RNAse  
13 free internal solution containing in (mM): 144 K-gluconate, 3 MgCl<sub>2</sub>, 0.5 EGTA, 10  
14 HEPES, pH 7.2 (285/295 mOsm). Whole-cell recordings were performed at 25.3 ±  
15 0.2°C using a patch-clamp amplifier (Axopatch 200B, Molecular Devices). Data were  
16 filtered at 5-10 kHz and digitized at 50 kHz using an acquisition board (Digidata 1440,  
17 Molecular Devices) attached to a personal computer running pCLAMP 10.2 software  
18 package (Molecular Devices). For ATP washout experiments neurons were recorded  
19 in voltage clamp mode using an ATP-free internal solution containing in (mM): 140  
20 KCl, 20 NaCl, 2 MgCl<sub>2</sub>, 10 EGTA, 10 HEPES, pH 7.2.

21

### 22 **Cytoplasm harvesting and scRT-PCR**

23 At the end of the whole-cell recording, lasting less than 15 min, the cytoplasmic  
24 content was aspirated in the recording pipette. The pipette's content was expelled  
25 into a test tube and reverse transcription (RT) was performed in a final volume of 10  
26 µl, as described previously (Lambolez et al., 1992). The scRT-PCR protocol was  
27 designed to probe simultaneously the expression of neuronal markers, K<sub>ATP</sub> channels  
28 subunits or some key elements of energy metabolism. Two-steps amplification was  
29 performed essentially as described (Cauli et al., 1997;Devienne et al., 2018). Briefly,  
30 cDNAs present in the 10 µl reverse transcription reaction were first amplified  
31 simultaneously using all external primer pairs listed in the Key Ressources Table.  
32 Taq polymerase and 20 pmol of each primer were added to the buffer supplied by the  
33 manufacturer (final volume, 100 µl), and 20 cycles (94°C, 30 s; 60°C, 30 s; 72°C, 35  
34 s) of PCR were run. Second rounds of PCR were performed using 1 µl of the first

1 PCR product as a template. In this second round, each cDNA was amplified  
2 individually using its specific nested primer pair (Key Resources Table) by  
3 performing 35 PCR cycles (as described above). 10  $\mu$ l of each individual PCR  
4 product were run on a 2 % agarose gel stained with ethidium bromide using  $\Phi$ X174  
5 digested by *Hae*III as a molecular weight marker.

6

### 7 **Perforated patch-clamp recording**

8 Gramicidin stock solution (2 mg/ml, Sigma-Aldrich) was prepared in DMSO and  
9 diluted to 10-20  $\mu$ g/ml (Zawar and Neumcke, 2000) in the RNase free internal  
10 solution described above. The pipette tip was filled with gramicidin-free solution.  
11 Progress in perforation was evaluated by monitoring the capacitive transient currents  
12 elicited by -10 mV voltage pulses from a holding potential of -60 mV. In perforated  
13 patch configuration, a continuous current ( $52 \pm 7$  pA) was injected to induce the  
14 spiking of action potentials at stable firing rates of  $4.1 \pm 0.4$  Hz obtained after an  
15 equilibration period of  $3.6 \pm 0.5$  min. Membrane and access resistance were  
16 continuously monitored by applying -50 pA hyperpolarizing current pulses lasting 1 s  
17 every 10 s using an external stimulator (S900, Dagan) connected to the amplifier.  
18 Recordings were stopped when going into whole-cell configuration occurred, as  
19 evidenced by sudden increase of spike amplitude and decrease of access  
20 resistance.

21

### 22 **NADH imaging**

23 Recordings were made in layer II-III of the rat somatosensory cortex. Wide-field  
24 fluorescent images were obtained using a double port upright microscope BX51WI,  
25 WI-DPMC, Olympus) with a 60x objective (LUMPlan FI /IR 60x/0.90 W, Olympus)  
26 and a digital camera (CoolSnap HQ2, Roper Scientific) attached on the front port of  
27 the microscope. NADH autofluorescence was obtained by 365 nm excitation with a  
28 Light Emitting Device (LED, pE-2, CoolLED) using Imaging Workbench 6.0.25  
29 software (INDEC Systems) and dichroic (FF395/495/610-Di01-25x36, Semrock) and  
30 emission filters (FF01-425/527/685-25, Semrock). Infrared Dodt gradient contrast  
31 images (IR-DGC, (Dodt and Zieglgansberger, 1998)) were obtained using a 780 nm  
32 collimated LED (M780L3-C1, Thorlabs) as a transmitted light source and DGC optics  
33 (Luigs and Neumann). Autofluorescence and IR-DGC images were collected every  
34 10s by alternating the fluorescence and transmitted light sources. In parallel, infrared



1 transmitted light images of slices were also continuously monitored on the back-port  
2 of the microscope using a customized beam splitter (725 DCSPXR, Semrock) and an  
3 analogic CCD camera (XC ST-70 CE, Sony). The focal plane was maintained  
4 constant on-line using infrared DGC images of cells as anatomical landmarks  
5 (Lacroix et al., 2015).

6

### 7 **Subcloning and viral production**

8 The coding sequence of the ATP sensor ATeam1.03YEMK (Imamura et al., 2009)  
9 was subcloned into the viral vector pSinRep5. Sindbis virus was produced as  
10 previously described (Piquet et al., 2018). Recombinant pSinRep5 and helper  
11 plasmid pDH26S (Invitrogen) were transcribed in vitro into capped RNA using the  
12 Megascript SP6 kit (Ambion). Baby hamster kidney-21 cells (ATCC) were  
13 electroporated with sensor-containing RNA and helper RNA ( $2 \cdot 10^7$  cells, 950  $\mu$ F, 230  
14 V) and incubated for 24 h at 37°C in 5% CO<sub>2</sub> in Dulbecco's modified Eagle Medium  
15 supplemented with 5% fetal calf serum before collecting cell supernatant containing  
16 the viruses. The virus titer ( $10^8$  infectious particles/ml) was determined after counting  
17 fluorescent baby hamster kidney cells infected using serial dilution of the stock virus.

18

### 19 **Brain slice viral transduction**

20 Brain slices were placed onto a millicell membrane (Millipore) with culture medium  
21 (50% minimum essential medium, 50% Hank's balanced salt sodium, 6.5 g/l glucose  
22 and 100 U/ml penicillin-streptomycin (Sigma-Aldrich) as previously described (Piquet  
23 et al., 2018). Infection was performed by adding  $\sim 5 \times 10^5$  particles per slice. Slices  
24 were incubated overnight at 35°C in 5% CO<sub>2</sub>. The next morning, brain slices were  
25 equilibrated for 1h in aCSF containing (in mM): 126 NaCl, 2.5 KCl, 1.25 NaH<sub>2</sub>PO<sub>4</sub>, 2  
26 CaCl<sub>2</sub>, 1 MgCl<sub>2</sub>, 26 NaHCO<sub>3</sub>, 10 glucose, 15 sucrose. Slices were then placed into  
27 the recording chamber, heated at  $\sim 30$  °C and continuously perfused at 1-2 ml/min.

28

### 29 **FRET imaging**

30 Recordings were made from visually identified pyramidal cells in layer II-III of the rat  
31 somatosensory cortex. Wide-field fluorescent images were obtained using a 40x  
32 objective and a digital camera attached on the front port of the microscope. The ATP  
33 sensor ATeam1.03YEMK was excited at 400 nm with a LED using Imaging  
34 Workbench 6.0.25 software and excitation (FF02-438/24-25, Semrock) and dichroic

1 filters (FF458-Di02-25x36, Semrock). Double fluorescence images were collected  
2 every 15s by alternating the fluorescence emission filters for the CFP (FF01-483/32-  
3 25, Semrock) and the YFP (FF01-542/27-25, Semrock) using a filter wheel (Lambda  
4 10B, Sutter Instruments). The focal plane was maintained constant on-line as  
5 described above.

6

## 7 **Pharmacological studies**

8 Pinacidil (100  $\mu$ M, Sigma-Aldrich); Diazoxide (300  $\mu$ M, Sigma-Aldrich) and  
9 Tolbutamide (500  $\mu$ M, Sigma-Aldrich), Mn(III)tetrakis(1-methyl-4-pyridyl)porphyrin  
10 (MnTMPyP, 25  $\mu$ M, Millipore),  $\alpha$ -cyano-4-hydroxycinnamate (4-CIN, 250  $\mu$ M, Sigma-  
11 Aldrich); iodoacetic acid (IAA, 200  $\mu$ M, Sigma-Aldrich) or KCN (1 mM, Sigma-Aldrich)  
12 was dissolved in aCSF from stock solutions of pinacidil (100 mM; NaOH 1M),  
13 diazoxide (300 mM; NaOH 1M), tolbutamide (500 mM; NaOH 1M), 4-CIN (250 mM;  
14 DMSO), IAA (200 mM, water) and KCN (1 M, water). Changes in extracellular  
15 glucose, lactate or pyruvate concentration were compensated by changes in sucrose  
16 concentration to maintain the osmolarity of the aCSF constant as previously  
17 described (Miki et al., 2001;Varin et al., 2015;Piquet et al., 2018) and pH was  
18 adjusted to 7.4.

19

## 20 **QUANTIFICATION AND STATISTICAL ANALYSIS**

### 21 **Analysis of somatic features**

22 The laminar location determined by infrared videomicroscopy and recorded as 1-4  
23 according to a location right within layers I, II/III or IV. For neurons located at the  
24 border of layers I-II/III and II/III-IV, the laminar location was represented by 1.5 and  
25 3.5, respectively. Somatic features were measured from IR DGC of the recorded  
26 neurons. Briefly, the soma was manually delineated using Image-Pro Analyzer 7.0  
27 software (MediaCybernetics) and length of major and minor axes, perimeter and area  
28 were extracted. The soma elongation was calculated as the ratio between major and

29 minor axis. Roundness was calculated according to:  $\frac{perimeter^2}{4\pi \times area}$ ; a value close to 1 is  
30 indicative of round somata.

31

## 1 **Analysis of electrophysiological properties**

2 32 electrophysiological properties chosen to describe the electrophysiological  
3 diversity of cortical neurons (Ascoli et al., 2008) were determined using the I-clamp  
4 fast mode of the amplifier as previously described (Karagiannis et al., 2009).  
5 Membrane potential values were corrected for theoretical liquid junction potential (-  
6 15.6 mV). Resting membrane potential was measured just after passing in whole-cell  
7 configuration, and only cells with a resting membrane potential more negative than -  
8 55 mV were analyzed further. Membrane resistance ( $R_m$ ) and membrane time  
9 constant ( $\tau_m$ ) were determined on responses to hyperpolarizing current pulses  
10 (duration, 800 ms) eliciting voltage shifts of 10-15 mV negative to rest (Kawaguchi,  
11 1993;Kawaguchi, 1995). Time constant was determined by fitting this voltage  
12 response to a single exponential. Membrane capacitance ( $C_m$ ) was calculated  
13 according to  $C_m = \tau_m / R_m$ . Sag index was quantified as a relative decrease in  
14 membrane conductance according to  $(G_{sag} - G_{hyp}) / G_{sag}$  (Halabisky et al., 2006) where  
15  $G_{hyp}$  and  $G_{sag}$  correspond to the whole-cell conductance when the sag was inactive  
16 and active, respectively.  $G_{sag}$  was measured as the slope of the linear portion of a  
17 current-voltage (I-V) plot, where V was determined at the end of 800 ms  
18 hyperpolarizing current pulses (-100 to 0 pA) and  $G_{hyp}$  as the slope of the linear  
19 portion of an I-V plot, where V was determined as the maximal negative potential  
20 during the 800 ms hyperpolarizing pulses. Rheobase was quantified as the minimal  
21 depolarizing current pulse intensity (800 ms duration pulses, 10 pA increments)  
22 generating at least one action potential. First spike latency (Gupta et al., 2000;Ascoli  
23 et al., 2008) was measured at rheobase as the time needed to elicit the first action  
24 potential. To describe different firing behaviors near threshold, spike frequency was  
25 measured near spike threshold on the first trace in which at least three spikes were  
26 triggered. Instantaneous discharge frequencies were measured and fitted to a  
27 straight line according to  $F_{threshold} = m_{threshold} \cdot t + F_{min.}$ , where  $m_{threshold}$  is the slope  
28 termed adaptation, t the time and  $F_{min.}$ , the minimal steady state frequency. Analysis  
29 of the action potentials waveforms was done on the first two spikes. Their amplitude  
30 (A1 and A2) was measured from threshold to the positive peak of the spike. Their  
31 duration (D1 and D2) was measured at half amplitude (Kawaguchi, 1993;Cauli et al.,  
32 1997). Their amplitude reduction and the duration increase were calculated  
33 according to  $(A1 - A2) / A1$  and  $(D2 - D1) / D1$ , respectively (Cauli et al., 1997;Cauli et al.,  
34 2000). The amplitude and the latency of the fast and medium afterhyperpolarization

1 (fAH and mAH) were measured for the first two action potentials as the difference  
2 between spike threshold and the negative peak of the AHs (Kawaguchi, 1993). The  
3 amplitude and latency of afterdepolarization (AD) following single spikes (Haj-  
4 Dahmane and Andrade, 1997) were measured as the difference between the  
5 negative peak of the fAH and the peak of the AD and between the spike threshold  
6 and the peak of the AD, respectively. When neurons did not exhibit mAH or AD,  
7 amplitude and latency were arbitrarily set to 0. A complex spike amplitude  
8 accommodation during a train of action potentials, consisting in a transient decrease  
9 of spikes amplitude, was measured as the difference between the peak of the  
10 smallest action potential and the peak of the following largest action potential (Cauli  
11 et al., 2000). Maximal firing rate was defined as the last trace before prominent  
12 reduction of action potentials amplitude indicative of a saturated discharge. To take  
13 into account the biphasic spike frequency adaptation (early and late) occurring at  
14 high firing rates (Cauli et al., 1997;Cauli et al., 2000;Gallopín et al., 2006),  
15 instantaneous firing frequency was fitted to a single exponential (Halabisky et al.,  
16 2006) with a sloping baseline, according to :  $F_{Saturation} = A_{sat} \cdot e^{-t/\tau_{sat}} + t \cdot m_{sat} + F_{max}$  , where  
17  $A_{sat}$  corresponds to the amplitude of early frequency adaptation,  $\tau_{sat}$  to the time  
18 constant of early adaptation,  $m_{sat}$  to the slope of late adaptation and  $F_{max}$  to the  
19 maximal steady state frequency.

20

## 21 **Unsupervised clustering**

22 To classify neurons unsupervised clustering was performed using the laminar  
23 location of the soma, 10 molecular parameters (vGluT1, GAD65 and/or GAD67,  
24 NOS-1, CB, PV, CR, NPY, VIP, SOM and CCK) and the 32 electrophysiological  
25 parameters described above. Neurons positive for GAD65 and/or GAD67 were  
26 denoted as GAD positive and these mRNAs were considered as a single molecular  
27 variable as previously described (Gallopín et al., 2006). Parameters were  
28 standardized by centering and reducing all of the values. Cluster analysis was run on  
29 Statistica 6.1 software (Statsoft) using Ward's method (Ward, 1963). The final  
30 number of clusters was established by hierarchically subdividing the clustering tree  
31 into higher order clusters as previously described (Karagiannis et al., 2009).

32

## 1 **Analysis of voltage clamp recordings**

2 Whole-cell currents were measured from a holding potential of -70 mV and  
3 membrane resistances were determined by applying a voltage step to -60 mV of 100  
4 ms every 5 s. The effects of  $K_{ATP}$  channel modulators were measured at the end of  
5 drug application by averaging, over a period of 1 minute, whole cell currents and  
6 changes in membrane resistance relative to control baseline prior to the application  
7 of drugs. Whole-cell  $K_{ATP}$  current and conductance were determined by subtracting  
8 current and conductance measured under  $K_{ATP}$  channel activator by their value  
9 measured under  $K_{ATP}$  channel blocker. The relative whole-cell  $K_{ATP}$  conductance was  
10 determined by dividing the whole-cell  $K_{ATP}$  conductance by the whole cell  
11 conductance measured under  $K_{ATP}$  channel activator. Whole-cell  $K_{ATP}$  current density  
12 was determined by dividing the whole-cell  $K_{ATP}$  current by the membrane  
13 capacitance.  $K_{ATP}$  current reversal potential was measured by subtracting I/V  
14 relationships obtained during voltage ramps from -60 to -130 mV determined under  
15  $K_{ATP}$  channel activator and blocker, respectively.

16 During ATP washout experiments, whole-cell currents and I/V relationships were  
17 measured every 10 s at a holding potential of -50 mV and during voltage ramps from  
18 -40 to -120 mV, respectively. Washout currents were determined by subtracting the  
19 whole-cell currents measured at the beginning and the end of the whole cell-  
20 recording, respectively.

## 21 22 **Analysis of current clamp recordings**

23 Every 10 s, membrane potential and mean firing rate were measured and membrane  
24 resistances were determined from voltage responses induced by -50 pA currents  
25 pulses lasting 1 s.  $K_{ATP}$  voltage response and changes in membrane resistance and  
26 firing rate were determined by subtracting their value measured under  $K_{ATP}$  channel  
27 activator by their value measured under  $K_{ATP}$  channel blocker. Neurons were  
28 considered as responsive to  $K_{ATP}$  channel modulators if the  $K_{ATP}$  channel activator  
29 induced both a hyperpolarization and a decrease in membrane resistance reversed  
30 by the  $K_{ATP}$  channel blocker.

## 31 32 **Analysis of perforated patch recordings**

33 Mean firing frequency was measured every 10 s. Quantification of spiking activity  
34 was determined by averaging firing frequency over a period of 5 min preceding a

1 change in extracellular aCSF composition. Firing frequencies were normalized by the  
2 averaged mean firing frequency measured under control condition.

3

#### 4 **NADH imaging**

5 Shading correction was applied off-line on the NADH autofluorescence images using  
6 the "Shading Corrector" plugin of FIJI software (Schindelin et al., 2012) and a blank  
7 field reference image. To compensate for potential x-y drifts all IR-DGC images were  
8 realigned off-line using the "StackReg" and "TurboReg" plugins (Thevenaz et al.,  
9 1998) of FIJI software and the same registration was applied to the corrected  
10 NAD(P)H autofluorescence images. To determine somatic regions of interest (ROIs)  
11 the soma was manually delineated on IR-DGC images. The mean NADH  
12 autofluorescence was measured at each time point using the same ROIs. Variations  
13 of fluorescence intensity were expressed as the ratio  $(F-F_0)/F_0$  where F corresponds  
14 to the mean fluorescence intensity in the ROI at a given time point, and F<sub>0</sub>  
15 corresponds to the mean fluorescence intensity in the same ROI during the 5 min  
16 control baseline prior to changes in aCSF composition. Effect of monocarboxylate  
17 superfusion or oxidative phosphorylation blockade was quantified by averaging the  
18 normalized ratio  $(R/R_0)$  during the last five minutes of drug application.

19

#### 20 **FRET imaging**

21 All images were realigned off-line as described above using the YFP images as the  
22 reference for registration. Fluorescence ratios were calculated by dividing the  
23 registered YFP images by the registered CFP images using FIJI. The somatic ROIs  
24 were manually delineated on the YFP images as described above. The mean ratio  
25 was measured at each time point using the same ROIs. Variations of fluorescence  
26 ratio were expressed as the ratio  $(R-R_0)/R_0$  where R corresponds to the  
27 fluorescence ratio in the ROI at a given time point, and R<sub>0</sub> corresponds to the mean  
28 fluorescence ratio in the same ROI during the 10 min control baseline prior to drug  
29 application. Effect of glycolysis or oxidative phosphorylation blockade was quantified  
30 by averaging the normalized ratio during the last five minutes of drug application.

31



## 1 **Statistical analysis**

2 Statistical analyses were performed with Statistica 6.1 and GraphPad Prism 7. All  
3 values are expressed as means  $\pm$  s.e.m. Normality of distributions and equality of  
4 variances were assessed using the Shapiro–Wilk test and the Fisher F-test,  
5 respectively. Parametric tests were only used if these criteria were met. Holm-  
6 Bonferroni correction was used for multiple comparisons and p-values are given as  
7 uncorrected. Statistical significance on all figures uses the following convention of  
8 corrected p-values: \*  $p < 0.05$ , \*\*  $p < 0.01$ , \*\*\*  $p < 0.001$ .

9 Statistical significance of morphological and electrophysiological properties of  
10 neurons was determined using the Mann-Whitney U test. Comparison of the  
11 occurrence of expressed genes and of responsiveness of  $K_{ATP}$  channel modulators  
12 between different cell types was determined using Fisher's exact test. Statistical  
13 significance of the effects of  $K_{ATP}$  channel modulators was determined using the  
14 Friedman and post hoc Dunn's tests. Significance of the effect of the ROS scavenger  
15 was determined using one-tailed unpaired student t-test. Comparison of  $K_{ATP}$  channel  
16 properties was determined using Mann-Whitney U, Student-t, or Kruskal-Wallis H  
17 tests. Comparison of responses between  $Kir6.2^{+/+}$  and  $Kir6.2^{-/-}$  neurons was  
18 determined using Mann-Whitney U test. Statistical significance of the effects of  
19 energy substrates and drug applications on evoked firing in perforated patch  
20 recordings was determined using Friedman and Dunn's tests. Comparison of the  
21 effects of monocarboxylates and cyanide on NADH fluorescence was determined  
22 using Mann-Whitney U test. Statistical significance of the effects of metabolic  
23 inhibitors on intracellular ATP was determined using Friedman and Dunn's tests.

1 **FIGURE LEGENDS**

2 **Figure 1. Cortical neuron subtypes express Kir6.2 and SUR1 K<sub>ATP</sub> channel**  
 3 **subunits.**

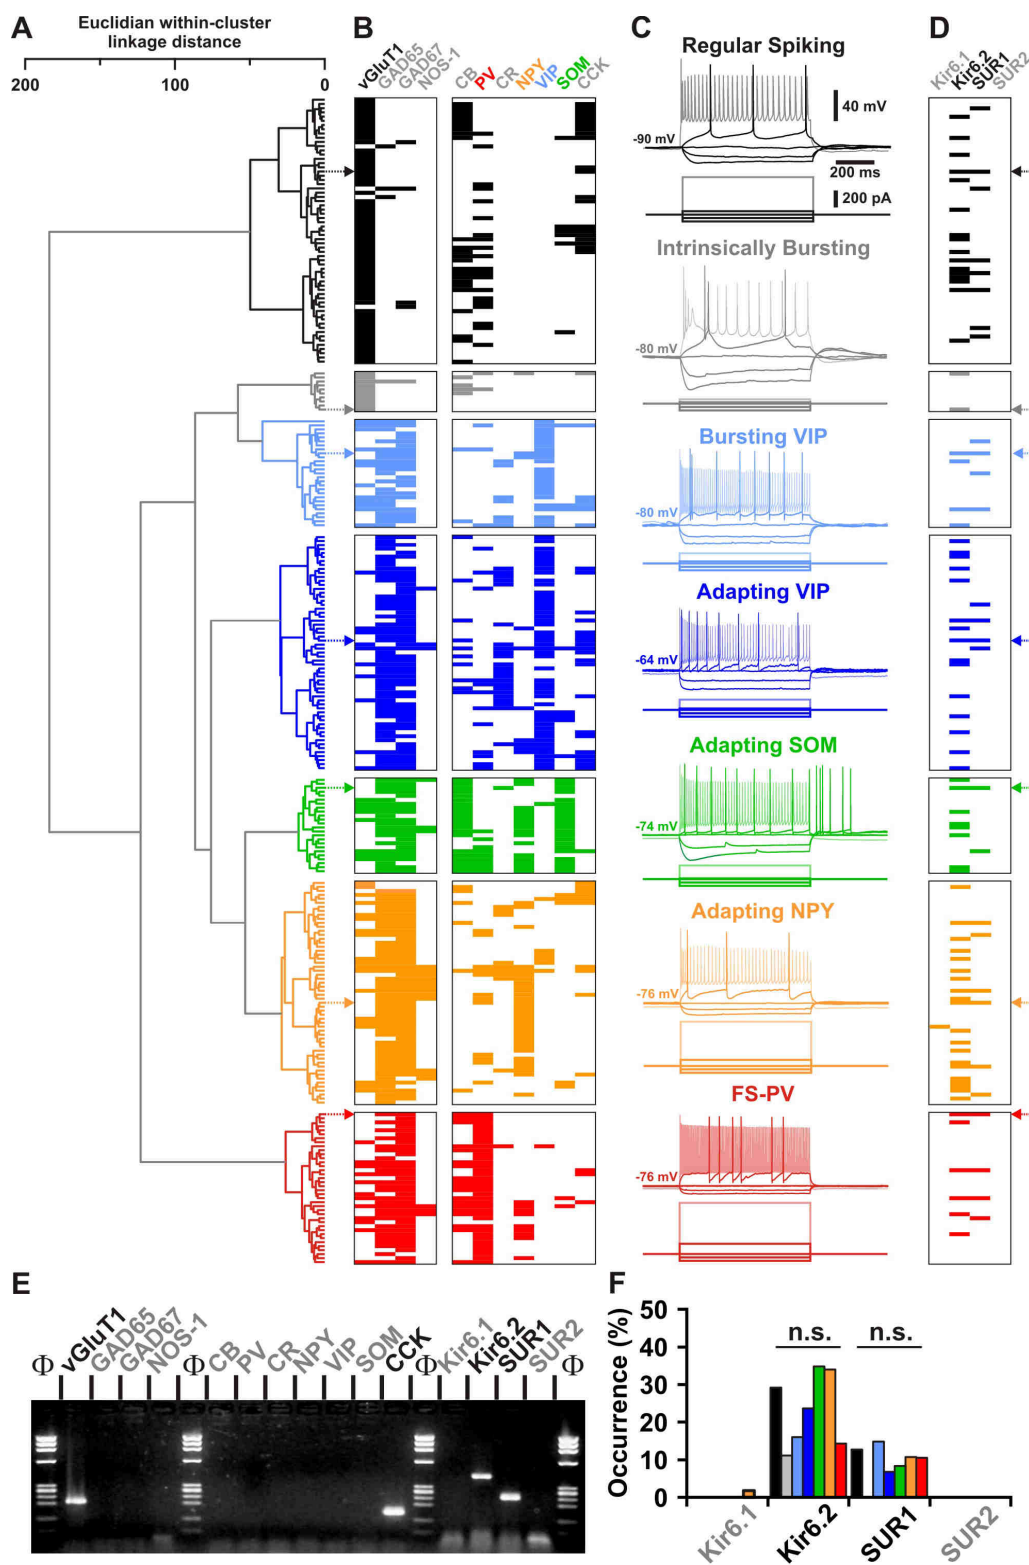

4

5

- 1 (A) Ward's clustering of 277 cortical neurons (left panel). The x axis represents the
- 2 average within-cluster linkage distance, and the y axis the individuals.
- 3 (B) Heatmap of gene expression across the different cell clusters. For each cell,
- 4 colored and white rectangles indicate presence and absence of genes, respectively.
- 5 (C) Representative voltage responses induced by injection of current pulses (bottom
- 6 traces) corresponding to -100, -50 and 0 pA, rheobase and intensity inducing a
- 7 saturating firing frequency (shaded traces) of a Regular Spiking neuron (black), an
- 8 Intrinsically Bursting neuron (gray), a Bursting VIP interneuron (light blue), an
- 9 Adapting VIP interneuron (blue), an Adapting SOM interneuron (green), an Adapting
- 10 NPY interneuron (orange), and a Fast Spiking-Parvalbumin interneuron (FS-PV, red).
- 11 The colored arrows indicate the expression profiles of neurons whose firing pattern is
- 12 illustrated in (C).
- 13 (D) Heatmap of the expression of the subunits of the  $K_{ATP}$  channels in the different
- 14 clusters.
- 15 (E) scRT-PCR analysis of the RS neuron depicted in (A-D).
- 16 (F) Histograms summarizing the expression profile of  $K_{ATP}$  channel subunits in
- 17 identified neuronal types. n.s. not statistically significant.
- 18

1 **Figure 2. Pharmacological and biophysical characterization of  $K_{ATP}$  channels in**  
 2 **cortical neurons.**

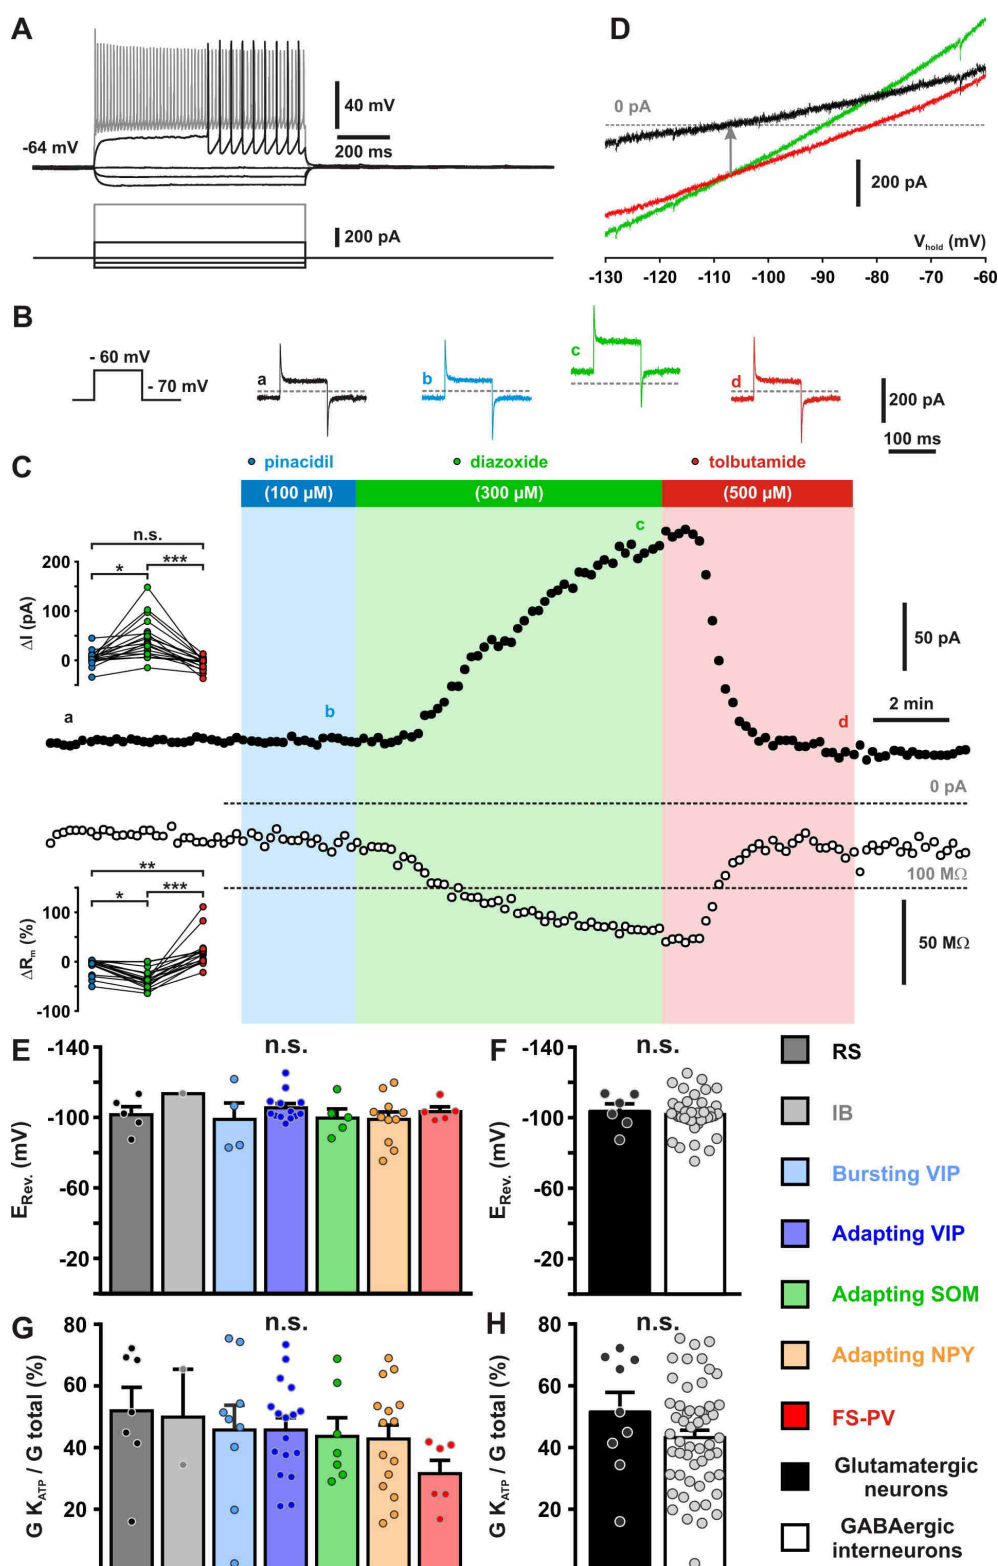

3  
 4  
 5

1 (A) Representative voltage responses of a FS-PV interneuron induced by injection of  
2 current pulses (bottom traces).  
3 (B) Protocol of voltage pulses from  $-70$  to  $-60$  mV (left trace). Responses of whole-  
4 cell currents in the FS-PV interneurons shown in (A) in control condition (black) and  
5 in presence of pinacidil (blue), piazoxide (green) and tolbutamide (red) at the time  
6 indicated by a-d in (C).  
7 (C) Stationary currents recorded at  $-60$  mV (filled circles) and membrane resistance  
8 (open circles) changes induced by  $K_{ATP}$  channel modulators. The colored bars and  
9 shaded zones indicate the duration of application of  $K_{ATP}$  channel modulators. Upper  
10 and lower insets: changes in whole-cell currents and relative changes in membrane  
11 resistance induced by  $K_{ATP}$  channel modulators, respectively.  
12 (D) Whole cell current-voltage relationships measured under diazoxide (green trace)  
13 and tolbutamide (red trace).  $K_{ATP}$  I/V curve (black trace) obtained by subtracting the  
14 curve under diazoxide by the curve under tolbutamide. The arrow indicates the  
15 reversal potential of  $K_{ATP}$  currents.  
16 (E-H) Histograms summarizing the  $K_{ATP}$  current reversal potential (E,F) and relative  
17  $K_{ATP}$  conductance (G,H) in identified neuronal subtypes (E,G) or between  
18 glutamatergic and GABAergic neurons (F,G). Data are expressed as mean  $\pm$  s.e.m.,  
19 and the individual data points are depicted. n.s. not statistically significant.

1 **Figure 3. Kir6.2 is the pore forming subunit of  $K_{ATP}$  channels in cortical**  
 2 **neurons.**

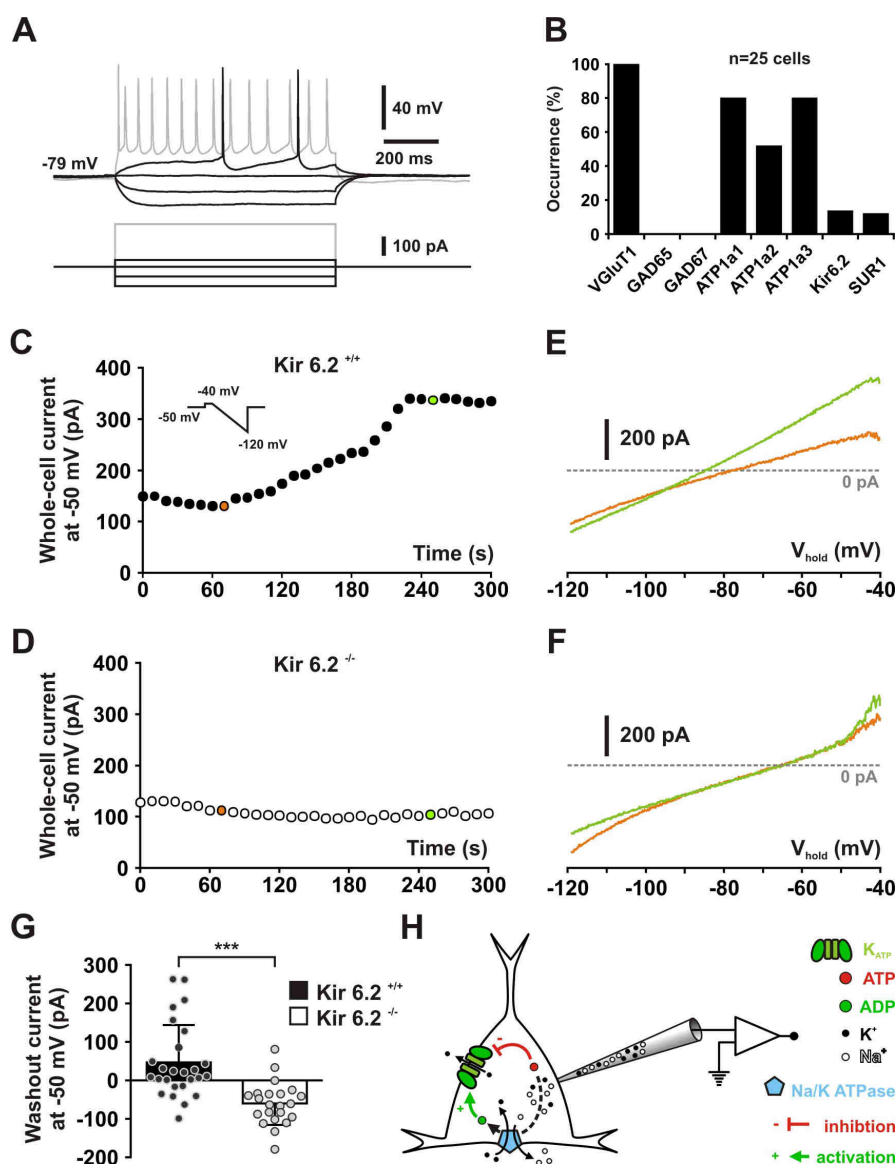

3  
 4  
 5 (A) Representative voltage responses of a mouse layer II/III RS pyramidal cell  
 6 induced by injection of current pulses (bottom traces).  
 7 (B) Histograms summarizing the expression profile of vGluT1, GAD65 and 67, the  
 8 ATP1a1-3 subunits of the Na/K ATPase and the Kir6.2 and SUR1  $K_{ATP}$  channel  
 9 subunits in layer II/III RS pyramidal cells from Kir6.2<sup>+/+</sup> mice.  
 10 (C, D) Whole-cell stationary currents recorded at -50 mV during dialysis with ATP-  
 11 free pipette solution in RS neurons of Kir6.2<sup>+/+</sup> (C) and Kir6.2<sup>-/-</sup> (D) mice. Inset;  
 12 voltage clamp protocol.

- 1 (E, F) Current-voltage relationships obtained during ATP washout at the time
- 2 indicated by green and orange circles in (C, D) in RS neurons of Kir6.2<sup>+/+</sup> (E) and
- 3 Kir6.2<sup>-/-</sup> (F) mice.
- 4 (G) Histograms summarizing the whole-cell ATP washout currents in Kir6.2<sup>+/+</sup> (black)
- 5 and Kir6.2<sup>-/-</sup> (white) RS neurons. Data are expressed as mean  $\pm$  s.e.m., and the
- 6 individual data points are depicted.
- 7 (H) Diagram depicting the principle of the ATP washout experiment.
- 8



1 **Figure 4. Modulation of cortical neuronal excitability and activity by  $K_{ATP}$**   
 2 **channels.**

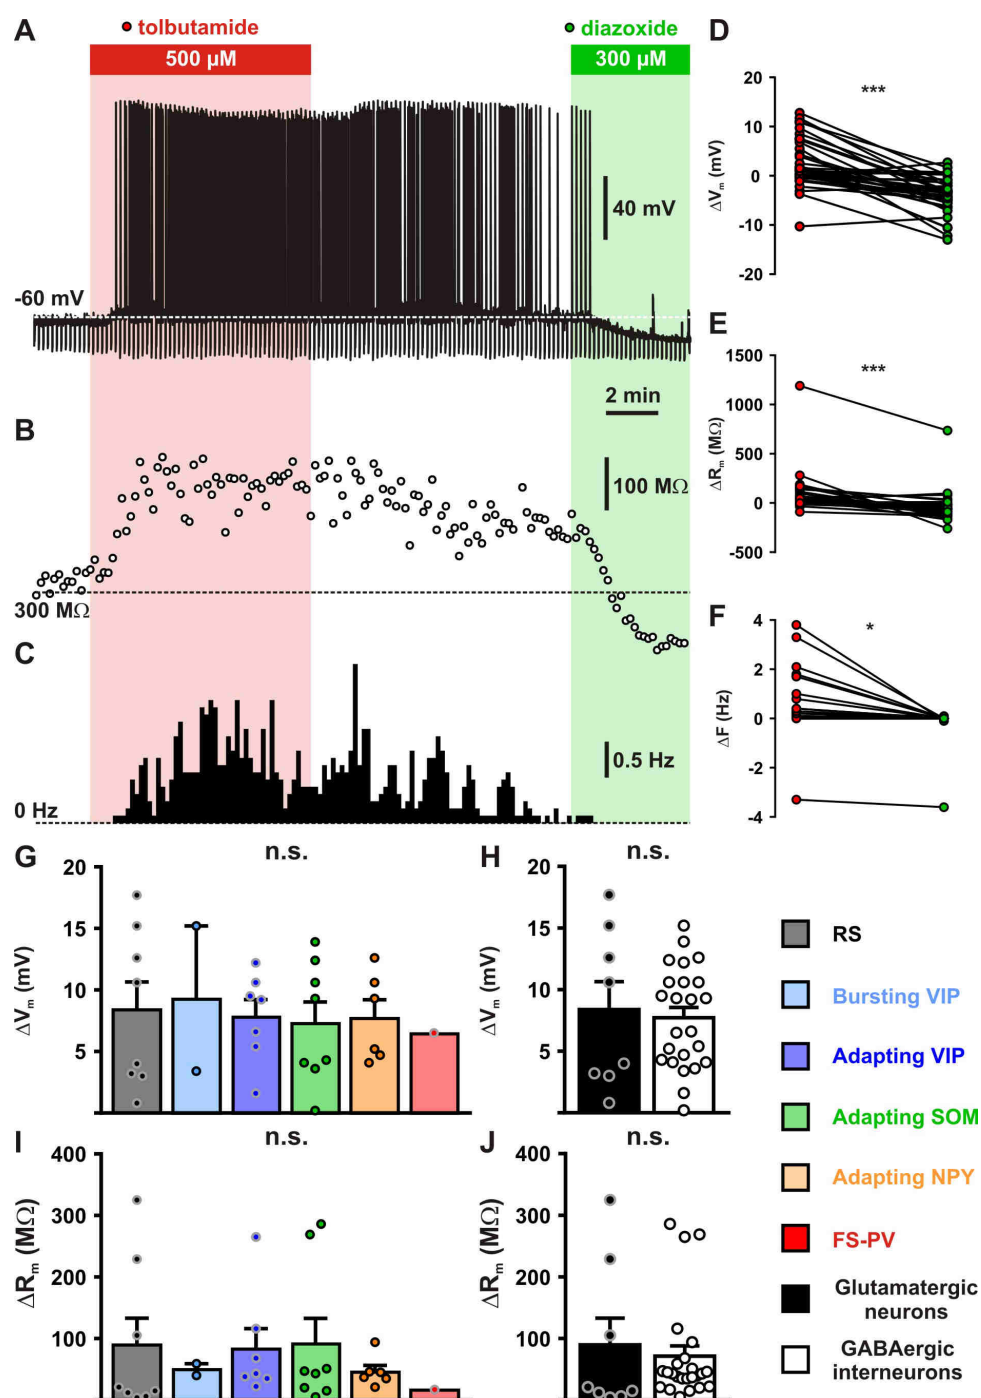

3  
 4  
 5 (A-C) Representative example showing the changes in membrane potential (A),  
 6 resistance (B, open circles) and spiking activity (C) induced by application of  
 7 tolbutamide (red) and diazoxide (green). The colored bars and shaded zones indicate  
 8 the application duration of  $K_{ATP}$  channel modulators.

1 (D-F) Relative changes in membrane potential (D), resistance (E) and firing rate (F)  
2 induced by tolbutamide and diazoxide in cortical neurons.  
3 (G-J) Histograms summarizing the modulation of membrane potential (G,  
4  $H_{(5,32)}=0.14854$ ,  $p=0.999$ , and H,  $U_{(8,24)}=95.5$ ,  $p=0.991$ ) and resistance (I,  
5  $H_{(5,32)}=3.00656$ ,  $p=0.699$ , and J,  $U_{(8,24)}=73$ ,  $p=0.329$ ) by  $K_{ATP}$  channels in neuronal  
6 subtypes (G, I) and groups (H, J). Data are expressed as mean  $\pm$  s.e.m., and the  
7 individual data points are depicted. n.s. not statistically significant.  
8

1 **Figure 5. Lactate enhances cortical neuronal activity via  $K_{ATP}$  channel**  
 2 **modulation.**

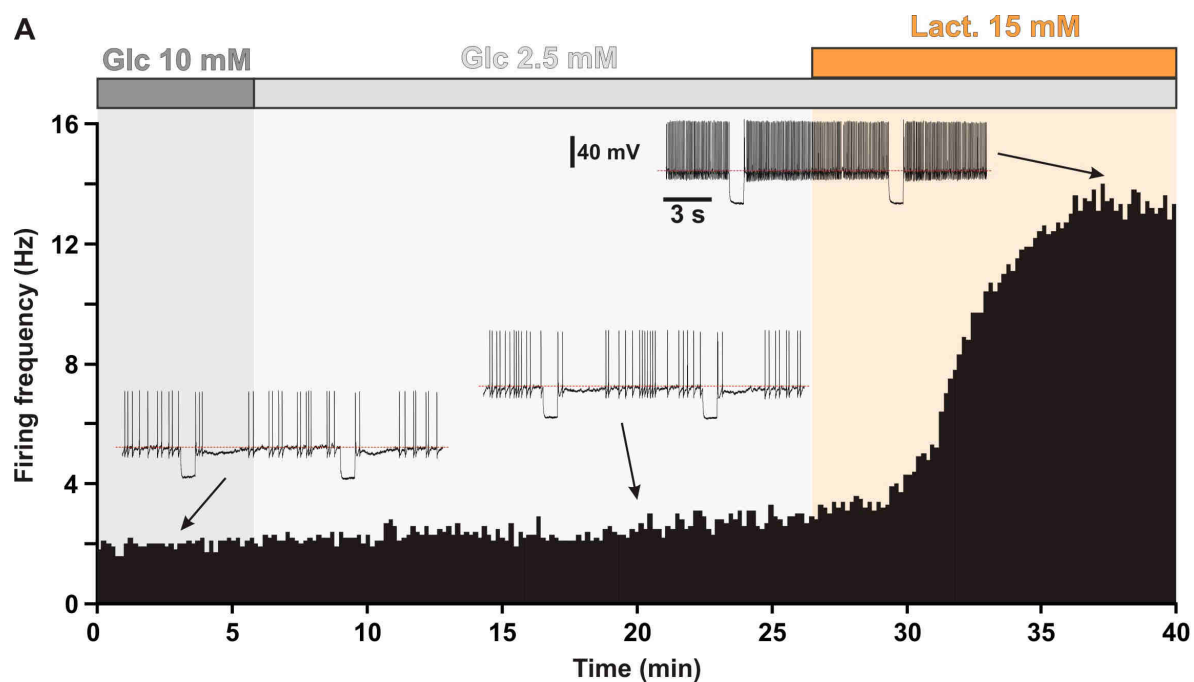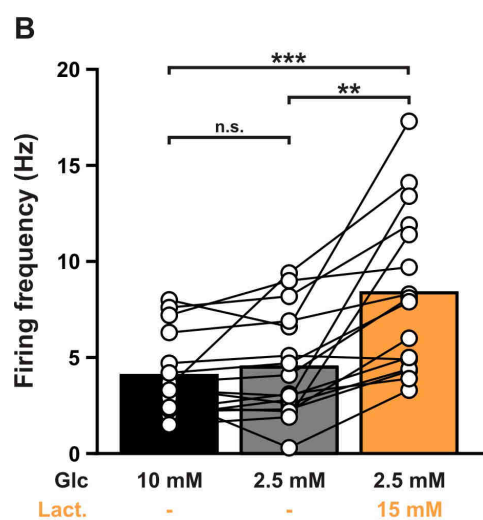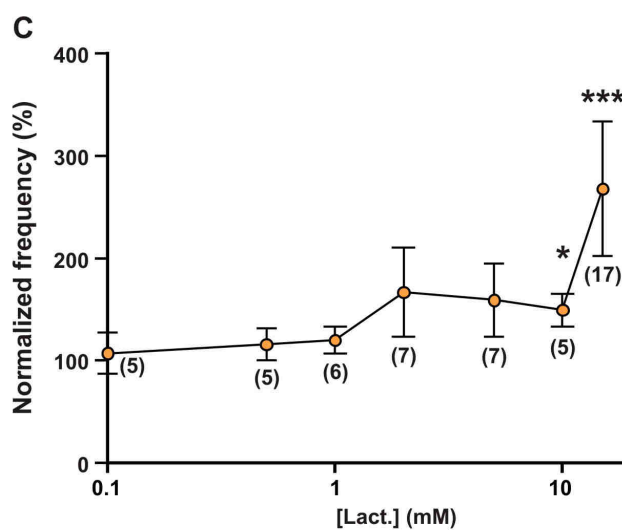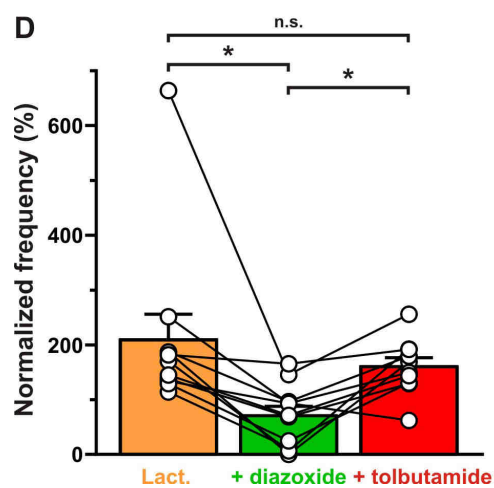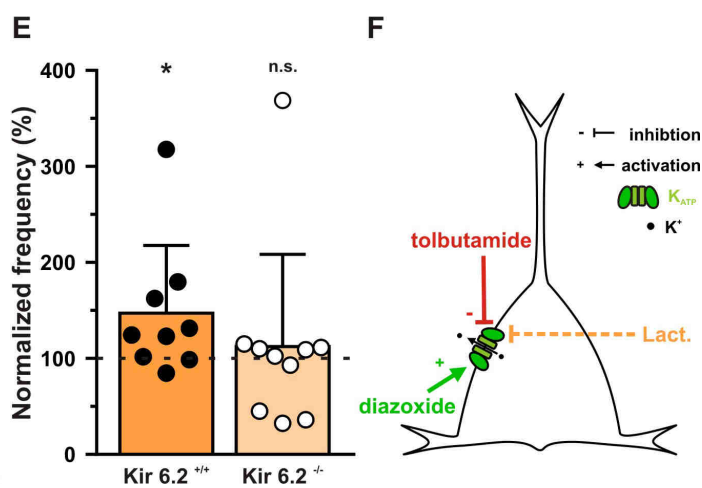

3  
4

- 1 (A) Representative perforated patch recording of an adapting VIP neuron showing  
2 the modulation of firing frequency induced by changes in the extracellular  
3 concentrations of metabolites. The colored bars and shaded zones indicate the  
4 concentration in glucose (grey) and lactate (orange). Voltage responses recorded at  
5 the time indicated by arrows. The red dashed lines indicate -40 mV.
- 6 (B) Histograms summarizing the mean firing frequency during changes in  
7 extracellular concentration of glucose (black and grey) and lactate (orange). Data are  
8 expressed as mean  $\pm$  s.e.m., and the individual data points are depicted. n.s. not  
9 statistically significant.
- 10 (C) Dose-dependent enhancement of firing frequency by lactate. Data are normalized  
11 by the mean firing frequency in absence of lactate and are expressed as mean  $\pm$   
12 s.e.m. Numbers in brackets indicate the number of recorded neurons at different  
13 lactate concentrations.
- 14 (D) Histograms summarizing the normalized frequency under 15 mM lactate (orange)  
15 and its modulation by addition of diazoxide (green) or tolbutamide (red). Data are  
16 expressed as mean  $\pm$  s.e.m., and the individual data points are depicted. n.s. not  
17 statistically significant.
- 18 (E) Histograms summarizing the enhancement of normalized frequency by 15 mM  
19 lactate in Kir6.2<sup>+/+</sup> (orange) and Kir6.2<sup>-/-</sup> (pale orange) mouse cortical neurons. The  
20 dash line indicates the normalized mean firing frequency in absence of lactate. Data  
21 are expressed as mean  $\pm$  s.e.m., and the individual data points are depicted.
- 22 (F) Diagram depicting the enhancement of neuronal activity by lactate via modulation  
23 of K<sub>ATP</sub> channels.

1 **Figure 6. Lactate enhancement of cortical neuronal activity involves lactate**  
 2 **uptake and metabolism.**

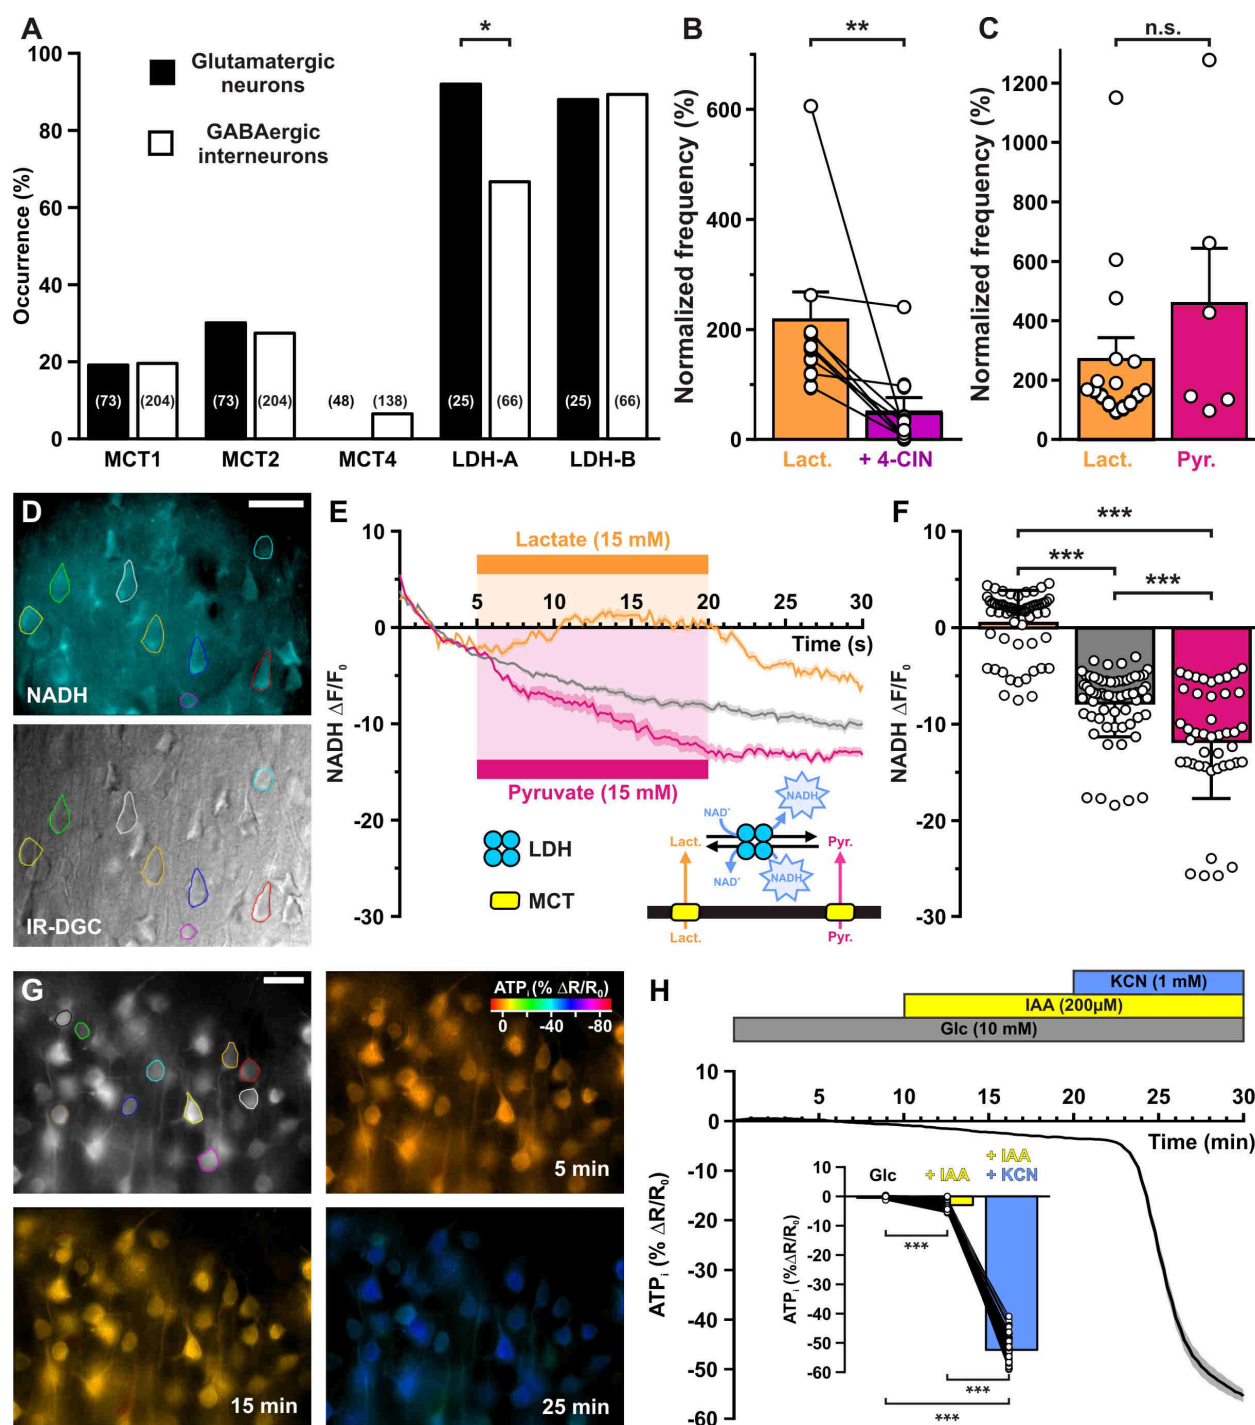

3  
 4  
 5 (A) Histograms summarizing the expression profile of the monocarboxylate  
 6 transporters MCT1, 2 and 4 and LDH A and B lactate dehydrogenase subunits in  
 7 glutamatergic neurons (black) and GABAergic interneurons (white). The numbers in  
 8 brackets indicate the number of analyzed cells.

1 (B) Histograms summarizing the enhancement of normalized frequency by 15 mM  
2 lactate (orange) and its suppression by the MCTs inhibitor 4-CIN (purple). Data are  
3 expressed as mean  $\pm$  s.e.m., and the individual data points are depicted.

4 (C) Histograms summarizing the enhancement of normalized frequency by 15 mM  
5 lactate (orange) and pyruvate (magenta). Data are expressed as mean  $\pm$  s.e.m., and  
6 the individual data points are depicted n.s. not statistically significant.

7 (D) Widefield NADH autofluorescence (upper panel, scale bar: 20  $\mu$ m) and  
8 corresponding field of view observed under IR-DGC (lower panel). The somatic  
9 regions of interest are delineated.

10 (E) Mean relative changes in NADH autofluorescence in control condition (grey) and  
11 in response to 15 mM lactate (orange) or pyruvate (magenta). The colored bars  
12 indicate the duration of applications. Data are expressed as mean  $\pm$  s.e.m. Inset:  
13 diagram depicting the NADH changes induced by lactate and pyruvate uptake by  
14 MCT and their interconversion by LDH.

15 (F) Histograms summarizing the mean relative changes in NAD(P)H  
16 autofluorescence measured during the last 5 minutes of 15 mM lactate (orange) or  
17 pyruvate (magenta) application and corresponding time in control condition (grey).  
18 Data are expressed as mean  $\pm$  s.e.m., and the individual data points are depicted.

19 (G) Widefield YFP fluorescence of the ATP biosensor AT1.03<sup>YEMK</sup> (upper left panel,  
20 scale bar: 30  $\mu$ m) and pseudocolor images showing the intracellular ATP (YFP/CFP  
21 ratio value coded by pixel hue, see scale bar in upper right panel) and the  
22 fluorescence intensity (coded by pixel intensity) at different times under 10 mM  
23 extracellular glucose (upper right panel) and after addition of IAA (lower left panel)  
24 and KCN (lower right panel).

25 (H) Mean relative changes in intracellular ATP (relative YFP/CFP ratio) measured  
26 under 10 mM extracellular glucose (grey) and after addition of IAA (yellow) and KCN  
27 (blue). Data are expressed as mean  $\pm$  s.e.m. The colored bars indicate the time and  
28 duration of metabolic inhibitor application. Inset: Histograms summarizing the mean  
29 relative changes in intracellular ATP (relative YFP/CFP ratio) ratio under 10 mM  
30 extracellular glucose (grey) and after addition of IAA (yellow) and KCN (blue). Data  
31 are expressed as mean  $\pm$  s.e.m., and the individual data points are depicted.



1 **Figure 7. Diagram summarizing the mechanism of lactate-sensing in the**  
 2 **cortical network.**

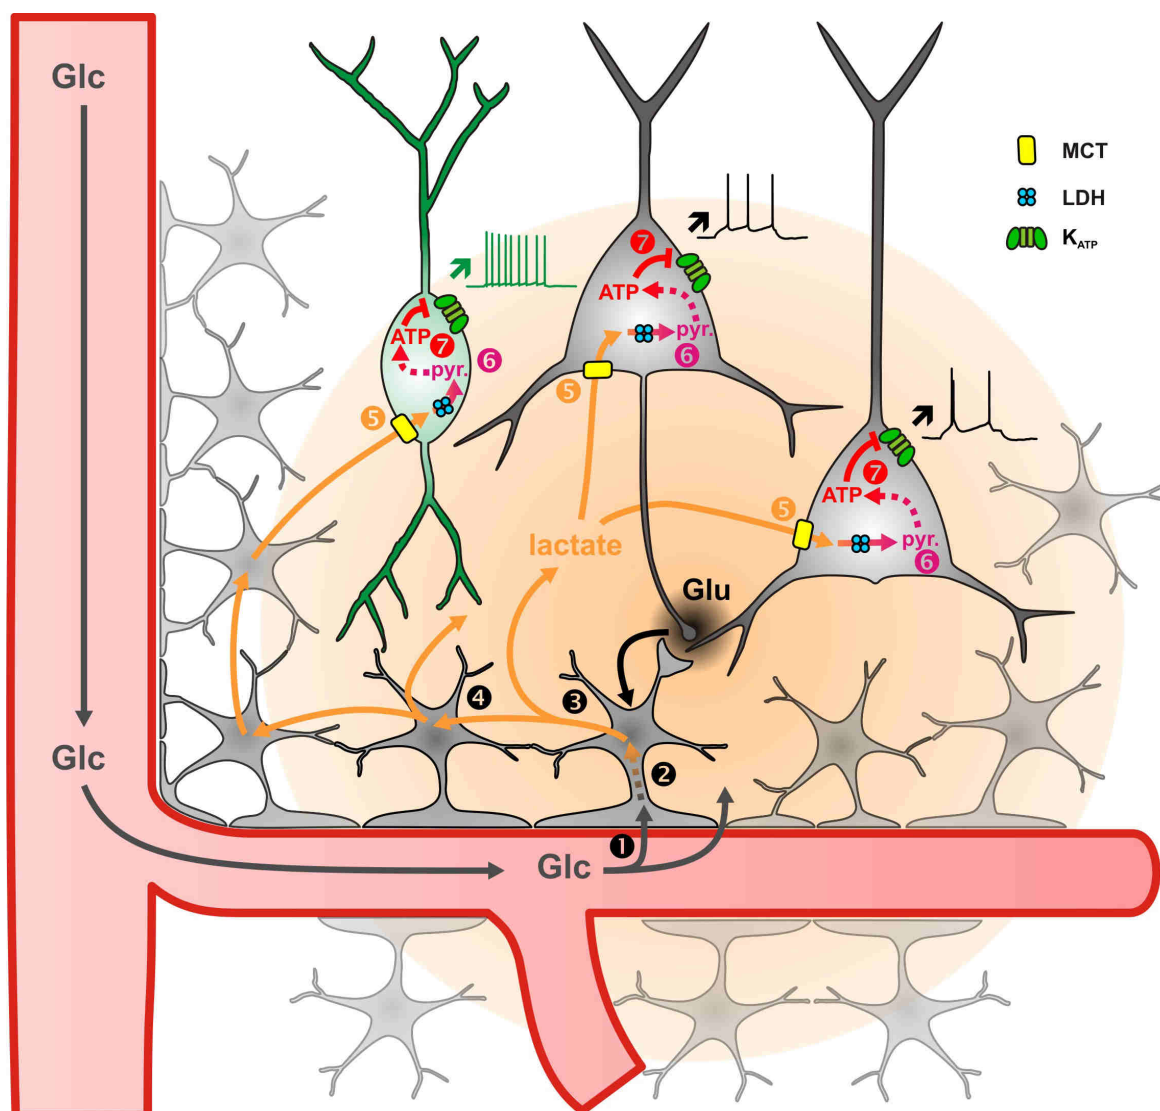

3  
 4 Glutamate (Glu) released during synaptic transmission stimulates **①** blood glucose  
 5 (Glc) uptake in astrocytes, **②** aerobic glycolysis, **③** lactate release and **④** diffusion  
 6 through the astrocytic network. Lactate is then **⑤** taken up by neurons via  
 7 monobarboxylate transporters (MCT) and **⑥** oxidized into pyruvate by lactate  
 8 dehydrogenase (LDH). The ATP produced by pyruvate oxidative metabolism **⑦**  
 9 closes  $K_{ATP}$  channels and increases the spiking activity of both pyramidal cells (black)  
 10 and inhibitory interneurons (green). The color gradient of the circles represents the  
 11 extent of glutamate (black) and lactate (orange) diffusion, respectively. Dashed  
 12 arrows indicate multisteps reactions.

13



1 **Figure S1. Molecular expression of K<sub>ATP</sub> channels.**

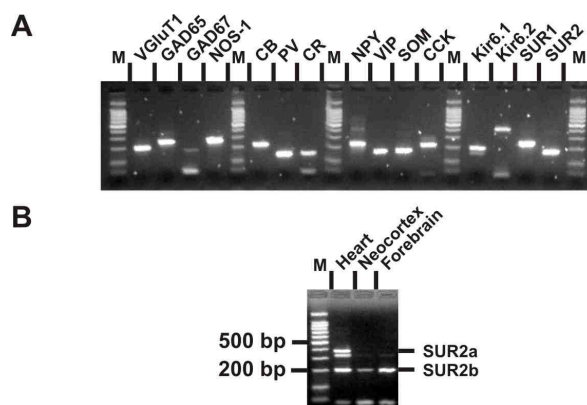

2  
3  
4 (A) RT-PCR products generated from 500 pg of total cortical RNAs. M: 100 bp ladder  
5 molecular weight marker.

6 (B) SUR2 splice variants-specific RT-PCR analysis of 1 ng total RNAs from rat heart,  
7 neocortex and forebrain.

8

## 1 Figure S2. Diazoxide-induced current is independent of ROS production.

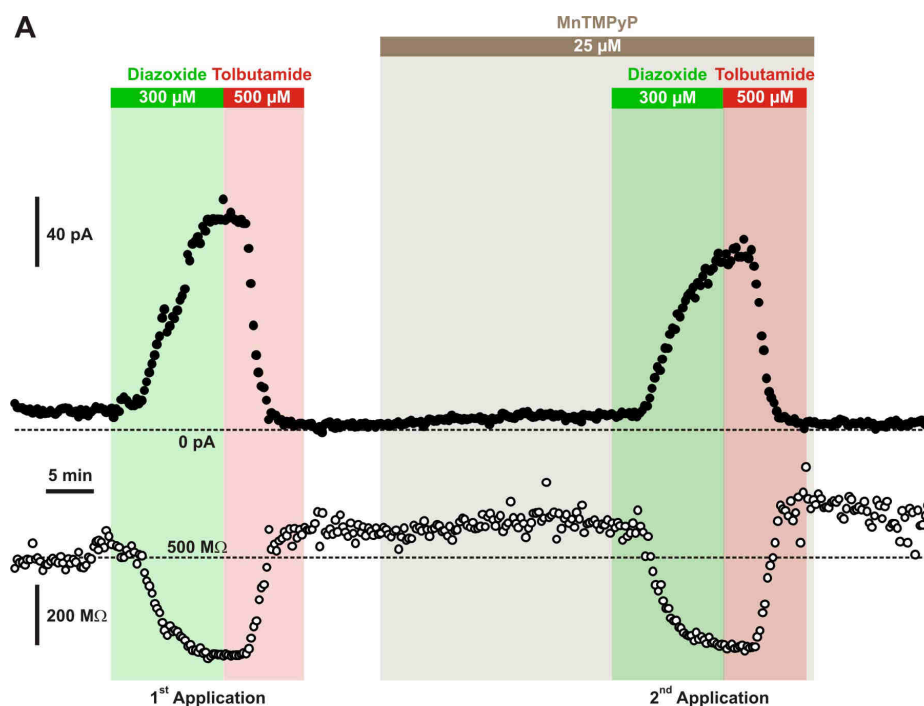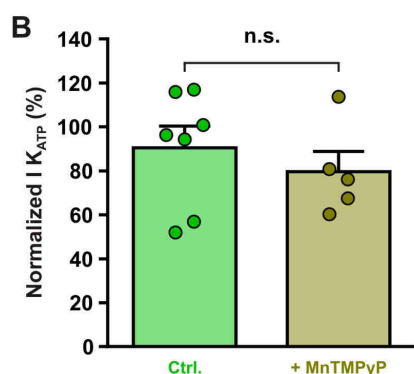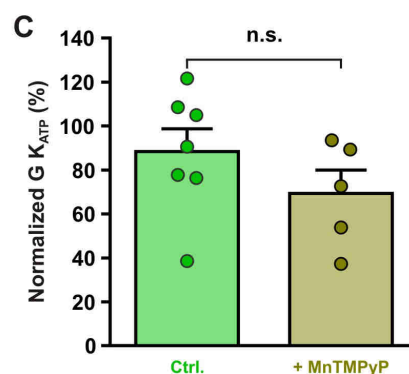

2  
3 (A) Representative stationary currents at -60 mV (filled circles) and membrane  
4 resistance (open circles) changes induced by diazoxide and tolbutamide under  
5 control condition and in presence of the superoxide dismutase and catalase mimetic,  
6 MnTMPyP. The colored bars and shaded zones indicate the duration of application.  
7 (B-C) Histograms summarizing the relative  $K_{ATP}$  currents (B) and relative whole-cell  
8  $K_{ATP}$  conductance (C) evoked by two consecutive diazoxide and tolbutamide  
9 applications in control condition (Ctrl.) and after the presence of MnTMPyP. Data are  
10 normalized by the data measured during first application, expressed as mean  $\pm$   
11 s.e.m., and the individual data points are depicted. n.s. not statistically significant.  
12

1 **Figure S3. Characterization of  $K_{ATP}$  channels in different cortical neurons.**

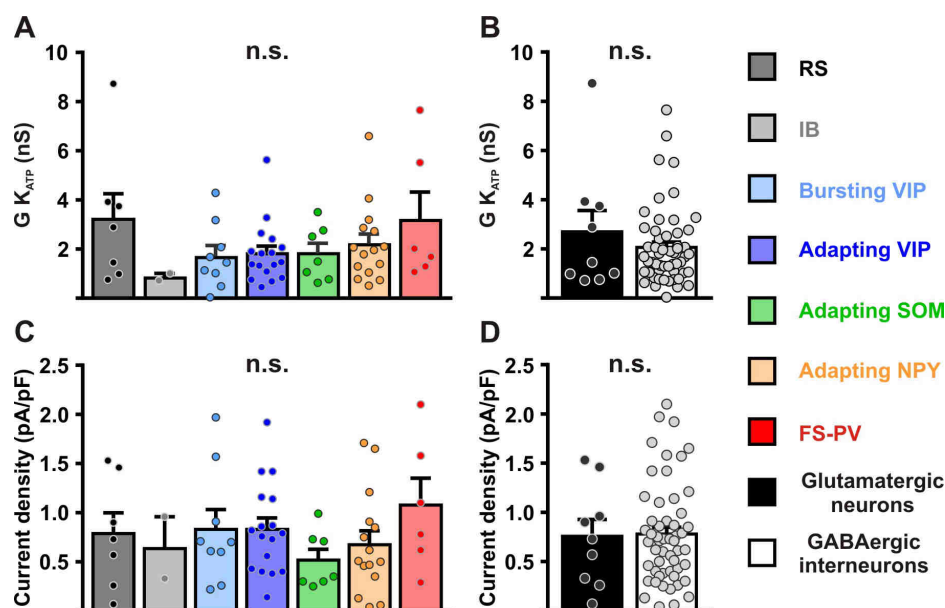

2  
3 (A-D) Histograms summarizing the whole-cell  $K_{ATP}$  conductance (A, B) and  $K_{ATP}$   
4 current density (C, D) and  $K_{ATP}$  current reversal potential in identified neuronal  
5 subtypes (A,C) or between glutamatergic and GABAergic neurons (B,D). Data are  
6 expressed as mean  $\pm$  s.e.m., and the individual data points are depicted. n.s. not  
7 statistically significant.

1 **Figure S4. Modulation of neuronal activity in different cortical neurons by  $K_{ATP}$**   
 2 **channels.**

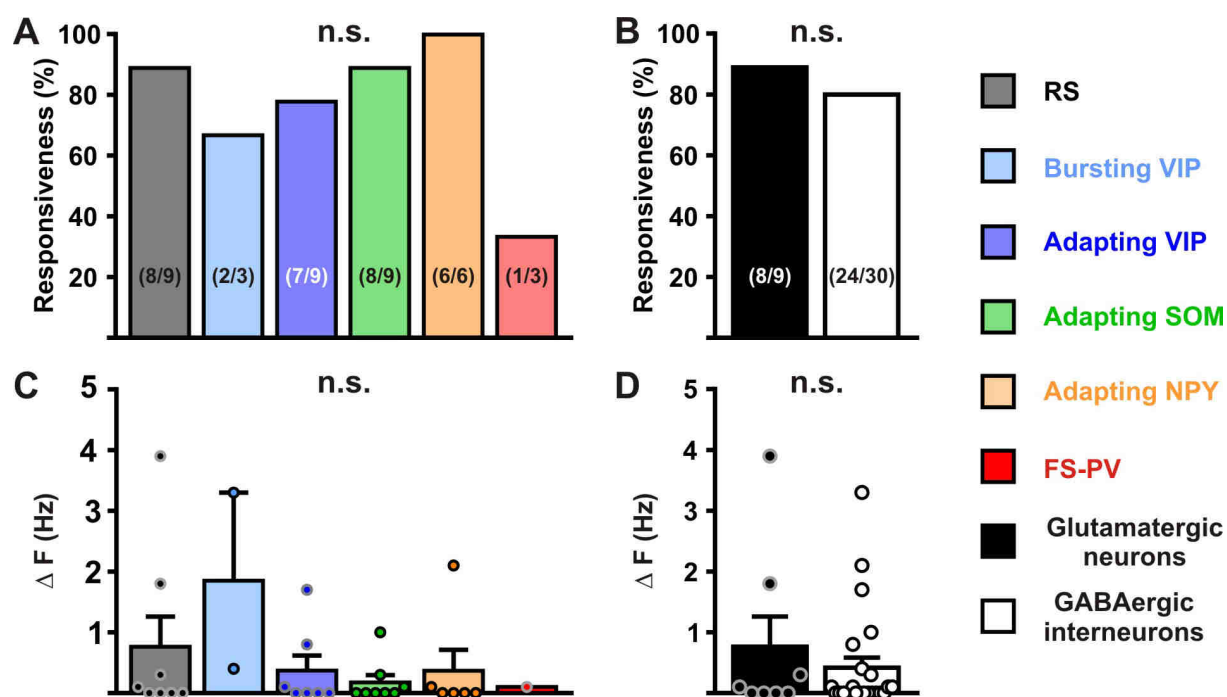

3  
 4  
 5 (A-D) Histograms summarizing the proportion of responsive neurons (A,  
 6  $K^2_{(5)}=7.3125$ ,  $p=0.1984$ , and B,  $p=0.9999$ ) and modulation firing rate (C,  
 7  $H_{(5,32)}=5.69107$ ,  $p=0.337$ , and D,  $U_{(8,24)}=87.5$ ,  $p=0.6994$ ) by  $K_{ATP}$  channels in  
 8 neuronal subtypes (A,C) and groups (B,D). The numbers in brackets indicate the  
 9 number of responsive cells and analyzed cells, respectively. Data are expressed as  
 10 mean  $\pm$  s.e.m., and the individual data points are depicted. n.s. not statistically  
 11 significant.

1 **Figure S5. Expression profile of monocarboxylate transporters and lactate**  
 2 **dehydrogenase subunits in different cortical neuronal types.**

3

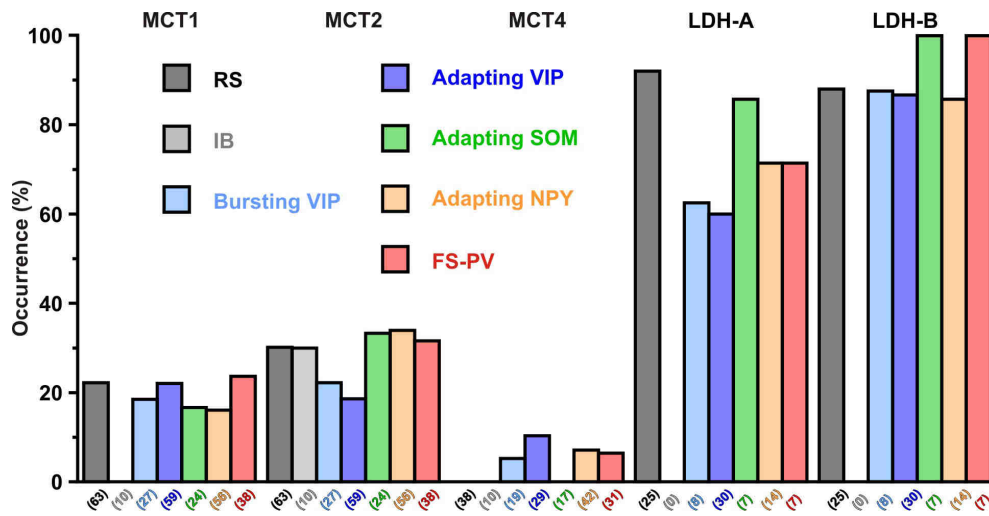

4

5

6 Histograms summarizing the expression profile of the monocarboxylate transporters  
 7 MCT1, 2 and 4 and LDH A and B lactate dehydrogenase subunits in different  
 8 neuronal subtypes. The numbers in brackets indicate the number of analyzed cells.

9

1 **Figure S6. Neuronal NADH autofluorescence increase by blockade of oxidative**  
2 **phosphorylation.**

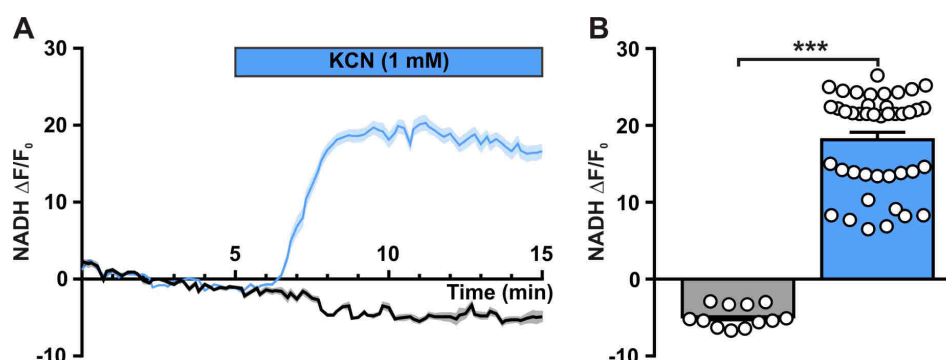

- 3  
4  
5 (A) Mean relative changes in NADH autofluorescence in control condition (grey) and  
6 in response to 1 mM KCN (blue). The colored bar indicates the duration of KCN  
7 applications. Data are expressed as mean  $\pm$  s.e.m.  
8 (B) Histograms summarizing the mean relative changes in NADH autofluorescence  
9 measured during the last 5 minutes of 1 mM KCN application (blue) and  
10 corresponding time in control condition (grey). Data are expressed as mean  $\pm$  s.e.m.,  
11 and the individual data points are depicted.

## 1 REFERENCES

- 2  
3  
4 Aguilar-Bryan,L., Nichols,C.G., Wechsler,S.W., Clement,J.P., Boyd,A.E., III,  
5 Gonzalez,G., Herrera-Sosa,H., Nguy,K., Bryan,J., and Nelson,D.A. (1995). Cloning  
6 of the beta cell high-affinity sulfonylurea receptor: a regulator of insulin secretion.  
7 *Science* 268, 423-426.
- 8 Ahmed,K., Tunaru,S., Tang,C., Muller,M., Gille,A., Sassmann,A., Hanson,J., and  
9 Offermanns,S. (2010). An autocrine lactate loop mediates insulin-dependent  
10 inhibition of lipolysis through GPR81. *Cell Metab* 11, 311-319.
- 11 Ainscow,E.K., Mirshamsi,S., Tang,T., Ashford,M.L., and Rutter,G.A. (2002). Dynamic  
12 imaging of free cytosolic ATP concentration during fuel sensing by rat hypothalamic  
13 neurones: evidence for ATP-independent control of ATP-sensitive K(+) channels. *J.*  
14 *Physiol* 544, 429-445.
- 15 Almeida,A., Almeida,J., Bolanos,J.P., and Moncada,S. (2001). Different responses of  
16 astrocytes and neurons to nitric oxide: the role of glycolytically generated ATP in  
17 astrocyte protection. *Proc. Natl. Acad. Sci. U. S. A* 98, 15294-15299.
- 18 Ammala,C., Moorhouse,A., and Ashcroft,F.M. (1996). The sulphonylurea receptor  
19 confers diazoxide sensitivity on the inwardly rectifying K+ channel Kir6.1 expressed  
20 in human embryonic kidney cells. *J. Physiol* 494 ( Pt 3), 709-714.
- 21 Ascoli,G.A., Alonso-Nanclares,L., Anderson,S.A., Barrionuevo,G., Avides-  
22 Piccione,R., Burkhalter,A., Buzsaki,G., Cauli,B., DeFelipe,J., Fairen,A.,  
23 Feldmeyer,D., Fishell,G., Fregnac,Y., Freund,T.F., Gardner,D., Gardner,E.P.,  
24 Goldberg,J.H., Helmstaedter,M., Hestrin,S., Karube,F., Kisvarday,Z.F., Lambolez,B.,  
25 Lewis,D.A., Marin,O., Markram,H., Munoz,A., Packer,A., Petersen,C.C.,  
26 Rockland,K.S., Rossier,J., Rudy,B., Somogyi,P., Staiger,J.F., Tamas,G.,  
27 Thomson,A.M., Toledo-Rodriguez,M., Wang,Y., West,D.C., and Yuste,R. (2008).  
28 Petilla terminology: nomenclature of features of GABAergic interneurons of the  
29 cerebral cortex. *Nat. Rev. Neurosci.* 9, 557-568.
- 30 Ashford,M.L., Sturgess,N.C., Trout,N.J., Gardner,N.J., and Hales,C.N. (1988).  
31 Adenosine-5'-triphosphate-sensitive ion channels in neonatal rat cultured central  
32 neurones. *Pflugers Arch.* 412, 297-304.
- 33 Attwell,D., and Laughlin,S.B. (2001). An energy budget for signaling in the grey  
34 matter of the brain. *J. Cereb. Blood Flow Metab* 21, 1133-1145.
- 35 Aziz,Q., Li,Y., Anderson,N., Ojake,L., Tsisanova,E., and Tinker,A. (2017). Molecular  
36 and functional characterization of the endothelial ATP-sensitive potassium channel.  
37 *J. Biol. Chem.* 292, 17587-17597.
- 38 Babenko,A.P., Aguilar-Bryan,L., and Bryan,J. (1998). A view of sur/KIR6.X, KATP  
39 channels. *Annu. Rev. Physiol* 60, 667-687.



- 1 Bittar,P.G., Charnay,Y., Pellerin,L., Bouras,C., and Magistretti,P.J. (1996). Selective  
2 distribution of lactate dehydrogenase isoenzymes in neurons and astrocytes of  
3 human brain. *J. Cereb. Blood Flow Metab* *16*, 1079-1089.
- 4 Bondjers,C., He,L., Takemoto,M., Norlin,J., Asker,N., Hellstrom,M., Lindahl,P., and  
5 Betsholtz,C. (2006). Microarray analysis of blood microvessels from PDGF-B and  
6 PDGF-Rbeta mutant mice identifies novel markers for brain pericytes. *FASEB J.* *20*,  
7 1703-1705.
- 8 Bouzier-Sore,A.K., Voisin,P., Bouchaud,V., Bezancon,E., Franconi,J.M., and  
9 Pellerin,L. (2006). Competition between glucose and lactate as oxidative energy  
10 substrates in both neurons and astrocytes: a comparative NMR study. *Eur. J.*  
11 *Neurosci.* *24*, 1687-1694.
- 12 Bouzier-Sore,A.K., Voisin,P., Canioni,P., Magistretti,P.J., and Pellerin,L. (2003).  
13 Lactate is a preferential oxidative energy substrate over glucose for neurons in  
14 culture. *J. Cereb. Blood Flow Metab* *23*, 1298-1306.
- 15 Bozzo,L., Puyal,J., and Chatton,J.Y. (2013). Lactate modulates the activity of primary  
16 cortical neurons through a receptor-mediated pathway. *PLoS. ONE.* *8*, e71721.
- 17 Broer,S., Broer,A., Schneider,H.P., Stegen,C., Halestrap,A.P., and Deitmer,J.W.  
18 (1999). Characterization of the high-affinity monocarboxylate transporter MCT2 in  
19 *Xenopus laevis* oocytes. *Biochem. J.* *341 ( Pt 3)*, 529-535.
- 20 Broer,S., Schneider,H.P., Broer,A., Rahman,B., Hamprecht,B., and Deitmer,J.W.  
21 (1998). Characterization of the monocarboxylate transporter 1 expressed in *Xenopus*  
22 *laevis* oocytes by changes in cytosolic pH. *Biochem. J.* *333 ( Pt 1)*, 167-174.
- 23 Cabezas,C., Irinopoulou,T., Cauli,B., and Poncer,J.C. (2013). Molecular and  
24 functional characterization of GAD67-expressing, newborn granule cells in mouse  
25 dentate gyrus. *Front Neural Circuits.* *7*, 60.
- 26 Cahoy,J.D., Emery,B., Kaushal,A., Foo,L.C., Zamanian,J.L., Christopherson,K.S.,  
27 Xing,Y., Lubischer,J.L., Krieg,P.A., Krupenko,S.A., Thompson,W.J., and Barres,B.A.  
28 (2008). A transcriptome database for astrocytes, neurons, and oligodendrocytes: a  
29 new resource for understanding brain development and function. *J. Neurosci.* *28*,  
30 264-278.
- 31 Cao,R., Higashikubo,B.T., Cardin,J., Knoblich,U., Ramos,R., Nelson,M.T.,  
32 Moore,C.I., and Brumberg,J.C. (2009). Pinacidil induces vascular dilation and  
33 hyperemia in vivo and does not impact biophysical properties of neurons and  
34 astrocytes in vitro. *Cleve. Clin. J. Med.* *76 Suppl 2*, S80-S85.
- 35 Cauli,B., Audinat,E., Lambolez,B., Angulo,M.C., Ropert,N., Tsuzuki,K., Hestrin,S.,  
36 and Rossier,J. (1997). Molecular and physiological diversity of cortical nonpyramidal  
37 cells. *J. Neurosci.* *17*, 3894-3906.
- 38 Cauli,B., Porter,J.T., Tsuzuki,K., Lambolez,B., Rossier,J., Quenet,B., and Audinat,E.  
39 (2000). Classification of fusiform neocortical interneurons based on unsupervised  
40 clustering. *Proc. Natl. Acad. Sci. U. S. A* *97*, 6144-6149.

- 1 Cauli,B., Tong,X.K., Rancillac,A., Serluca,N., Lambolez,B., Rossier,J., and Hamel,E.  
2 (2004). Cortical GABA interneurons in neurovascular coupling: relays for subcortical  
3 vasoactive pathways. *J. Neurosci.* *24*, 8940-8949.
- 4 Cea-del Rio,C.A., Lawrence,J.J., Tricoire,L., Erdelyi,F., Szabo,G., and McBain,C.J.  
5 (2010). M3 muscarinic acetylcholine receptor expression confers differential  
6 cholinergic modulation to neurochemically distinct hippocampal basket cell subtypes.  
7 *J. Neurosci.* *30*, 6011-6024.
- 8 Chance,B., Cohen,P., Jobsis,F., and Schoener,B. (1962). Intracellular oxidation-  
9 reduction states in vivo. *Science* *137*, 499-509.
- 10 Choi,H.B., Gordon,G.R., Zhou,N., Tai,C., Rungta,R.L., Martinez,J., Milner,T.A.,  
11 Ryu,J.K., McLarnon,J.G., Tresguerres,M., Levin,L.R., Buck,J., and MacVicar,B.A.  
12 (2012). Metabolic Communication between Astrocytes and Neurons via Bicarbonate-  
13 Responsive Soluble Adenylyl Cyclase. *Neuron* *75*, 1094-1104.
- 14 Chuquet,J., Quilichini,P., Nimchinsky,E.A., and Buzsaki,G. (2010). Predominant  
15 Enhancement of Glucose Uptake in Astrocytes versus Neurons during Activation of  
16 the Somatosensory Cortex. *J. Neurosci.* *30*, 15298-15303.
- 17 Chutkow,W.A., Simon,M.C., Le Beau,M.M., and Burant,C.F. (1996). Cloning, tissue  
18 expression, and chromosomal localization of SUR2, the putative drug-binding subunit  
19 of cardiac, skeletal muscle, and vascular KATP channels. *Diabetes* *45*, 1439-1445.
- 20 Clarke,D.D., and Sokoloff,L. (1999). Circulation and Energy Metabolism of the Brain.  
21 In *Basic Neurochemistry: Molecular, Cellular and Medical Aspects.*, G.J. Siegel, ed.  
22 (Philadelphia: Lippincott Williams & Wilkins), pp. 637-669.
- 23 Cunningham,M.O., Pervouchine,D.D., Racca,C., Kopell,N.J., Davies,C.H.,  
24 Jones,R.S., Traub,R.D., and Whittington,M.A. (2006). Neuronal metabolism governs  
25 cortical network response state. *Proc. Natl. Acad. Sci. U. S. A* *103*, 5597-5601.
- 26 D'Agostino,D.P., Putnam,R.W., and Dean,J.B. (2007). Superoxide ( $\cdot\text{O}_2$ -)  
27 production in CA1 neurons of rat hippocampal slices exposed to graded levels of  
28 oxygen. *J. Neurophysiol.*
- 29 de Castro Abrantes H., Briquet,M., Schmuziger,C., Restivo,L., Puyal,J.,  
30 Rosenberg,N., Rocher,A.B., Offermanns,S., and Chatton,J.Y. (2019). The lactate  
31 receptor HCAR1 modulates neuronal network activity through the activation of  
32 Galpha and Gbeta subunits. *J. Neurosci.*
- 33 Devienne,G., Le Gac,B., Piquet,J., and Cauli,B. (2018). Single Cell Multiplex Reverse  
34 Transcription Polymerase Chain Reaction After Patch-clamp. *J. Vis. Exp.*
- 35 Devor,A., Hillman,E.M., Tian,P., Waeber,C., Teng,I.C., Ruvinskaya,L.,  
36 Shalinsky,M.H., Zhu,H., Haslinger,R.H., Narayanan,S.N., Ulbert,I., Dunn,A.K.,  
37 Lo,E.H., Rosen,B.R., Dale,A.M., Kleinfeld,D., and Boas,D.A. (2008). Stimulus-  
38 induced changes in blood flow and 2-deoxyglucose uptake dissociate in ipsilateral  
39 somatosensory cortex. *J. Neurosci.* *28*, 14347-14357.

- 1 Devor,A., Tian,P., Nishimura,N., Teng,I.C., Hillman,E.M., Narayanan,S.N., Ulbert,I.,  
2 Boas,D.A., Kleinfeld,D., and Dale,A.M. (2007). Suppressed neuronal activity and  
3 concurrent arteriolar vasoconstriction may explain negative blood oxygenation level-  
4 dependent signal. *J. Neurosci.* *27*, 4452-4459.
- 5 Dhar-Chowdhury,P., Harrell,M.D., Han,S.Y., Jankowska,D., Parachuru,L.,  
6 Morrissey,A., Srivastava,S., Liu,W., Malester,B., Yoshida,H., and Coetzee,W.A.  
7 (2005). The glycolytic enzymes, glyceraldehyde-3-phosphate dehydrogenase, triose-  
8 phosphate isomerase, and pyruvate kinase are components of the K(ATP) channel  
9 macromolecular complex and regulate its function. *J. Biol. Chem.* *280*, 38464-38470.
- 10 Diaz-Garcia,C.M., Lahmann,C., Martinez-Francois,J.R., Li,B., Koveal,D.,  
11 Nathwani,N., Rahman,M., Keller,J.P., Marvin,J.S., Looger,L.L., and Yellen,G. (2019).  
12 Quantitative in vivo imaging of neuronal glucose concentrations with a genetically  
13 encoded fluorescence lifetime sensor. *J. Neurosci. Res.*
- 14 Diaz-Garcia,C.M., Mongeon,R., Lahmann,C., Koveal,D., Zucker,H., and Yellen,G.  
15 (2017). Neuronal Stimulation Triggers Neuronal Glycolysis and Not Lactate Uptake.  
16 *Cell Metab* *26*, 361-374.
- 17 Dodt,H.U., and Zieglgansberger,W. (1998). Visualization of neuronal form and  
18 function in brain slices by infrared videomicroscopy. *Histochem. J.* *30*, 141-152.
- 19 Droese,S., Brandt,U., and Hanley,P.J. (2006). K<sup>+</sup>-independent actions of diazoxide  
20 question the role of inner membrane KATP channels in mitochondrial cytoprotective  
21 signaling. *J. Biol. Chem.* *281*, 23733-23739.
- 22 Dufer,M., Krippeit-Drews,P., Buntinas,L., Siemen,D., and Drews,G. (2002). Methyl  
23 pyruvate stimulates pancreatic beta-cells by a direct effect on KATP channels, and  
24 not as a mitochondrial substrate. *Biochem. J.* *368*, 817-825.
- 25 Dunn-Meynell,A.A., Rawson,N.E., and Levin,B.E. (1998). Distribution and phenotype  
26 of neurons containing the ATP-sensitive K<sup>+</sup> channel in rat brain. *Brain Res.* *814*, 41-  
27 54.
- 28 El Hayek L., Khalifeh,M., Zibara,V., Abi,A.R., Emmanuel,N., Karnib,N., El-  
29 Ghandour,R., Nasrallah,P., Bilen,M., Ibrahim,P., Younes,J., Abou,H.E., Barmo,N.,  
30 Jabre,V., Stephan,J.S., and Sleiman,S.F. (2019). Lactate Mediates the Effects of  
31 Exercise on Learning and Memory through SIRT1-Dependent Activation of  
32 Hippocampal Brain-Derived Neurotrophic Factor (BDNF). *J. Neurosci.* *39*, 2369-  
33 2382.
- 34 Fan,Y., Kong,H., Ye,X., Ding,J., and Hu,G. (2016). ATP-sensitive potassium  
35 channels: uncovering novel targets for treating depression. *Brain Struct. Funct.* *221*,  
36 3111-3122.
- 37 Férézou,I., Cauli,B., Hill,E.L., Rossier,J., Hamel,E., and Lambolez,B. (2002). 5-HT<sub>3</sub>  
38 receptors mediate serotonergic fast synaptic excitation of neocortical vasoactive  
39 intestinal peptide/cholecystinin interneurons. *J. Neurosci.* *22*, 7389-7397.

- 1 Férézou,I., Hill,E.L., Cauli,B., Gibelin,N., Kaneko,T., Rossier,J., and Lambolez,B.  
2 (2007). Extensive overlap of mu-opioid and nicotinic sensitivity in cortical  
3 interneurons. *Cereb. Cortex* *17*, 1948-1957.
- 4 Galeffi,F., Foster,K.A., Sadgrove,M.P., Beaver,C.J., and Turner,D.A. (2007). Lactate  
5 uptake contributes to the NAD(P)H biphasic response and tissue oxygen response  
6 during synaptic stimulation in area CA1 of rat hippocampal slices. *J. Neurochem.*  
7 *103*, 2449-2461.
- 8 Gallopin,T., Geoffroy,H., Rossier,J., and Lambolez,B. (2006). Cortical sources of  
9 CRF, NKB, and CCK and their effects on pyramidal cells in the neocortex. *Cereb.*  
10 *Cortex* *16*, 1440-1452.
- 11 Galow,L.V., Schneider,J., Lewen,A., Ta,T.T., Papageorgiou,I.E., and Kann,O. (2014).  
12 Energy substrates that fuel fast neuronal network oscillations. *Front Neurosci.* *8*, 398.
- 13 German,M.S. (1993). Glucose sensing in pancreatic islet beta cells: the key role of  
14 glucokinase and the glycolytic intermediates. *Proc. Natl. Acad. Sci. U. S. A* *90*, 1781-  
15 1785.
- 16 Gimenez-Cassina,A., Martinez-Francois,J.R., Fisher,J.K., Szlyk,B., Polak,K.,  
17 Wiwczar,J., Tanner,G.R., Lutas,A., Yellen,G., and Danial,N.N. (2012). BAD-  
18 Dependent Regulation of Fuel Metabolism and K(ATP) Channel Activity Confers  
19 Resistance to Epileptic Seizures. *Neuron* *74*, 719-730.
- 20 Girouard,H., Bonev,A.D., Hannah,R.M., Meredith,A., Aldrich,R.W., and Nelson,M.T.  
21 (2010). Astrocytic endfoot Ca<sup>2+</sup> and BK channels determine both arteriolar dilation  
22 and constriction. *Proc. Natl. Acad. Sci. U. S. A* *107*, 3811-3816.
- 23 Gribble,F.M., Ashfield,R., Ammala,C., and Ashcroft,F.M. (1997). Properties of cloned  
24 ATP-sensitive K<sup>+</sup> currents expressed in *Xenopus* oocytes. *J. Physiol* *498* ( Pt 1), 87-  
25 98.
- 26 Gulyas,A.I., Buzsaki,G., Freund,T.F., and Hirase,H. (2006). Populations of  
27 hippocampal inhibitory neurons express different levels of cytochrome c. *Eur. J.*  
28 *Neurosci.* *23*, 2581-2594.
- 29 Gupta,A., Wang,Y., and Markram,H. (2000). Organizing principles for a diversity of  
30 GABAergic interneurons and synapses in the neocortex. *Science* *287*, 273-278.
- 31 Haj-Dahmane,S., and Andrade,R. (1997). Calcium-activated cation nonselective  
32 current contributes to the fast afterdepolarization in rat prefrontal cortex neurons. *J.*  
33 *Neurophysiol.* *78*, 1983-1989.
- 34 Halabisky,B.E., Shen,F., Huguenard,J.R., and Prince,D.A. (2006).  
35 Electrophysiological Classification of Somatostatin-positive Interneurons in Mouse  
36 Sensorimotor Cortex. *J. Neurophysiol.*
- 37 Hall,C.N., Klein-Flugge,M.C., Howarth,C., and Attwell,D. (2012). Oxidative  
38 phosphorylation, not glycolysis, powers presynaptic and postsynaptic mechanisms  
39 underlying brain information processing. *J. Neurosci.* *32*, 8940-8951.

- 1 Heron-Milhavet,L., Xue-Jun,Y., Vannucci,S.J., Wood,T.L., Willing,L.B., Stannard,B.,  
2 Hernandez-Sanchez,C., Mobbs,C., Virsolvy,A., and LeRoith,D. (2004). Protection  
3 against hypoxic-ischemic injury in transgenic mice overexpressing Kir6.2 channel  
4 pore in forebrain. *Mol. Cell Neurosci.* *25*, 585-593.
- 5 Hill,E.L., Gallopin,T., F  r  zou,I., Cauli,B., Rossier,J., Schweitzer,P., and Lambolez,B.  
6 (2007). Functional CB1 receptors are broadly expressed in neocortical GABAergic  
7 and glutamatergic neurons. *J. Neurophysiol.* *97*, 2580-2589.
- 8 Houades,V., Koulakoff,A., Ezan,P., Seif,I., and Giaume,C. (2008). Gap junction-  
9 mediated astrocytic networks in the mouse barrel cortex. *J. Neurosci.* *28*, 5207-5217.
- 10 Hu,Y., and Wilson,G.S. (1997a). A temporary local energy pool coupled to neuronal  
11 activity: fluctuations of extracellular lactate levels in rat brain monitored with rapid-  
12 response enzyme-based sensor. *J. Neurochem.* *69*, 1484-1490.
- 13 Hu,Y., and Wilson,G.S. (1997b). Rapid changes in local extracellular rat brain  
14 glucose observed with an in vivo glucose sensor. *J. Neurochem.* *68*, 1745-1752.
- 15 Imamura,H., Nhat,K.P., Togawa,H., Saito,K., Iino,R., Kato-Yamada,Y., Nagai,T., and  
16 Noji,H. (2009). Visualization of ATP levels inside single living cells with fluorescence  
17 resonance energy transfer-based genetically encoded indicators. *Proc. Natl. Acad.*  
18 *Sci. U. S. A* *106*, 15651-15656.
- 19 Inagaki,N., Gono,T., Clement,J.P., Namba,N., Inazawa,J., Gonzalez,G., Aguilar-  
20 Bryan,L., Seino,S., and Bryan,J. (1995a). Reconstitution of IKATP: an inward rectifier  
21 subunit plus the sulfonylurea receptor. *Science* *270*, 1166-1170.
- 22 Inagaki,N., Gono,T., Clement,J.P., Wang,C.Z., Aguilar-Bryan,L., Bryan,J., and  
23 Seino,S. (1996). A family of sulfonylurea receptors determines the pharmacological  
24 properties of ATP-sensitive K<sup>+</sup> channels. *Neuron* *16*, 1011-1017.
- 25 Inagaki,N., Tsuura,Y., Namba,N., Masuda,K., Gono,T., Horie,M., Seino,Y.,  
26 Mizuta,M., and Seino,S. (1995b). Cloning and functional characterization of a novel  
27 ATP-sensitive potassium channel ubiquitously expressed in rat tissues, including  
28 pancreatic islets, pituitary, skeletal muscle, and heart. *J. Biol. Chem.* *270*, 5691-5694.
- 29 Isomoto,S., Kondo,C., Yamada,M., Matsumoto,S., Higashiguchi,O., Horio,Y.,  
30 Matsuzawa,Y., and Kurachi,Y. (1996). A novel sulfonylurea receptor forms with BIR  
31 (Kir6.2) a smooth muscle type ATP-sensitive K<sup>+</sup> channel. *J. Biol. Chem.* *271*, 24321-  
32 24324.
- 33 Isomoto,S., and Kurachi,Y. (1997). Function, regulation, pharmacology, and  
34 molecular structure of ATP-sensitive K<sup>+</sup> channels in the cardiovascular system. *J.*  
35 *Cardiovasc. Electrophysiol.* *8*, 1431-1446.
- 36 Ivanov,A.I., Malkov,A.E., Waseem,T., Mukhtarov,M., Buldakova,S., Gubkina,O.,  
37 Zilberter,M., and Zilberter,Y. (2014). Glycolysis and oxidative phosphorylation in  
38 neurons and astrocytes during network activity in hippocampal slices. *J. Cereb.*  
39 *Blood Flow Metab* *34*, 397-407.



- 1 Jimenez-Blasco,D., Busquets-Garcia,A., Hebert-Chatelain,E., Serrat,R., Vicente-  
2 Gutierrez,C., Ioannidou,C., Gomez-Sotres,P., Lopez-Fabuel,I., Resch-Beusher,M.,  
3 Resel,E., Arnouil,D., Saraswat,D., Varilh,M., Cannich,A., Julio-Kalajzic,F., Bonilla-  
4 Del,R., I, Almeida,A., Puente,N., Achicallende,S., Lopez-Rodriguez,M.L., Jolle,C.,  
5 Deglon,N., Pellerin,L., Josephine,C., Bonvento,G., Panatier,A., Lutz,B., Piazza,P.V.,  
6 Guzman,M., Bellocchio,L., Bouzier-Sore,A.K., Grandes,P., Bolanos,J.P., and  
7 Marsicano,G. (2020). Glucose metabolism links astroglial mitochondria to  
8 cannabinoid effects. *Nature*.
- 9 Kann,O., Papageorgiou,I.E., and Draguhn,A. (2014). Highly energized inhibitory  
10 interneurons are a central element for information processing in cortical networks. *J.*  
11 *Cereb. Blood Flow Metab* *34*, 1270-1282.
- 12 Karagiannis,A., Gallopin,T., David,C., Battaglia,D., Geoffroy,H., Rossier,J.,  
13 Hillman,E.M., Staiger,J.F., and Cauli,B. (2009). Classification of NPY-expressing  
14 neocortical interneurons. *J. Neurosci.* *29*, 3642-3659.
- 15 Karagiannis,A., Sylantsev,S., Hadjihambi,A., Hosford,P.S., Kasparov,S., and  
16 Gourine,A.V. (2015). Hemichannel-mediated release of lactate. *J. Cereb. Blood Flow*  
17 *Metab*.
- 18 Karschin,C., Ecke,C., Ashcroft,F.M., and Karschin,A. (1997). Overlapping distribution  
19 of K(ATP) channel-forming Kir6.2 subunit and the sulfonylurea receptor SUR1 in  
20 rodent brain. *FEBS Lett.* *401*, 59-64.
- 21 Kawaguchi,Y. (1993). Groupings of nonpyramidal and pyramidal cells with specific  
22 physiological and morphological characteristics in rat frontal cortex. *J. Neurophysiol.*  
23 *69*, 416-431.
- 24 Kawaguchi,Y. (1995). Physiological subgroups of nonpyramidal cells with specific  
25 morphological characteristics in layer II/III of rat frontal cortex. *J. Neurosci.* *15*, 2638-  
26 2655.
- 27 Kawamura,M., Jr., Ruskin,D.N., and Masino,S.A. (2010). Metabolic Autocrine  
28 Regulation of Neurons Involves Cooperation among Pannexin Hemichannels,  
29 Adenosine Receptors, and KATP Channels. *J. Neurosci.* *30*, 3886-3895.
- 30 Krawchuk,M.B., Ruff,C.F., Yang,X., Ross,S.E., and Vazquez,A.L. (2019).  
31 Optogenetic assessment of VIP, PV, SOM and NOS inhibitory neuron activity and  
32 cerebral blood flow regulation in mouse somato-sensory cortex  
33 1. *J. Cereb. Blood Flow Metab* 271678X19870105.
- 34 Lacroix,A., Toussay,X., Anenberg,E., Lecrux,C., Ferreiros,N., Karagiannis,A.,  
35 Plaisier,F., Chausson,P., Jarlier,F., Burgess,S.A., Hillman,E.M., Tegeder,I.,  
36 Murphy,T.H., Hamel,E., and Cauli,B. (2015). COX-2-Derived Prostaglandin E2  
37 Produced by Pyramidal Neurons Contributes to Neurovascular Coupling in the  
38 Rodent Cerebral Cortex. *J. Neurosci.* *35*, 11791-11810.
- 39 Lambolez,B., Audinat,E., Bochet,P., Crepel,F., and Rossier,J. (1992). AMPA receptor  
40 subunits expressed by single Purkinje cells. *Neuron* *9*, 247-258.



- 1 Laughton, J.D., Charnay, Y., Belloir, B., Pellerin, L., Magistretti, P.J., and Bouras, C.  
2 (2000). Differential messenger RNA distribution of lactate dehydrogenase LDH-1 and  
3 LDH-5 isoforms in the rat brain. *Neuroscience* 96, 619-625.
- 4 Lauritzen, K.H., Morland, C., Puchades, M., Holm-Hansen, S., Hagelin, E.M.,  
5 Lauritzen, F., Attramadal, H., Storm-Mathisen, J., Gjedde, A., and Bergersen, L.H.  
6 (2014). Lactate receptor sites link neurotransmission, neurovascular coupling, and  
7 brain energy metabolism. *Cereb. Cortex* 24, 2784-2795.
- 8 Le Douce J., Maugard, M., Veran, J., Matos, M., Jago, P., Vigneron, P.A., Faivre, E.,  
9 Toussay, X., Vandenberghe, M., Balbastre, Y., Piquet, J., Guiot, E., Tran, N.T.,  
10 Taverna, M., Marinesco, S., Koyanagi, A., Furuya, S., Gaudin-Guerif, M., Goutal, S.,  
11 Ghetta, A., Pruvost, A., Bemelmans, A.P., Gaillard, M.C., Cambon, K., Stimmer, L.,  
12 Sazdovitch, V., Duyckaerts, C., Knott, G., Herard, A.S., Delzescaux, T., Hantraye, P.,  
13 Brouillet, E., Cauli, B., Olié, S.H.R., Panatier, A., and Bonvento, G. (2020). Impairment  
14 of Glycolysis-Derived L-Serine Production in Astrocytes Contributes to Cognitive  
15 Deficits in Alzheimer's Disease. *Cell Metab* 31, 503-517.
- 16 Lee, K.P.K., Chen, J., and MacKinnon, R. (2017). Molecular structure of human KATP  
17 in complex with ATP and ADP. *Elife*. 6.
- 18 Lee, Y., Morrison, B.M., Li, Y., Lengacher, S., Farah, M.H., Hoffman, P.N., Liu, Y.,  
19 Tsingalia, A., Jin, L., Zhang, P.W., Pellerin, L., Magistretti, P.J., and Rothstein, J.D.  
20 (2012). Oligodendroglia metabolically support axons and contribute to  
21 neurodegeneration. *Nature*.
- 22 Lemak, M.S., Voloshanenko, O., Draguhn, A., and Egorov, A.V. (2014). KATP channels  
23 modulate intrinsic firing activity of immature entorhinal cortex layer III neurons. *Front*  
24 *Cell Neurosci.* 8, 255.
- 25 Lennie, P. (2003). The cost of cortical computation. *Curr. Biol.* 13, 493-497.
- 26 Lerchundi, R., Fernandez-Moncada, I., Contreras-Baeza, Y., Sotelo-Hitschfeld, T.,  
27 Machler, P., Wyss, M.T., Stobart, J., Baeza-Lehnert, F., Alegria, K., Weber, B., and  
28 Barros, L.F. (2015). NH<sub>4</sub><sup>+</sup> triggers the release of astrocytic lactate via mitochondrial  
29 pyruvate shunting. *Proc. Natl. Acad. Sci. U. S. A.*
- 30 Li, N., Wu, J.X., Ding, D., Cheng, J., Gao, N., and Chen, L. (2017). Structure of a  
31 Pancreatic ATP-Sensitive Potassium Channel. *Cell* 168, 101-110.
- 32 Liss, B., Bruns, R., and Roeper, J. (1999). Alternative sulfonylurea receptor expression  
33 defines metabolic sensitivity of K-ATP channels in dopaminergic midbrain neurons.  
34 *EMBO J.* 18, 833-846.
- 35 Logothetis, N.K. (2008). What we can do and what we cannot do with fMRI. *Nature*  
36 453, 869-878.
- 37 Lundgaard, I., Li, B., Xie, L., Kang, H., Sanggaard, S., Haswell, J.D., Sun, W.,  
38 Goldman, S., Blekot, S., Nielsen, M., Takano, T., Deane, R., and Nedergaard, M. (2015).  
39 Direct neuronal glucose uptake heralds activity-dependent increases in cerebral  
40 metabolism. *Nat. Commun.* 6, 6807.

- 1 Machler,P., Wyss,M.T., Elsayed,M., Stobart,J., Gutierrez,R., von Faber-Castell,A.,  
2 Kaelin,V., Zuend,M., San,M.A., Romero-Gomez,I., Baeza-Lehnert,F., Lengacher,S.,  
3 Schneider,B.L., Aebischer,P., Magistretti,P.J., Barros,L.F., and Weber,B. (2016). In  
4 Vivo Evidence for a Lactate Gradient from Astrocytes to Neurons. *Cell Metab* 23, 94-  
5 102.
- 6 Magistretti,P.J., and Allaman,I. (2018). Lactate in the brain: from metabolic end-  
7 product to signalling molecule. *Nat. Rev. Neurosci.* 19, 235-249.
- 8 Martin,G.M., Yoshioka,C., Rex,E.A., Fay,J.F., Xie,Q., Whorton,M.R., Chen,J.Z., and  
9 Shyng,S.L. (2017). Cryo-EM structure of the ATP-sensitive potassium channel  
10 illuminates mechanisms of assembly and gating. *Elife.* 6.
- 11 Miki,T., Liss,B., Minami,K., Shiuchi,T., Saraya,A., Kashima,Y., Horiuchi,M.,  
12 Ashcroft,F., Minokoshi,Y., Roeper,J., and Seino,S. (2001). ATP-sensitive K<sup>+</sup>  
13 channels in the hypothalamus are essential for the maintenance of glucose  
14 homeostasis. *Nat. Neurosci.* 4, 507-512.
- 15 Miki,T., Nagashima,K., Tashiro,F., Kotake,K., Yoshitomi,H., Tamamoto,A., Gono,T.,  
16 Iwanaga,T., Miyazaki,J., and Seino,S. (1998). Defective insulin secretion and  
17 enhanced insulin action in KATP channel-deficient mice. *Proc. Natl. Acad. Sci. U. S.*  
18 *A* 95, 10402-10406.
- 19 Molnar,G., Farago,N., Kocsis,A.K., Rozsa,M., Lovas,S., Boldog,E., Baldi,R.,  
20 Csajbok,E., Gardi,J., Puskas,L.G., and Tamas,G. (2014). GABAergic neurogliaform  
21 cells represent local sources of insulin in the cerebral cortex. *J. Neurosci.* 34, 1133-  
22 1137.
- 23 Moreau,C., Prost,A.L., Derand,R., and Vivaudou,M. (2005). SUR, ABC proteins  
24 targeted by KATP channel openers. *J. Mol. Cell Cardiol.* 38, 951-963.
- 25 Newgard,C.B., and McGarry,J.D. (1995). Metabolic coupling factors in pancreatic  
26 beta-cell signal transduction. *Annu. Rev. Biochem.* 64, 689-719.
- 27 Ogawa,M., Watabe,H., Teramoto,N., Miyake,Y., Hayashi,T., Iida,H., Murata,T., and  
28 Magata,Y. (2005). Understanding of cerebral energy metabolism by dynamic living  
29 brain slice imaging system with [18F]FDG. *Neurosci. Res.* 52, 357-361.
- 30 Okuyama,Y., Yamada,M., Kondo,C., Satoh,E., Isomoto,S., Shindo,T., Horio,Y.,  
31 Kitakaze,M., Hori,M., and Kurachi,Y. (1998). The effects of nucleotides and  
32 potassium channel openers on the SUR2A/Kir6.2 complex K<sup>+</sup> channel expressed in  
33 a mammalian cell line, HEK293T cells. *Pflugers Arch.* 435, 595-603.
- 34 Pellerin,L., and Magistretti,P.J. (1994). Glutamate uptake into astrocytes stimulates  
35 aerobic glycolysis: a mechanism coupling neuronal activity to glucose utilization.  
36 *Proc. Natl. Acad. Sci. U. S. A.* 91, 10625-9.
- 37 Perrenoud,Q., Geoffroy,H., Gauthier,B., Rancillac,A., Alfonsi,F., Kessarar,N.,  
38 Rossier,J., Vitalis,T., and Gallopin,T. (2012). Characterization of Type I and Type II  
39 nNOS-Expressing Interneurons in the Barrel Cortex of Mouse. *Front Neural Circuits.*  
40 6, 36.

- 1 Piquet,J., Toussay,X., Hepp,R., Lerchundi,R., Le,D.J., Faivre,E., Guiot,E.,  
2 Bonvento,G., and Cauli,B. (2018). Supragranular Pyramidal Cells Exhibit Early  
3 Metabolic Alterations in the 3xTg-AD Mouse Model of Alzheimer's Disease. *Front*  
4 *Cell Neurosci.* *12*, 216.
- 5 Prichard,J., Rothman,D., Novotny,E., Petroff,O., Kuwabara,T., Avison,M.,  
6 Howseman,A., Hanstock,C., and Shulman,R. (1991). Lactate rise detected by <sup>1</sup>H  
7 NMR in human visual cortex during physiologic stimulation. *Proc. Natl. Acad. Sci. U.*  
8 *S. A* *88*, 5829-5831.
- 9 Puljung,M.C. (2018). Cryo-electron microscopy structures and progress toward a  
10 dynamic understanding of KATP channels. *J. Gen. Physiol* *150*, 653-669.
- 11 Pullen,T.J., da,S., X, Kelsey,G., and Rutter,G.A. (2011). miR-29a and miR-29b  
12 contribute to pancreatic beta-cell-specific silencing of monocarboxylate transporter 1  
13 (Mct1). *Mol. Cell Biol.* *31*, 3182-3194.
- 14 Quistorff,B., Secher,N.H., and Van Lieshout,J.J. (2008). Lactate fuels the human  
15 brain during exercise. *FASEB J.* *22*, 3443-3449.
- 16 Raichle,M.E., and Mintun,M.A. (2006). Brain work and brain imaging. *Annu. Rev.*  
17 *Neurosci.* *29*, 449-476.
- 18 Rouach,N., Koulakoff,A., Abudara,V., Willecke,K., and Giaume,C. (2008). Astroglial  
19 metabolic networks sustain hippocampal synaptic transmission. *Science* *322*, 1551-  
20 1555.
- 21 Ruminot,I., Gutierrez,R., Pena-Munzenmayer,G., Anazco,C., Sotelo-Hitschfeld,T.,  
22 Lerchundi,R., Niemeyer,M.I., Shull,G.E., and Barros,L.F. (2011). NBCe1 Mediates  
23 the Acute Stimulation of Astrocytic Glycolysis by Extracellular K<sup>+</sup>. *J. Neurosci.* *31*,  
24 14264-14271.
- 25 Sada,N., Lee,S., Katsu,T., Otsuki,T., and Inoue,T. (2015). Epilepsy treatment.  
26 Targeting LDH enzymes with a stiripentol analog to treat epilepsy. *Science* *347*,  
27 1362-1367.
- 28 Sakura,H., Ammala,C., Smith,P.A., Gribble,F.M., and Ashcroft,F.M. (1995). Cloning  
29 and functional expression of the cDNA encoding a novel ATP-sensitive potassium  
30 channel subunit expressed in pancreatic beta-cells, brain, heart and skeletal muscle.  
31 *FEBS Lett.* *377*, 338-344.
- 32 Saunders,A., Macosko,E.Z., Wysoker,A., Goldman,M., Krienen,F.M., de,R.H.,  
33 Bien,E., Baum,M., Bortolin,L., Wang,S., Goeva,A., Nemesh,J., Kamitaki,N.,  
34 Brumbaugh,S., Kulp,D., and McCarroll,S.A. (2018). Molecular Diversity and  
35 Specializations among the Cells of the Adult Mouse Brain. *Cell* *174*, 1015-1030.
- 36 Schindelin,J., Rganda-Carreras,I., Frise,E., Kaynig,V., Longair,M., Pietzsch,T.,  
37 Preibisch,S., Rueden,C., Saalfeld,S., Schmid,B., Tinevez,J.Y., White,D.J.,  
38 Hartenstein,V., Eliceiri,K., Tomancak,P., and Cardona,A. (2012). Fiji: an open-source  
39 platform for biological-image analysis. *Nat. Methods* *9*, 676-682.

- 1 Schurr,A., Miller,J.J., Payne,R.S., and Rigor,B.M. (1999). An increase in lactate  
2 output by brain tissue serves to meet the energy needs of glutamate-activated  
3 neurons. *J. Neurosci.* *19*, 34-39.
- 4 Schurr,A., West,C.A., and Rigor,B.M. (1988). Lactate-supported synaptic function in  
5 the rat hippocampal slice preparation. *Science* *240*, 1326-1328.
- 6 Sekine,N., Cirulli,V., Regazzi,R., Brown,L.J., Gine,E., Tamarit-Rodriguez,J.,  
7 Girotti,M., Marie,S., MacDonald,M.J., Wollheim,C.B., and . (1994). Low lactate  
8 dehydrogenase and high mitochondrial glycerol phosphate dehydrogenase in  
9 pancreatic beta-cells. Potential role in nutrient sensing. *J. Biol. Chem.* *269*, 4895-  
10 4902.
- 11 Shmuel,A., Augath,M., Oeltermann,A., and Logothetis,N.K. (2006). Negative  
12 functional MRI response correlates with decreases in neuronal activity in monkey  
13 visual area V1. *Nat. Neurosci.* *9*, 569-577.
- 14 Shmuel,A., Yacoub,E., Pfeuffer,J., Van de Moortele,P.F., Adriany,G., Hu,X., and  
15 Ugurbil,K. (2002). Sustained negative BOLD, blood flow and oxygen consumption  
16 response and its coupling to the positive response in the human brain. *Neuron* *36*,  
17 1195-1210.
- 18 Silver,I.A., and Erecinska,M. (1994). Extracellular glucose concentration in  
19 mammalian brain: continuous monitoring of changes during increased neuronal  
20 activity and upon limitation in oxygen supply in normo-, hypo-, and hyperglycemic  
21 animals. *J. Neurosci.* *14*, 5068-5076.
- 22 Song,Z., and Routh,V.H. (2005). Differential effects of glucose and lactate on  
23 glucosensing neurons in the ventromedial hypothalamic nucleus. *Diabetes* *54*, 15-22.
- 24 Sotelo-Hitschfeld,T., Niemeyer,M.I., Machler,P., Ruminot,I., Lerchundi,R., Wyss,M.T.,  
25 Stobart,J., Fernandez-Moncada,I., Valdebenito,R., Garrido-Gerter,P., Contreras-  
26 Baeza,Y., Schneider,B.L., Aebischer,P., Lengacher,S., San,M.A., Le,D.J.,  
27 Bonvento,G., Magistretti,P.J., Sepulveda,F.V., Weber,B., and Barros,L.F. (2015).  
28 Channel-mediated lactate release by k<sup>+</sup>-stimulated astrocytes. *J. Neurosci.* *35*, 4168-  
29 4178.
- 30 Stella,N., Schweitzer,P., and Piomelli,D. (1997). A second endogenous cannabinoid  
31 that modulates long-term potentiation. *Nature* *388*, 773-778.
- 32 Sun,H.S., Feng,Z.P., Miki,T., Seino,S., and French,R.J. (2006). Enhanced neuronal  
33 damage after ischemic insults in mice lacking Kir6.2-containing ATP-sensitive K<sup>+</sup>  
34 channels. *J. Neurophysiol.* *95*, 2590-2601.
- 35 Suzuki,A., Stern,S.A., Bozdagi,O., Huntley,G.W., Walker,R.H., Magistretti,P.J., and  
36 Alberini,C.M. (2011). Astrocyte-neuron lactate transport is required for long-term  
37 memory formation. *Cell* *144*, 810-823.
- 38 Tanner,G.R., Lutas,A., Martinez-Francois,J.R., and Yellen,G. (2011). Single K ATP  
39 channel opening in response to action potential firing in mouse dentate granule  
40 neurons. *J. Neurosci.* *31*, 8689-8696.

- 1 Tantama,M., Martinez-Francois,J.R., Mongeon,R., and Yellen,G. (2013). Imaging  
2 energy status in live cells with a fluorescent biosensor of the intracellular ATP-to-ADP  
3 ratio. *Nat. Commun.* 4, 2550.
- 4 Tarasov,A.I., Girard,C.A., and Ashcroft,F.M. (2006). ATP sensitivity of the ATP-  
5 sensitive K<sup>+</sup> channel in intact and permeabilized pancreatic beta-cells. *Diabetes* 55,  
6 2446-2454.
- 7 Tasic,B., Menon,V., Nguyen,T.N., Kim,T.K., Jarsky,T., Yao,Z., Levi,B., Gray,L.T.,  
8 Sorensen,S.A., Dolbeare,T., Bertagnolli,D., Goldy,J., Shapovalova,N., Parry,S.,  
9 Lee,C., Smith,K., Bernard,A., Madisen,L., Sunkin,S.M., Hawrylycz,M., Koch,C., and  
10 Zeng,H. (2016). Adult mouse cortical cell taxonomy revealed by single cell  
11 transcriptomics. *Nat. Neurosci.*
- 12 Thevenaz,P., Ruttimann,U.E., and Unser,M. (1998). A pyramid approach to subpixel  
13 registration based on intensity. *IEEE Trans. Image Process* 7, 27-41.
- 14 Thoby-Brisson,M., Cauli,B., Champagnat,J., Fortin,G., and Katz,D.M. (2003).  
15 Expression of functional tyrosine kinase B receptors by rhythmically active respiratory  
16 neurons in the pre-Botzinger complex of neonatal mice. *J. Neurosci.* 23, 7685-7689.
- 17 Thomzig,A., Laube,G., Pruss,H., and Veh,R.W. (2005). Pore-forming subunits of K-  
18 ATP channels, Kir6.1 and Kir6.2, display prominent differences in regional and  
19 cellular distribution in the rat brain. *J. Comp Neurol.* 484, 313-330.
- 20 Tsuzuki,K., Lambolez,B., Rossier,J., and Ozawa,S. (2001). Absolute quantification of  
21 AMPA receptor subunit mRNAs in single hippocampal neurons. *J. Neurochem.* 77,  
22 1650-1659.
- 23 Uhlirova,H., Kilic,K., Tian,P., Thunemann,M., Desjardins,M., Saisan,P.A.,  
24 Sakadzic,S., Ness,T.V., Mateo,C., Cheng,Q., Weldy,K.L., Razoux,F.,  
25 Vanderberghe,M., Cremonesi,J.A., Ferri,C.G., Nizar,K., Sridhar,V.B., Steed,T.C.,  
26 Abashin,M., Fainman,Y., Masliah,E., Djurovic,S., Andreassen,O., Silva,G.A.,  
27 Boas,D.A., Kleinfeld,D., Buxton,R.B., Einevoll,G.T., Dale,A.M., and Devor,A. (2016).  
28 Cell type specificity of neurovascular coupling in cerebral cortex. *Elife.* 5.
- 29 Vanlandewijck,M., He,L., Mae,M.A., Andrae,J., Ando,K., Del,G.F., Nahar,K.,  
30 Lebouvier,T., Lavina,B., Gouveia,L., Sun,Y., Raschperger,E., Rasanen,M., Zarb,Y.,  
31 Mochizuki,N., Keller,A., Lendahl,U., and Betsholtz,C. (2018). A molecular atlas of cell  
32 types and zonation in the brain vasculature. *Nature* 554, 475-480.
- 33 Varin,C., Rancillac,A., Geoffroy,H., Arthaud,S., Fort,P., and Gallopin,T. (2015).  
34 Glucose Induces Slow-Wave Sleep by Exciting the Sleep-Promoting Neurons in the  
35 Ventrolateral Preoptic Nucleus: A New Link between Sleep and Metabolism. *J.*  
36 *Neurosci.* 35, 9900-9911.
- 37 Vezzoli,E., Cali,C., De,R.M., Ponzoni,L., Sogne,E., Gagnon,N., Francolini,M.,  
38 Braidà,D., Sala,M., Müller,D., Falqui,A., and Magistretti,P.J. (2020). Ultrastructural  
39 Evidence for a Role of Astrocytes and Glycogen-Derived Lactate in Learning-  
40 Dependent Synaptic Stabilization. *Cereb. Cortex* 30, 2114-2127.



- 1 Voutsinos-Porche,B., Bonvento,G., Tanaka,K., Steiner,P., Welker,E., Chatton,J.Y.,  
2 Magistretti,P.J., and Pellerin,L. (2003). Glial glutamate transporters mediate a  
3 functional metabolic crosstalk between neurons and astrocytes in the mouse  
4 developing cortex. *Neuron* 37, 275-286.
- 5 Ward,J.H. (1963). Hierarchical grouping to optimize an objective function. *Journal of*  
6 *the American Statistical Association* 58, 236-244.
- 7 Wilson,J.E. (2003). Isozymes of mammalian hexokinase: structure, subcellular  
8 localization and metabolic function. *J. Exp. Biol.* 206, 2049-2057.
- 9 Wyss,M.T., Jolivet,R., Buck,A., Magistretti,P.J., and Weber,B. (2011). In vivo  
10 evidence for lactate as a neuronal energy source. *J. Neurosci.* 31, 7477-7485.
- 11 Xi,Q., Cheranov,S.Y., and Jaggar,J.H. (2005). Mitochondria-derived reactive oxygen  
12 species dilate cerebral arteries by activating Ca<sup>2+</sup> sparks. *Circ. Res.* 97, 354-362.
- 13 Yamada,M., Isomoto,S., Matsumoto,S., Kondo,C., Shindo,T., Horio,Y., and  
14 Kurachi,Y. (1997). Sulphonylurea receptor 2B and Kir6.1 form a sulphonylurea-  
15 sensitive but ATP-insensitive K<sup>+</sup> channel. *J. Physiol* 499 ( Pt 3), 715-720.
- 16 Yang,X.J., Kow,L.M., Funabashi,T., and Mobbs,C.V. (1999). Hypothalamic glucose  
17 sensor: similarities to and differences from pancreatic beta-cell mechanisms.  
18 *Diabetes* 48, 1763-1772.
- 19 Zawar,C., and Neumcke,B. (2000). Differential activation of ATP-sensitive potassium  
20 channels during energy depletion in CA1 pyramidal cells and interneurons of rat  
21 hippocampus. *Pflugers Arch.* 439, 256-262.
- 22 Zawar,C., Plant,T.D., Schirra,C., Konnerth,A., and Neumcke,B. (1999). Cell-type  
23 specific expression of ATP-sensitive potassium channels in the rat hippocampus. *J.*  
24 *Physiol* 514 ( Pt 2), 327-341.
- 25 Zeisel,A., Machado,A.B., Codeluppi,S., Lonnerberg,P., La,M.G., Jureus,A.,  
26 Marques,S., Munguba,H., He,L., Betsholtz,C., Rolny,C., Castelo-Branco,G., Hjerling-  
27 Leffler,J., and Linnarsson,S. (2015). Cell types in the mouse cortex and hippocampus  
28 revealed by single-cell RNA-seq. *Science*.  
29  
30
